# Supplementary material for: Temperature-induced changes in the wheat phosphoproteome reveal temperature-regulated interconversion of phosphoforms
Source: PubMed Central journal article supplement (PMC6117581; doi:10.1093/jxb/ery204), 2018-06-25
Supplement: ery204_suppl_supplementary_figures.pdf [file ery204_suppl_supplementary_figures.pdf]

## SUPPLEMENTARY INFORMATION

**Temperature-induced changes in wheat phosphoproteome reveal temperature-regulated interconversion of phosphoforms**

Lam Dai Vu<sup>1,2,3,4,\*</sup>, Tingting Zhu<sup>1,2,3,4,\*</sup>, Inge Verstraeten<sup>1,2,\$</sup>, Brigitte van de Cotte<sup>1,2</sup>, IWGSC<sup>5</sup>, Kris Gevaert<sup>3,4,#</sup>, Ive De Smet<sup>1,2,#,\$</sup>

## SUPPLEMENTARY FIGURES

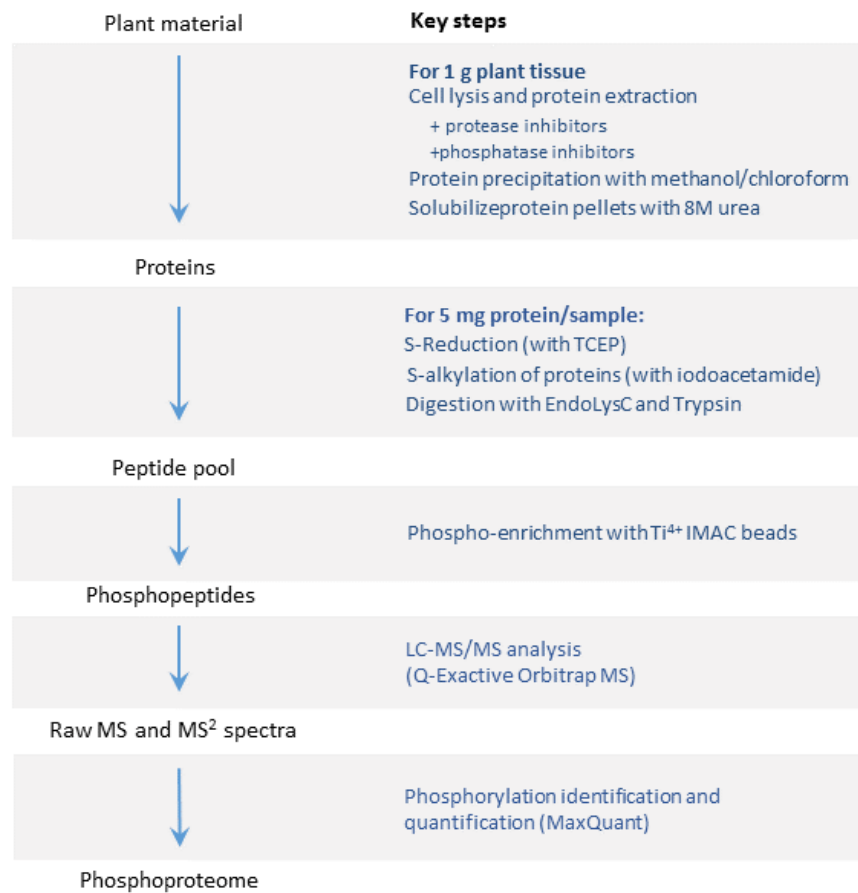

**Figure S1.** Summary of the phosphoproteomic workflow. The figure is adapted from Vu *et al.* (2016) *J Proteome Res* 15:4304-4317.

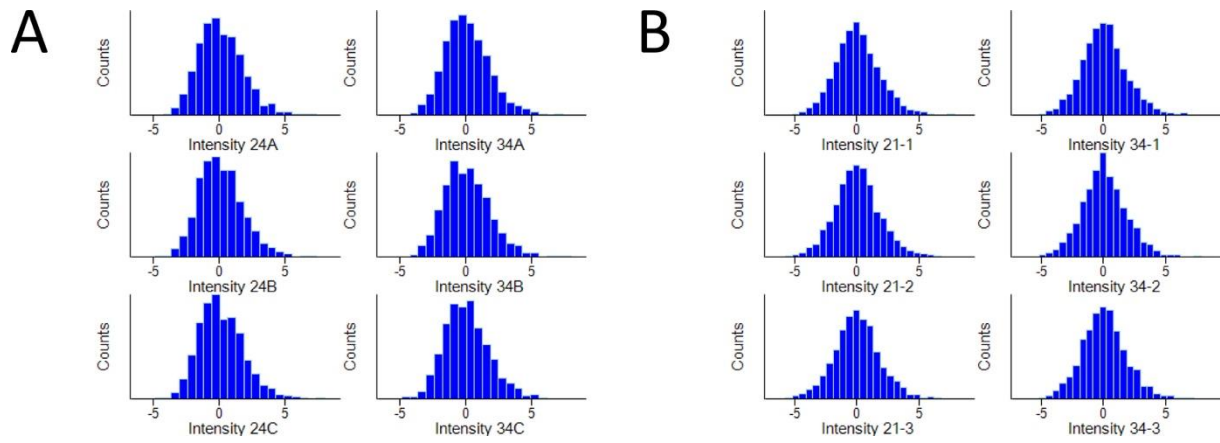

**Figure S2.** Histograms show normal distribution of Log<sub>2</sub> Intensity of quantifiable proteins (proteins present in only one of two temperatures or having at least 2 valid values per temperature) in leaf (A) and spikelet (B).

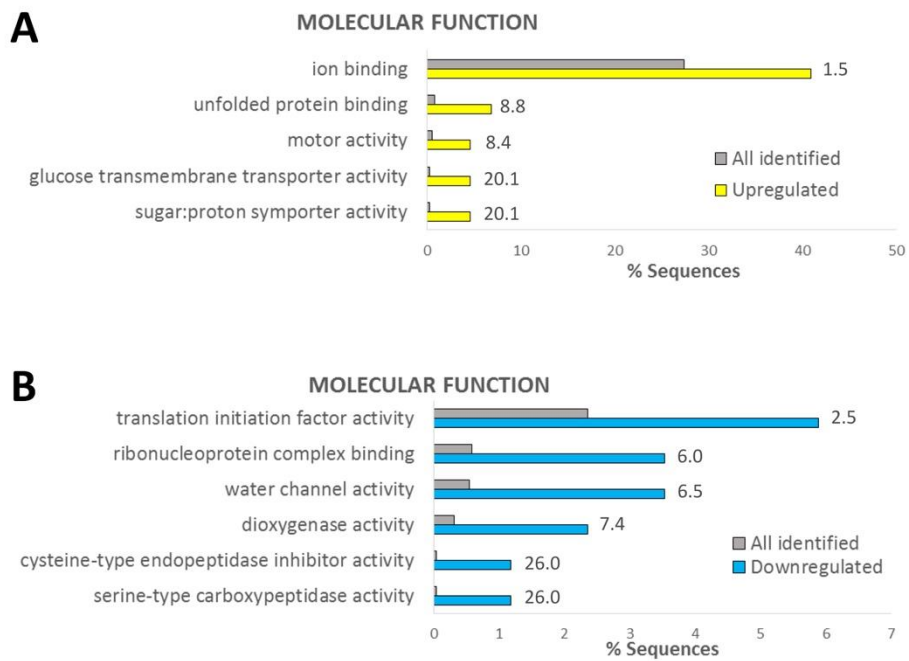

**Figure S3.** Overrepresented GO terms for molecular functions among leaf proteins with (A) upregulated or (B) downregulated phosphosites. Fold-changes are indicated.

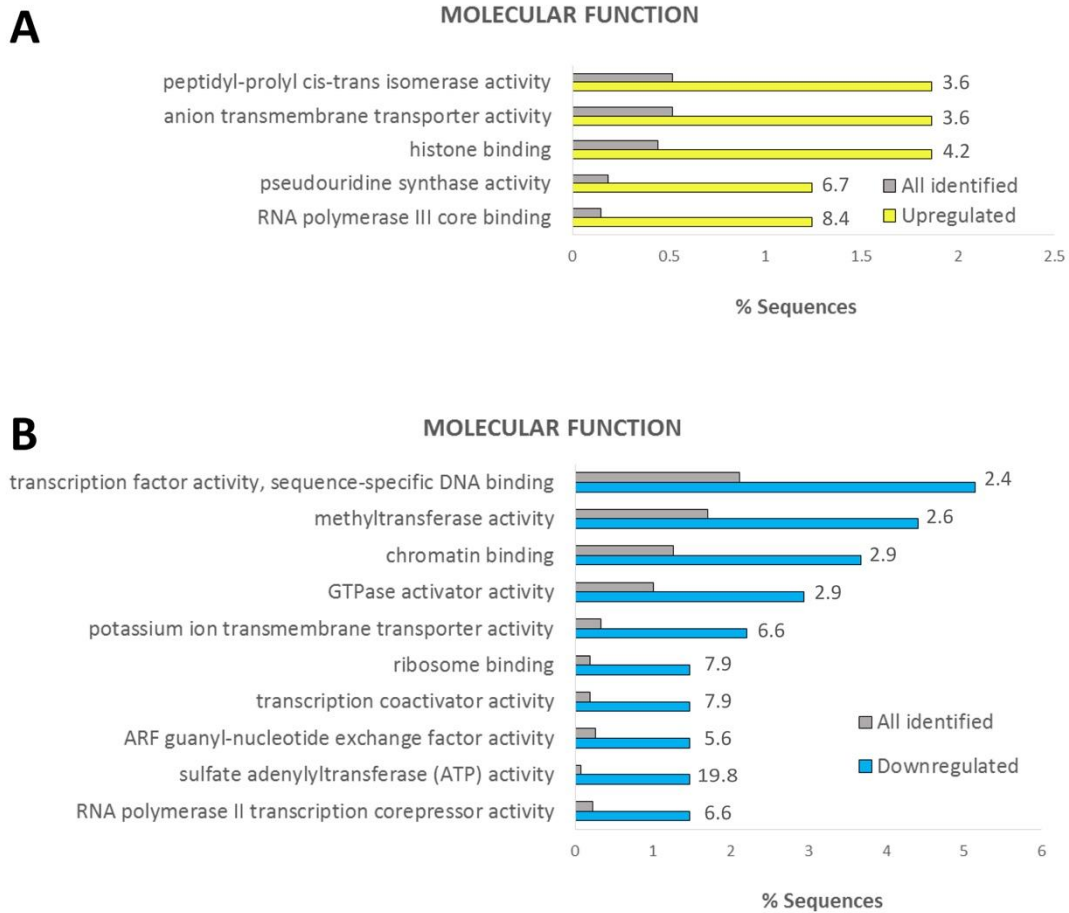

**Figure S4.** Overrepresented GO terms for molecular functions among spikelet proteins with (A) upregulated or (B) downregulated phosphosites. Fold-changes are indicated.

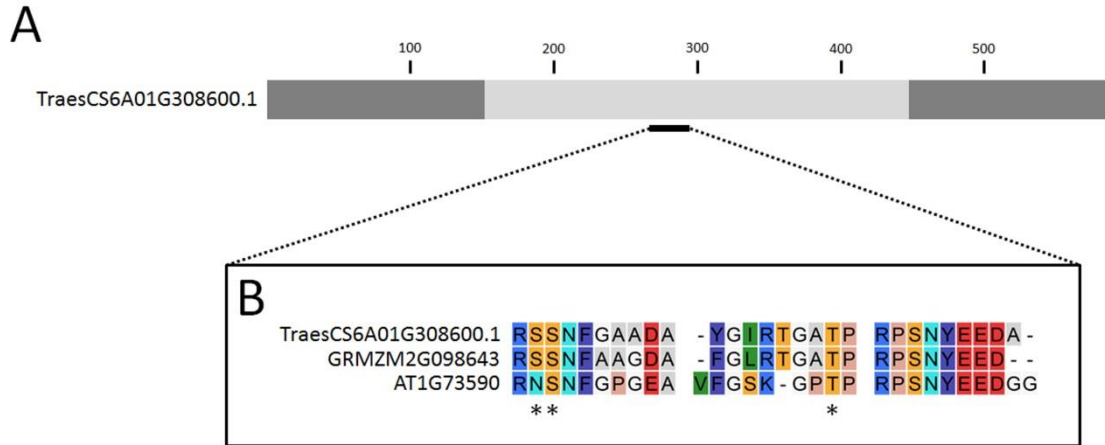

**Figure S5.** Conserved high temperature-regulated *Triticum aestivum* PIN1 phosphosites. **(A)** Schematic of *Triticum aestivum* PIN1 (TraesCS6A01G308600.1) with cytoplasmic loop in pale grey and region containing S268/S269 and T284 marked by black line. **(B)** Sequence alignment of relevant region marked in (A) in PIN1 protein sequences from *Arabidopsis thaliana* (AT1G73590), *Triticum aestivum* (TraesCS6A01G308600.1) and *Zea mays* (PIN1a, GRMZM2G098643).

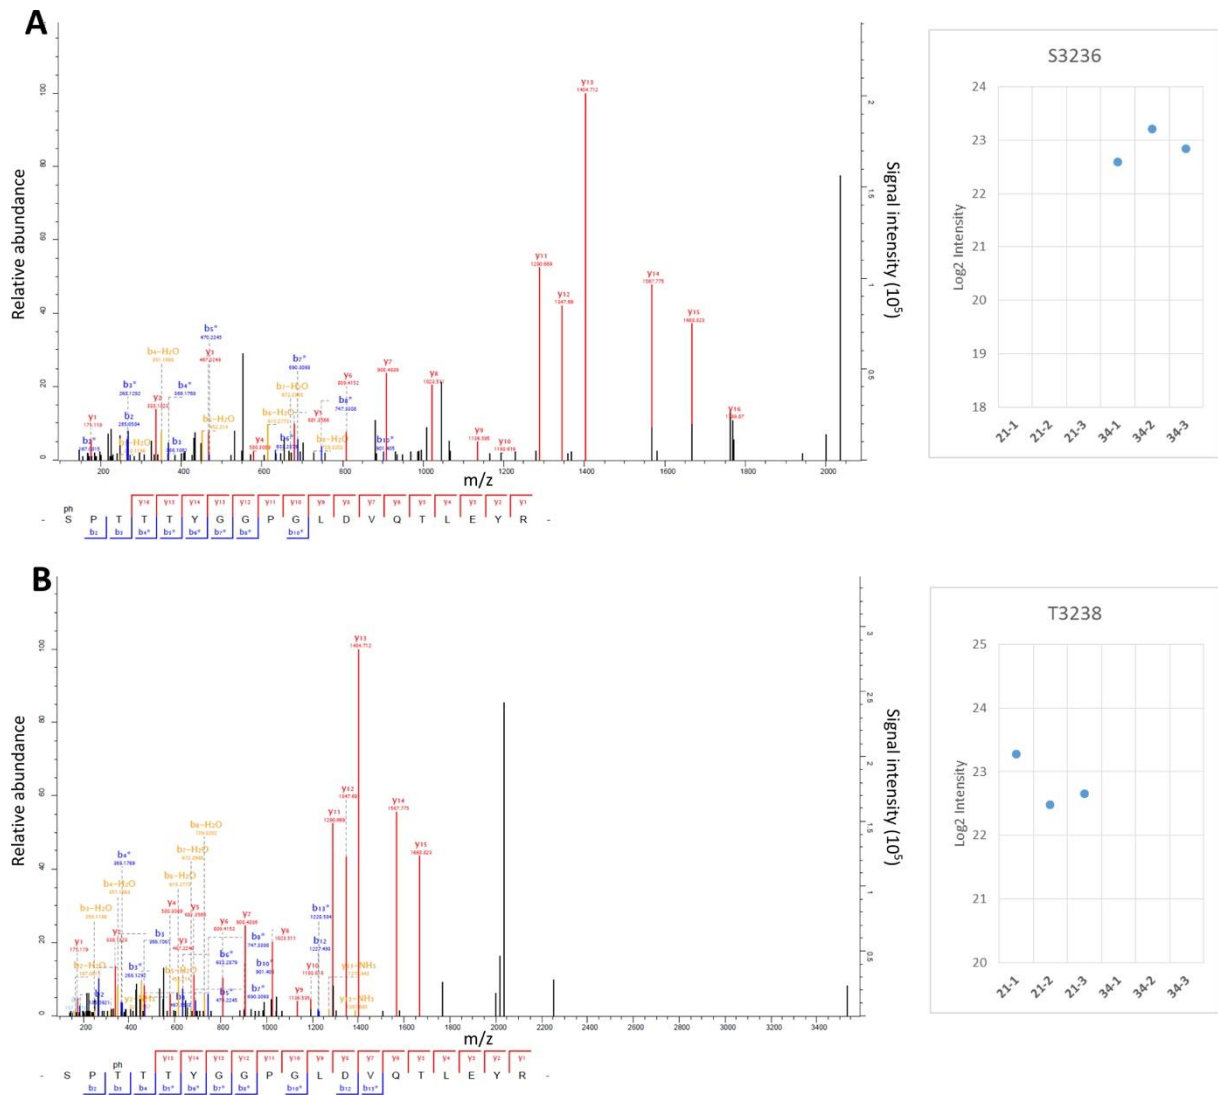

**Figure S6.** Mass spectrum of phosphopeptides containing S3236 (A) and T3238 (B) in SPIRRIG homologue TraesCS5B01G387800.1.

## **SUPPLEMENTARY TABLES**

**Table S1.** Primers used in this study

**Table S2.** Phosphosites identified in wheat leaves

**Table S3.** Phosphosites identified in wheat spikelets

**Table S4.** Phosphosites uniquely present at either 24 °C or 34 °C in wheat leaves

**Table S5.** Phosphosites significantly deregulated at 34 °C (Students' t-test  $p < 0.01$ ) in wheat leaves

**Table S6.** Phosphosites uniquely present at either 21 °C or 34 °C in wheat spikelets

**Table S7.** Phosphosites significantly deregulated at 34 °C (Students' t-test  $p < 0.01$ ) in wheat spikelets

**Table S8.** Phosphosites that is commonly upregulated or downregulated at 34 °C in both leaves and spikelets

**Table S9.** Kinases with deregulated phosphosites in this study

**Table S10.** List of proteins with multiple upregulated or multiple downregulated phosphosites



## SUPPLEMENTARY PROTOCOL S1

### *Protein Extraction and Phosphopeptide Enrichment*

Total protein extraction was conducted on three biological replicate samples (leaf and flower material from independent plants) per wheat cultivar according to our previously described procedure with minor modifications (Vu *et al.*, 2017). One gram of finely ground leaf and spikelet material was suspended in homogenization buffer containing 30% sucrose, 250 mM Tris-HCl buffer (pH 8), 5 mM EDTA, and 500 mM DTT in Milli-Q water, to which the appropriate amounts of the cOmplete™ protease inhibitor mixture (Roche) and the PhosSTOP phosphatase inhibitor mixture (Roche) were added. The samples were sonicated on ice and centrifuged at 4°C for 15 min at 2500 g to remove debris. Supernatants were collected and a methanol/chloroform precipitation was carried out by adding 3, 1, and 4 volumes of methanol, chloroform and water, respectively. Samples were centrifuged for 10 min at 5000 g and the aqueous phase was removed. After addition of four volumes of methanol, the proteins were pelleted via centrifugation for 10 min at 2500 g. Pellets were washed with 80% acetone, centrifuged for 10 min at room temperature at 2500 g. The supernatants were discarded and the pellets were let to dry on air. Protein pellets were then re-suspended in 8 M ureum in 50 mM triethylammonium bicarbonate (TEAB) buffer (pH 8). Alkylation of cysteines was carried out by adding tris(carboxyethyl)phosphine (TCEP, Pierce) and iodoacetamide (Sigma-Aldrich) to final concentrations of 15 mM and 30 mM, respectively, and the samples were incubated for 15 min at 30°C in the dark. Five mg of protein material was pre-digested with MS-grade lysyl endopeptidase (Wako Chemicals) for 4 h at 37°C at an enzyme-to-substrate ratio of 1:500 (w:w). The mixtures were diluted 8-fold with 50 mM TEAB, followed by an overnight digestion with trypsin (Promega) with an enzyme-to-substrate ratio of 1:100. The digest was acidified to pH 3 with trifluoroacetic acid (TFA) and desalted using SampliQ C18 SPE cartridges (Agilent) according to the manufacturer's guidelines. For phosphopeptide

enrichment, the desalted peptides were fully dried in a vacuum centrifuge and then re-suspended in 500  $\mu$ l of loading solvent [80% (v/v) acetonitrile, 5% (v/v) TFA].

### ***Phosphopeptide Enrichment***

The enrichment for the phosphopeptide procedure was performed as reported previously (Vu *et al.*, 2017). The re-suspended peptides were incubated with 1 mg MagReSyn® Ti-IMAC microspheres for 20 min at room temperature with continuous mixing. The microspheres were washed once with wash solvent 1 (60% acetonitrile, 1% TFA, 200 mM NaCl) and twice with wash solvent 2 (60% acetonitrile, 1% TFA). The bound phosphopeptides were eluted with three volumes (80  $\mu$ l) of elution buffer (40% acetonitrile, 5%  $\text{NH}_4\text{OH}$ ), immediately followed by acidification to pH 3 using 100% formic acid. Prior to MS analysis, the samples were vacuum dried and re-dissolved in 50  $\mu$ l of 2% (v/v) acetonitrile and 0.1% (v/v) TFA.

### ***Database searching***

MS/MS spectra were searched against the unpublished IWGSC RefSeq v1.0 database for *Triticum aestivum* (137052 entries) (<https://www.wheatgenome.org/News2/Annotation-RefSeq-v1.0-URGI>) with the MaxQuant software (version 1.5.4.1). For comparison, a second search against the earlier version of IWGSC popseq PGSB/MIPS v2.2 database (100344 entries), downloaded from [wheatproteome.org](http://wheatproteome.org), was performed. A precursor mass tolerance set to 20 ppm for the first search (used for non-linear mass re-calibration) and to 4.5 ppm for the main search. Trypsin was selected as enzyme setting. Cleavages between lysine/arginine-proline residues and up to two missed cleavages were allowed. S-carbamidomethylation of cysteine residues was selected as a fixed modification and oxidation of methionine residues was selected as a variable modification. The false discovery rate for peptide and protein identifications was set to 1%, and the minimum peptide length was set to 7. The minimum

score threshold for both modified and unmodified peptides was set to 30. The MaxLFQ algorithm allowing for label-free quantification (Cox *et al.*, 2014) and the ‘matching between runs’ feature were enabled. For calculation of protein ratios, both unique and razor peptides (non-unique peptides that are assigned to a protein group with the largest number of identified peptides) were selected.

## **SUPPLEMENTARY DATASET**

*Representative MS/MS spectra of discussed phosphopeptides*

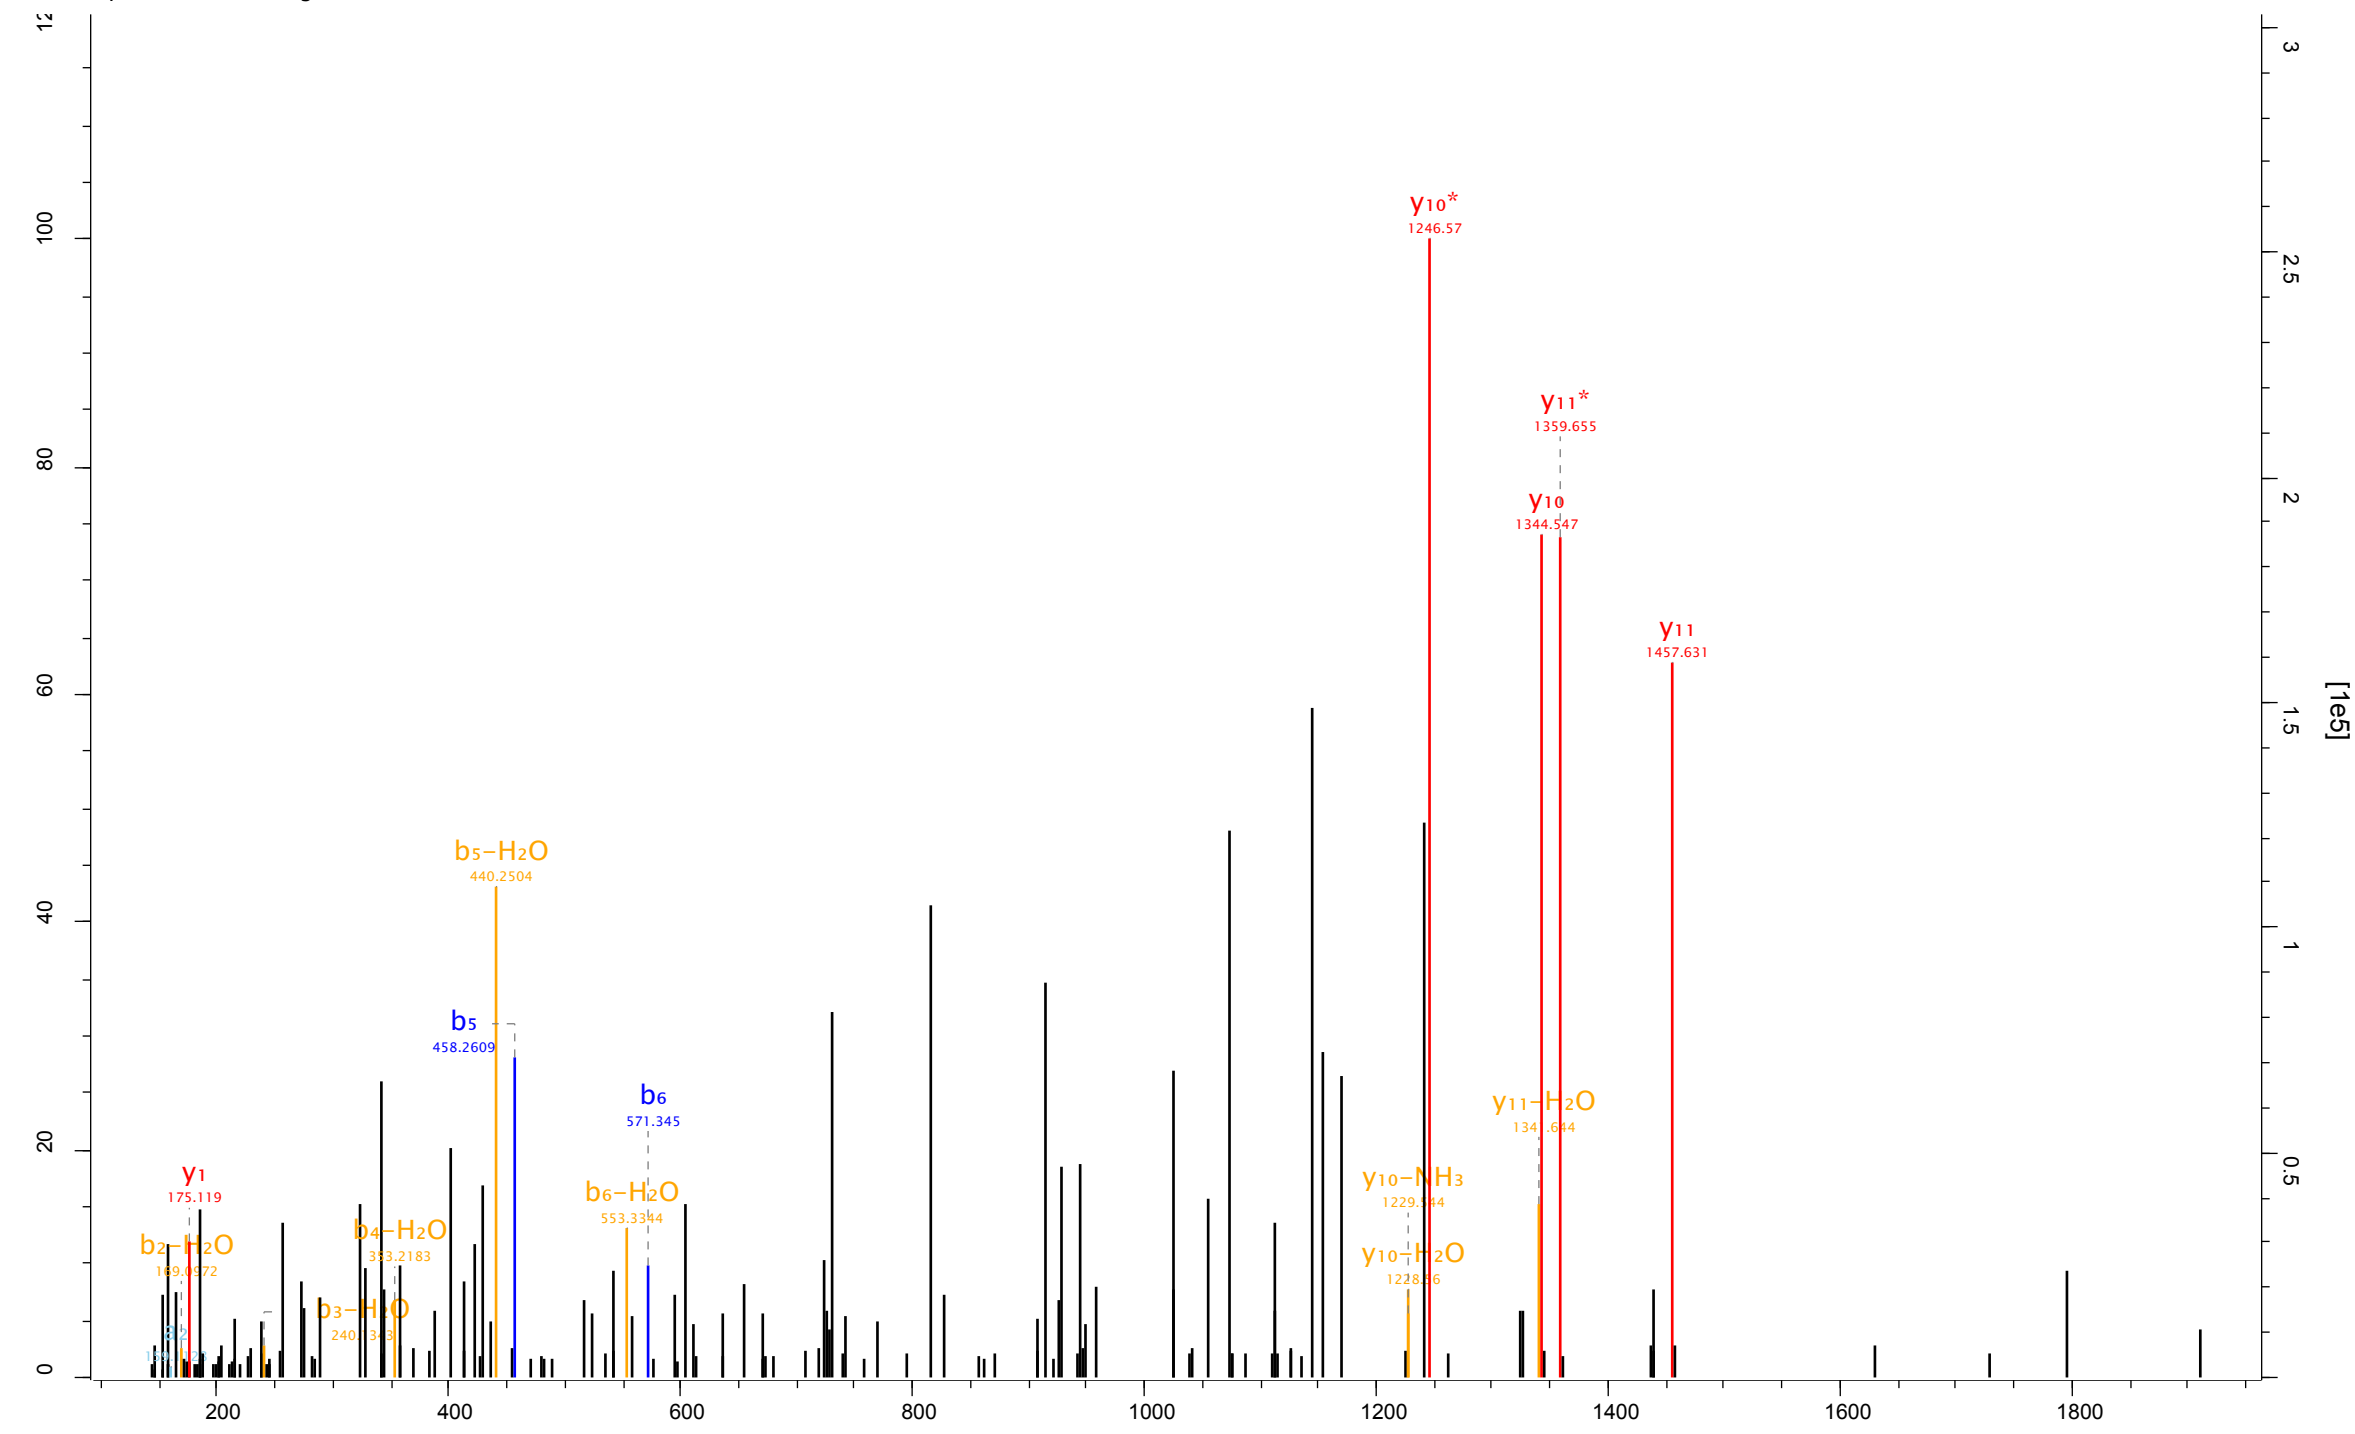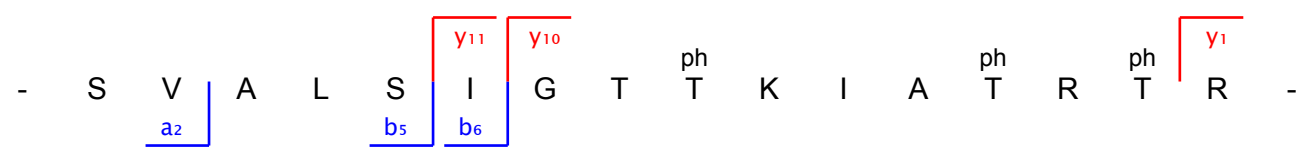

TraesCS2A01G235000.1 - T33 & T37 & T39

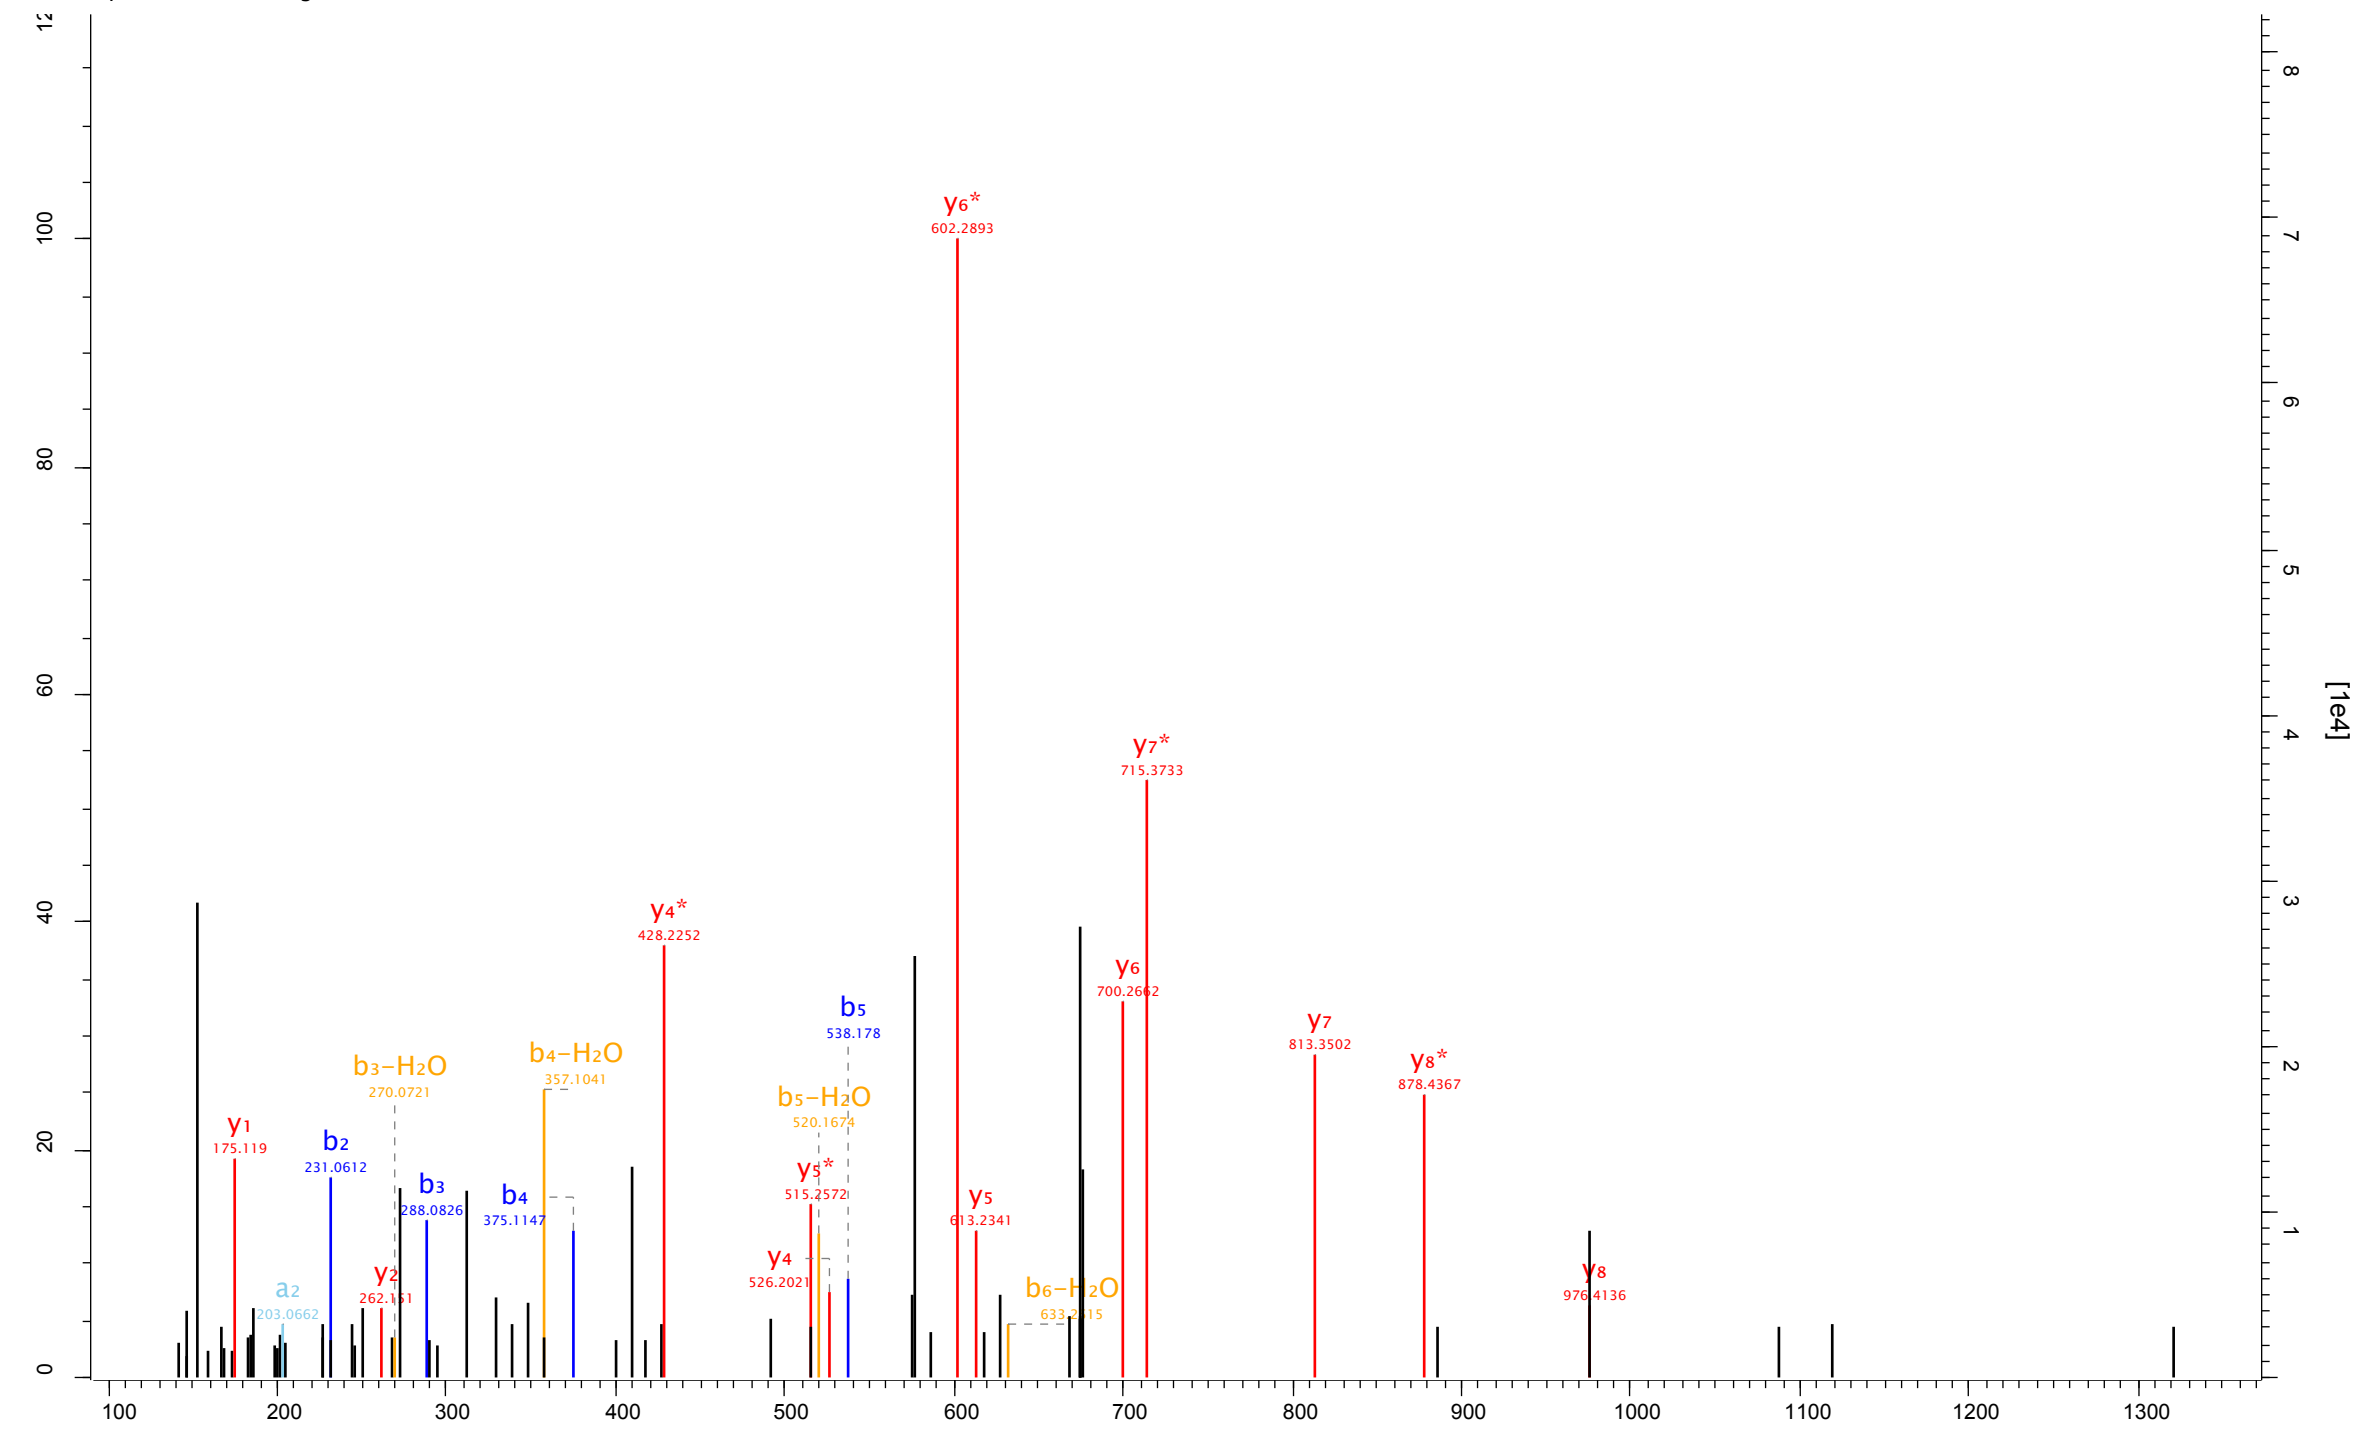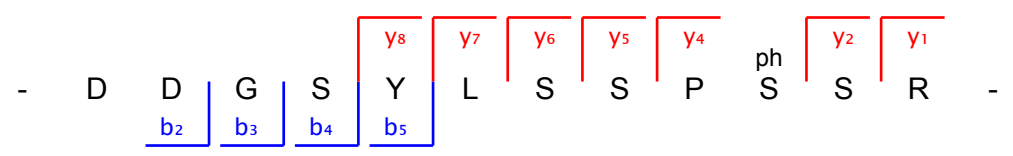

TraesCS1D01G422700.2 - S157

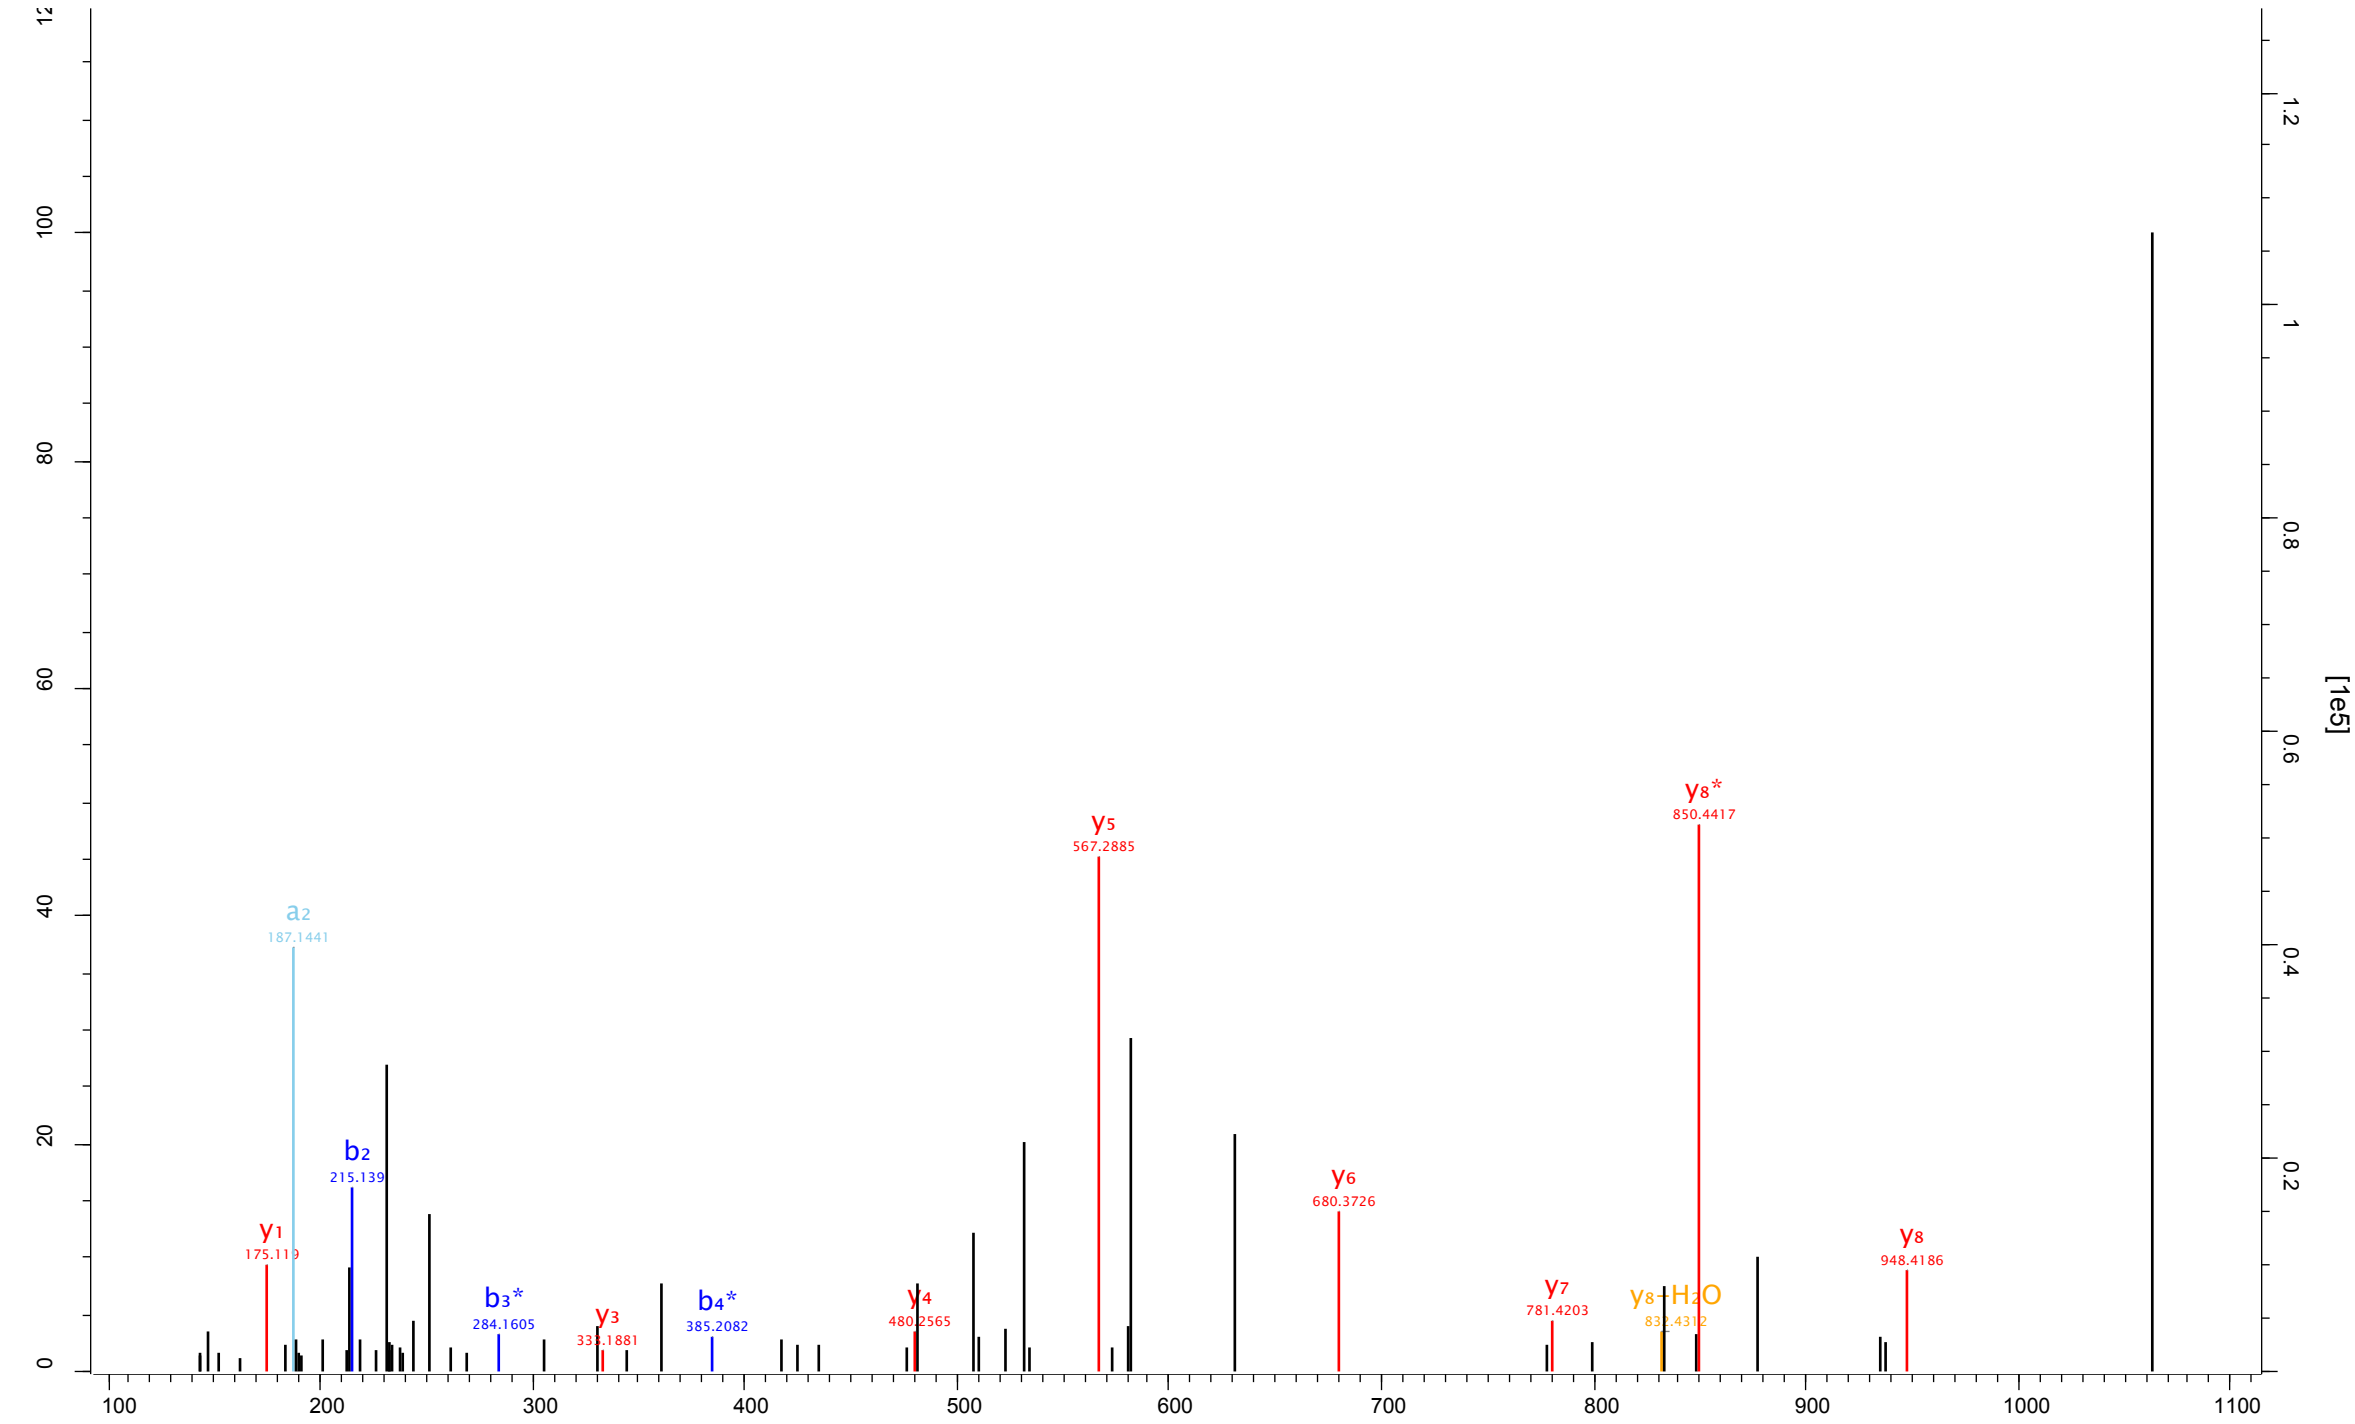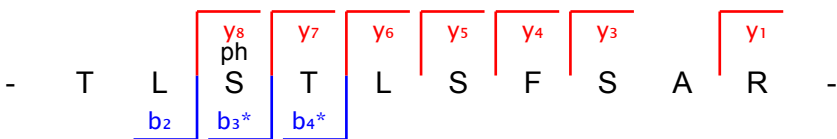

TraesCS7D01G176200.1 - S444

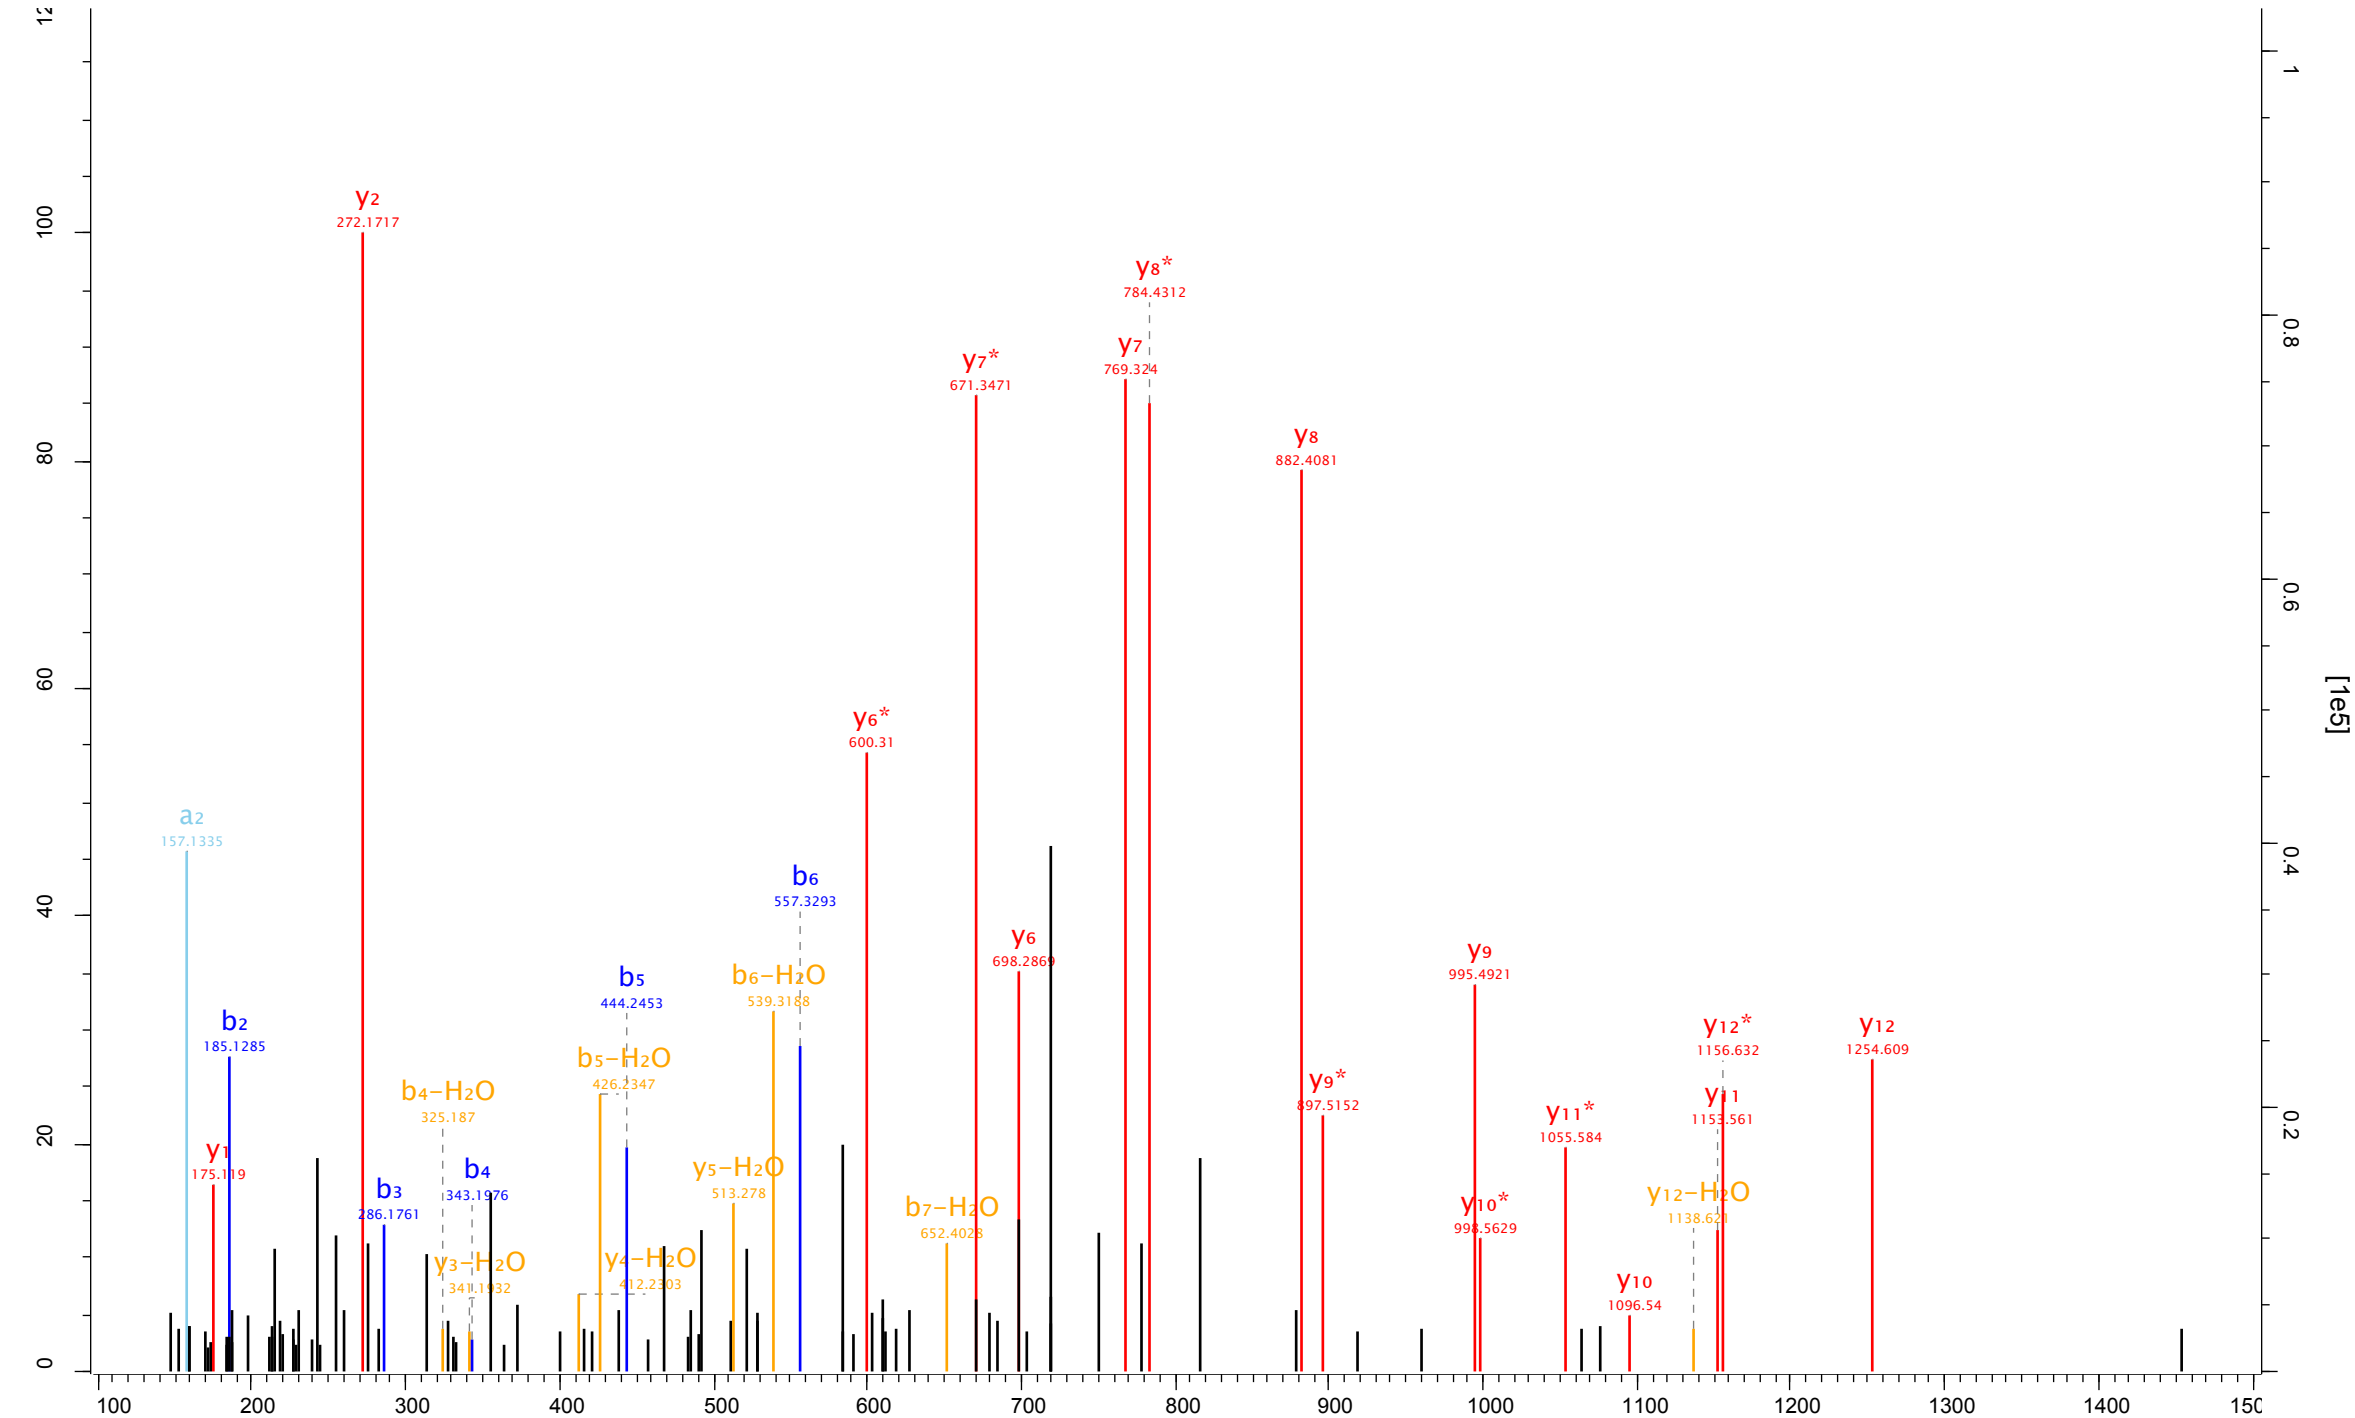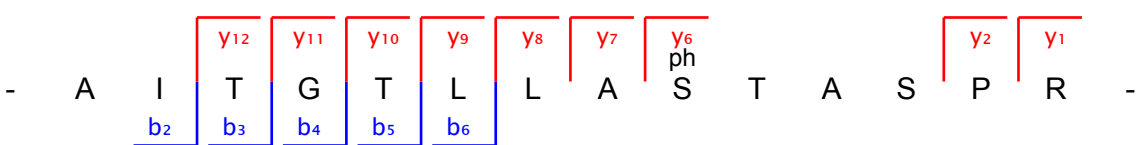

TraesCS5D01G389200.2 - S525



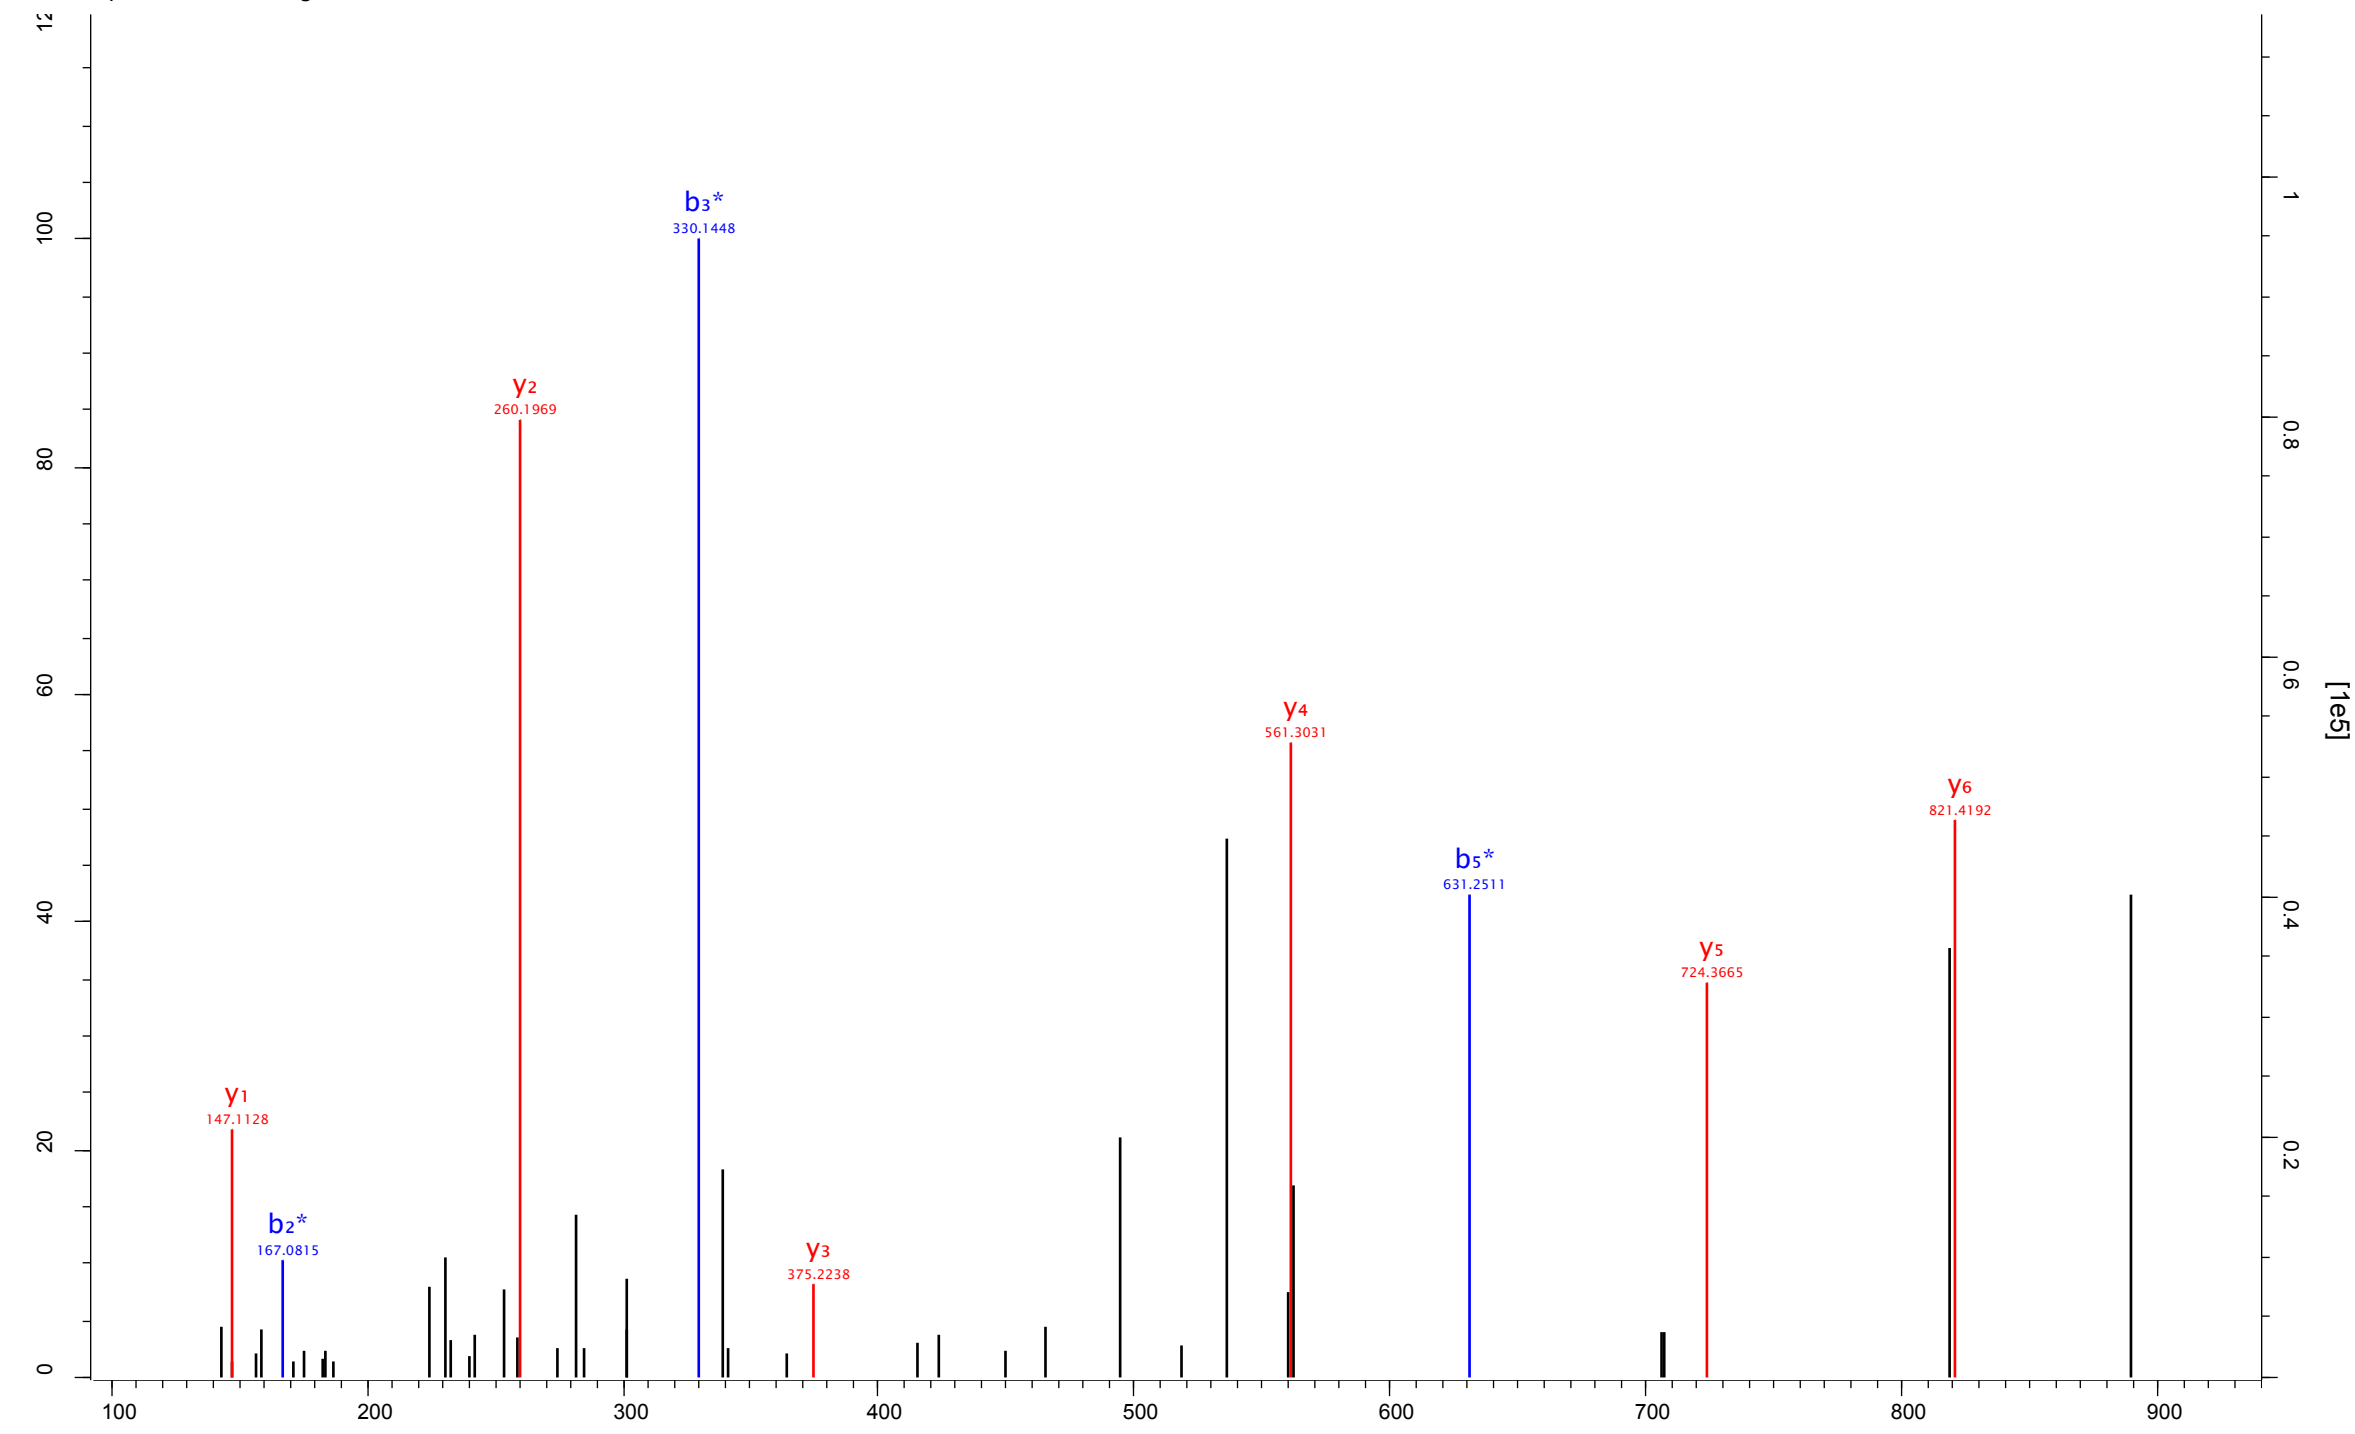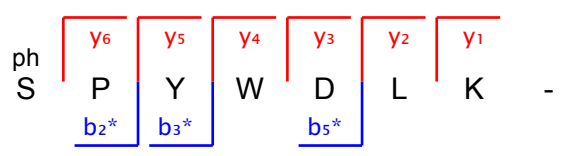

TraesCS2B01G290500.3 - S294

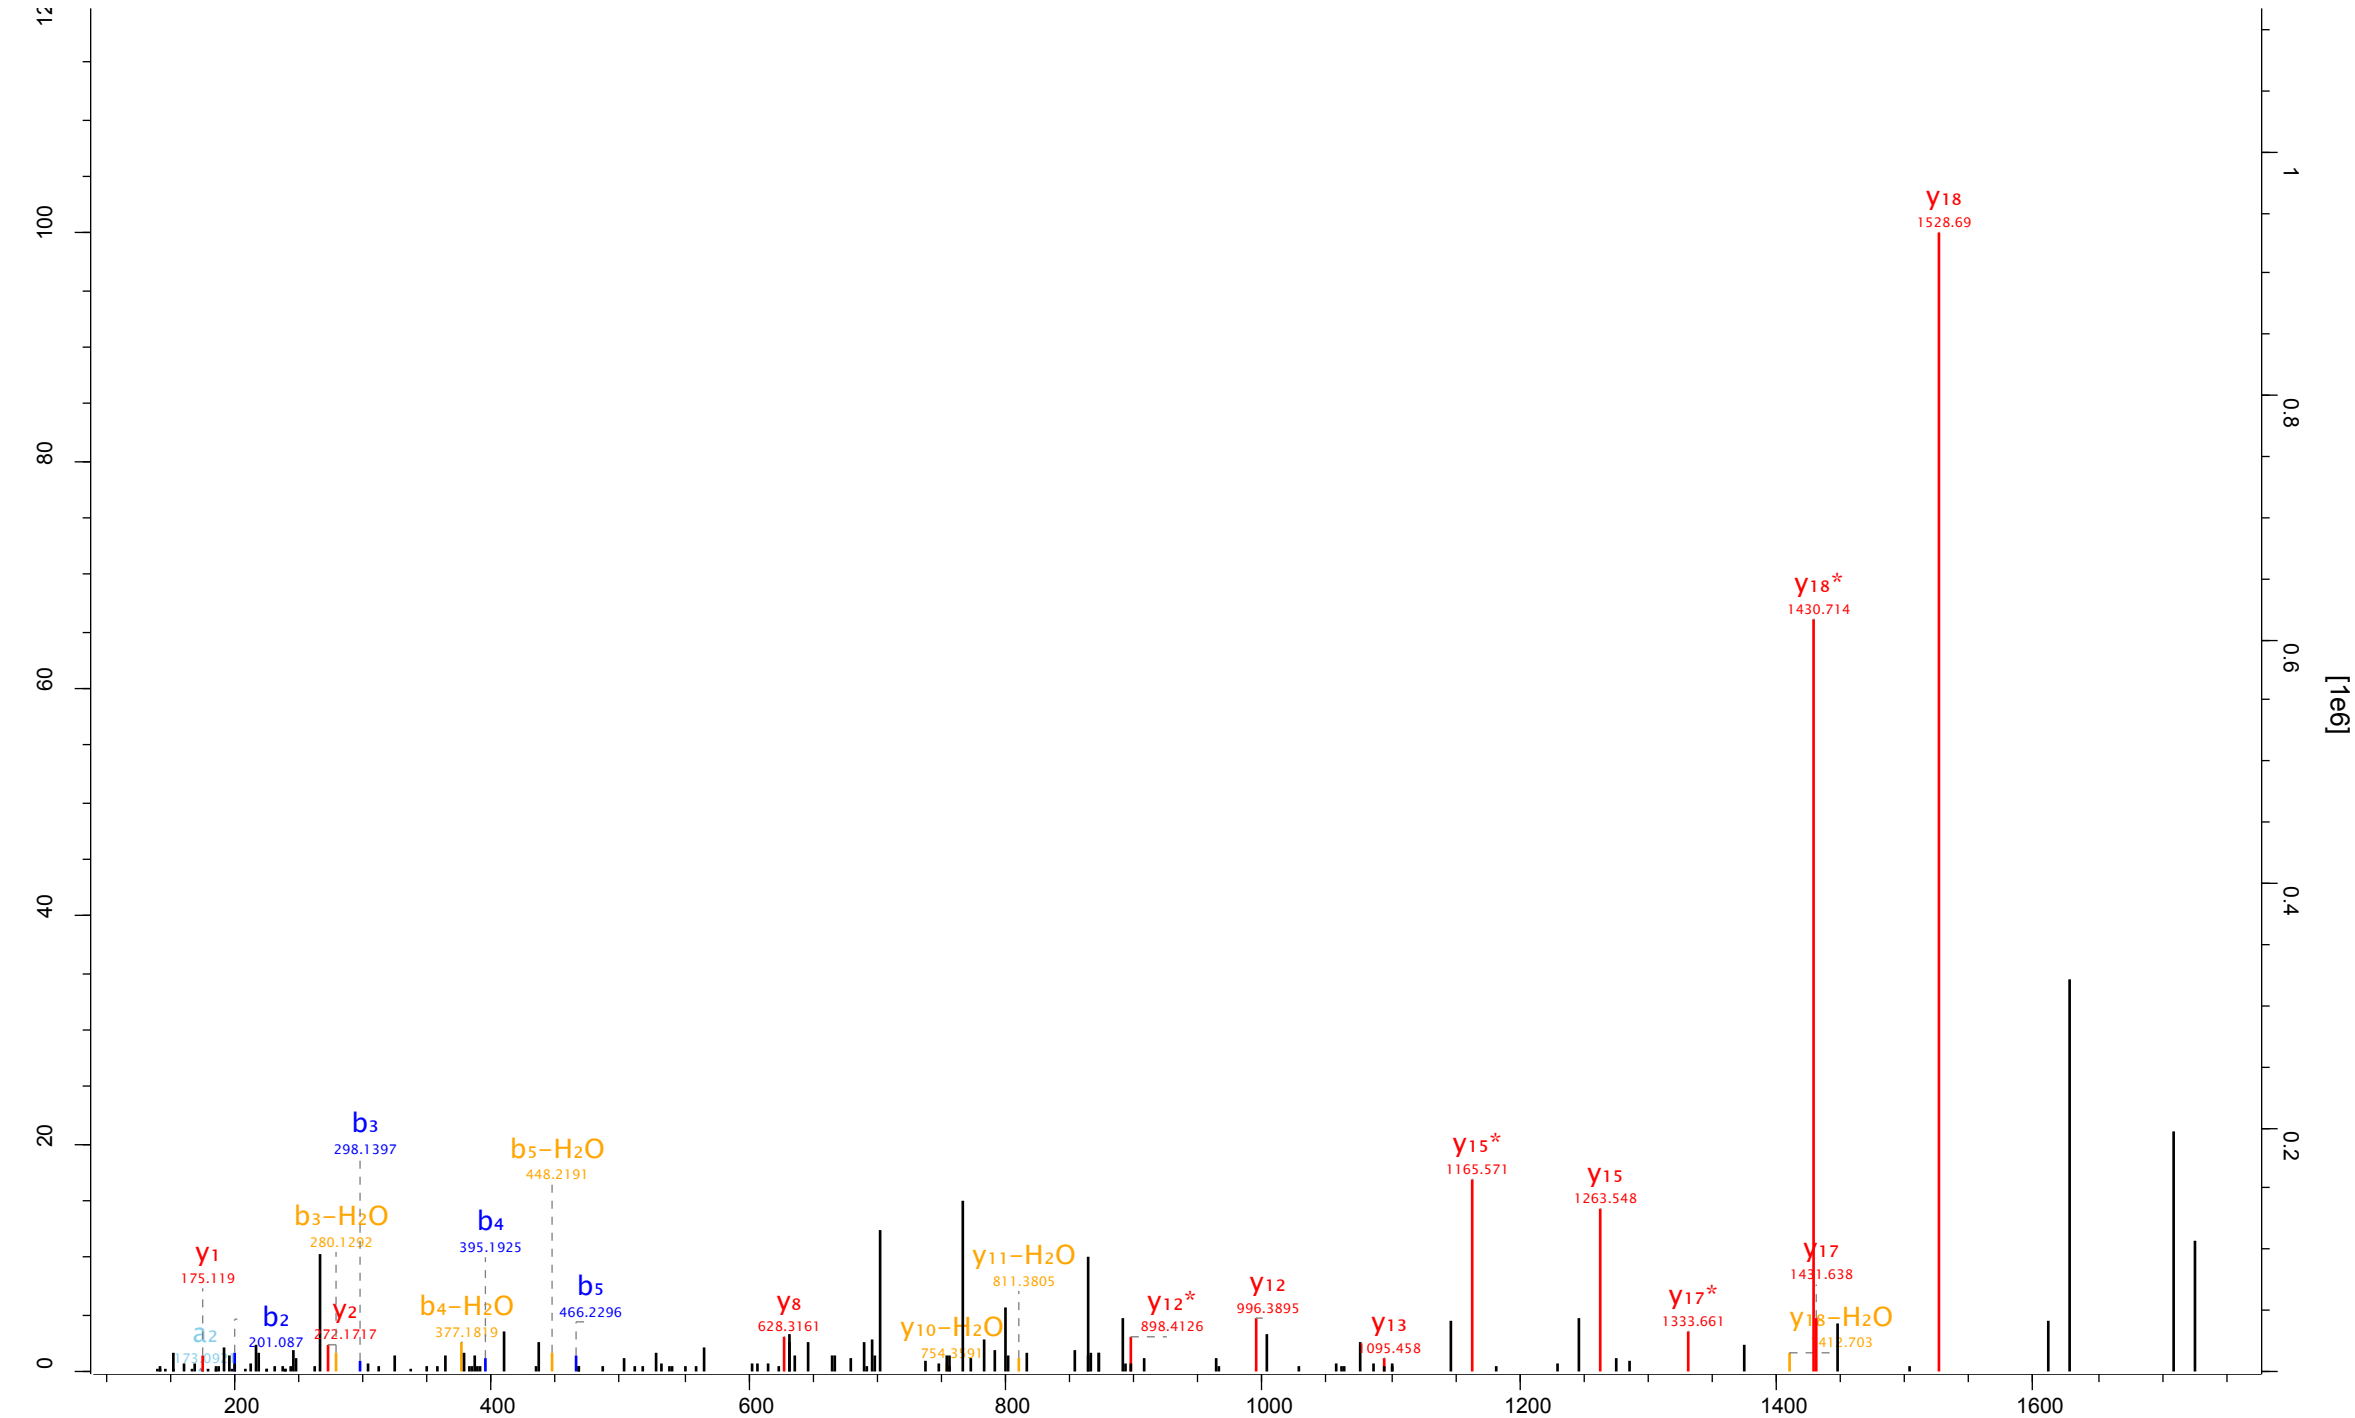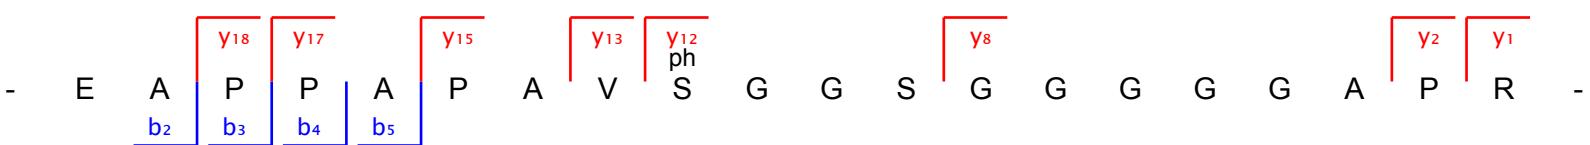

TraesCS5D01G132600.1 - S31

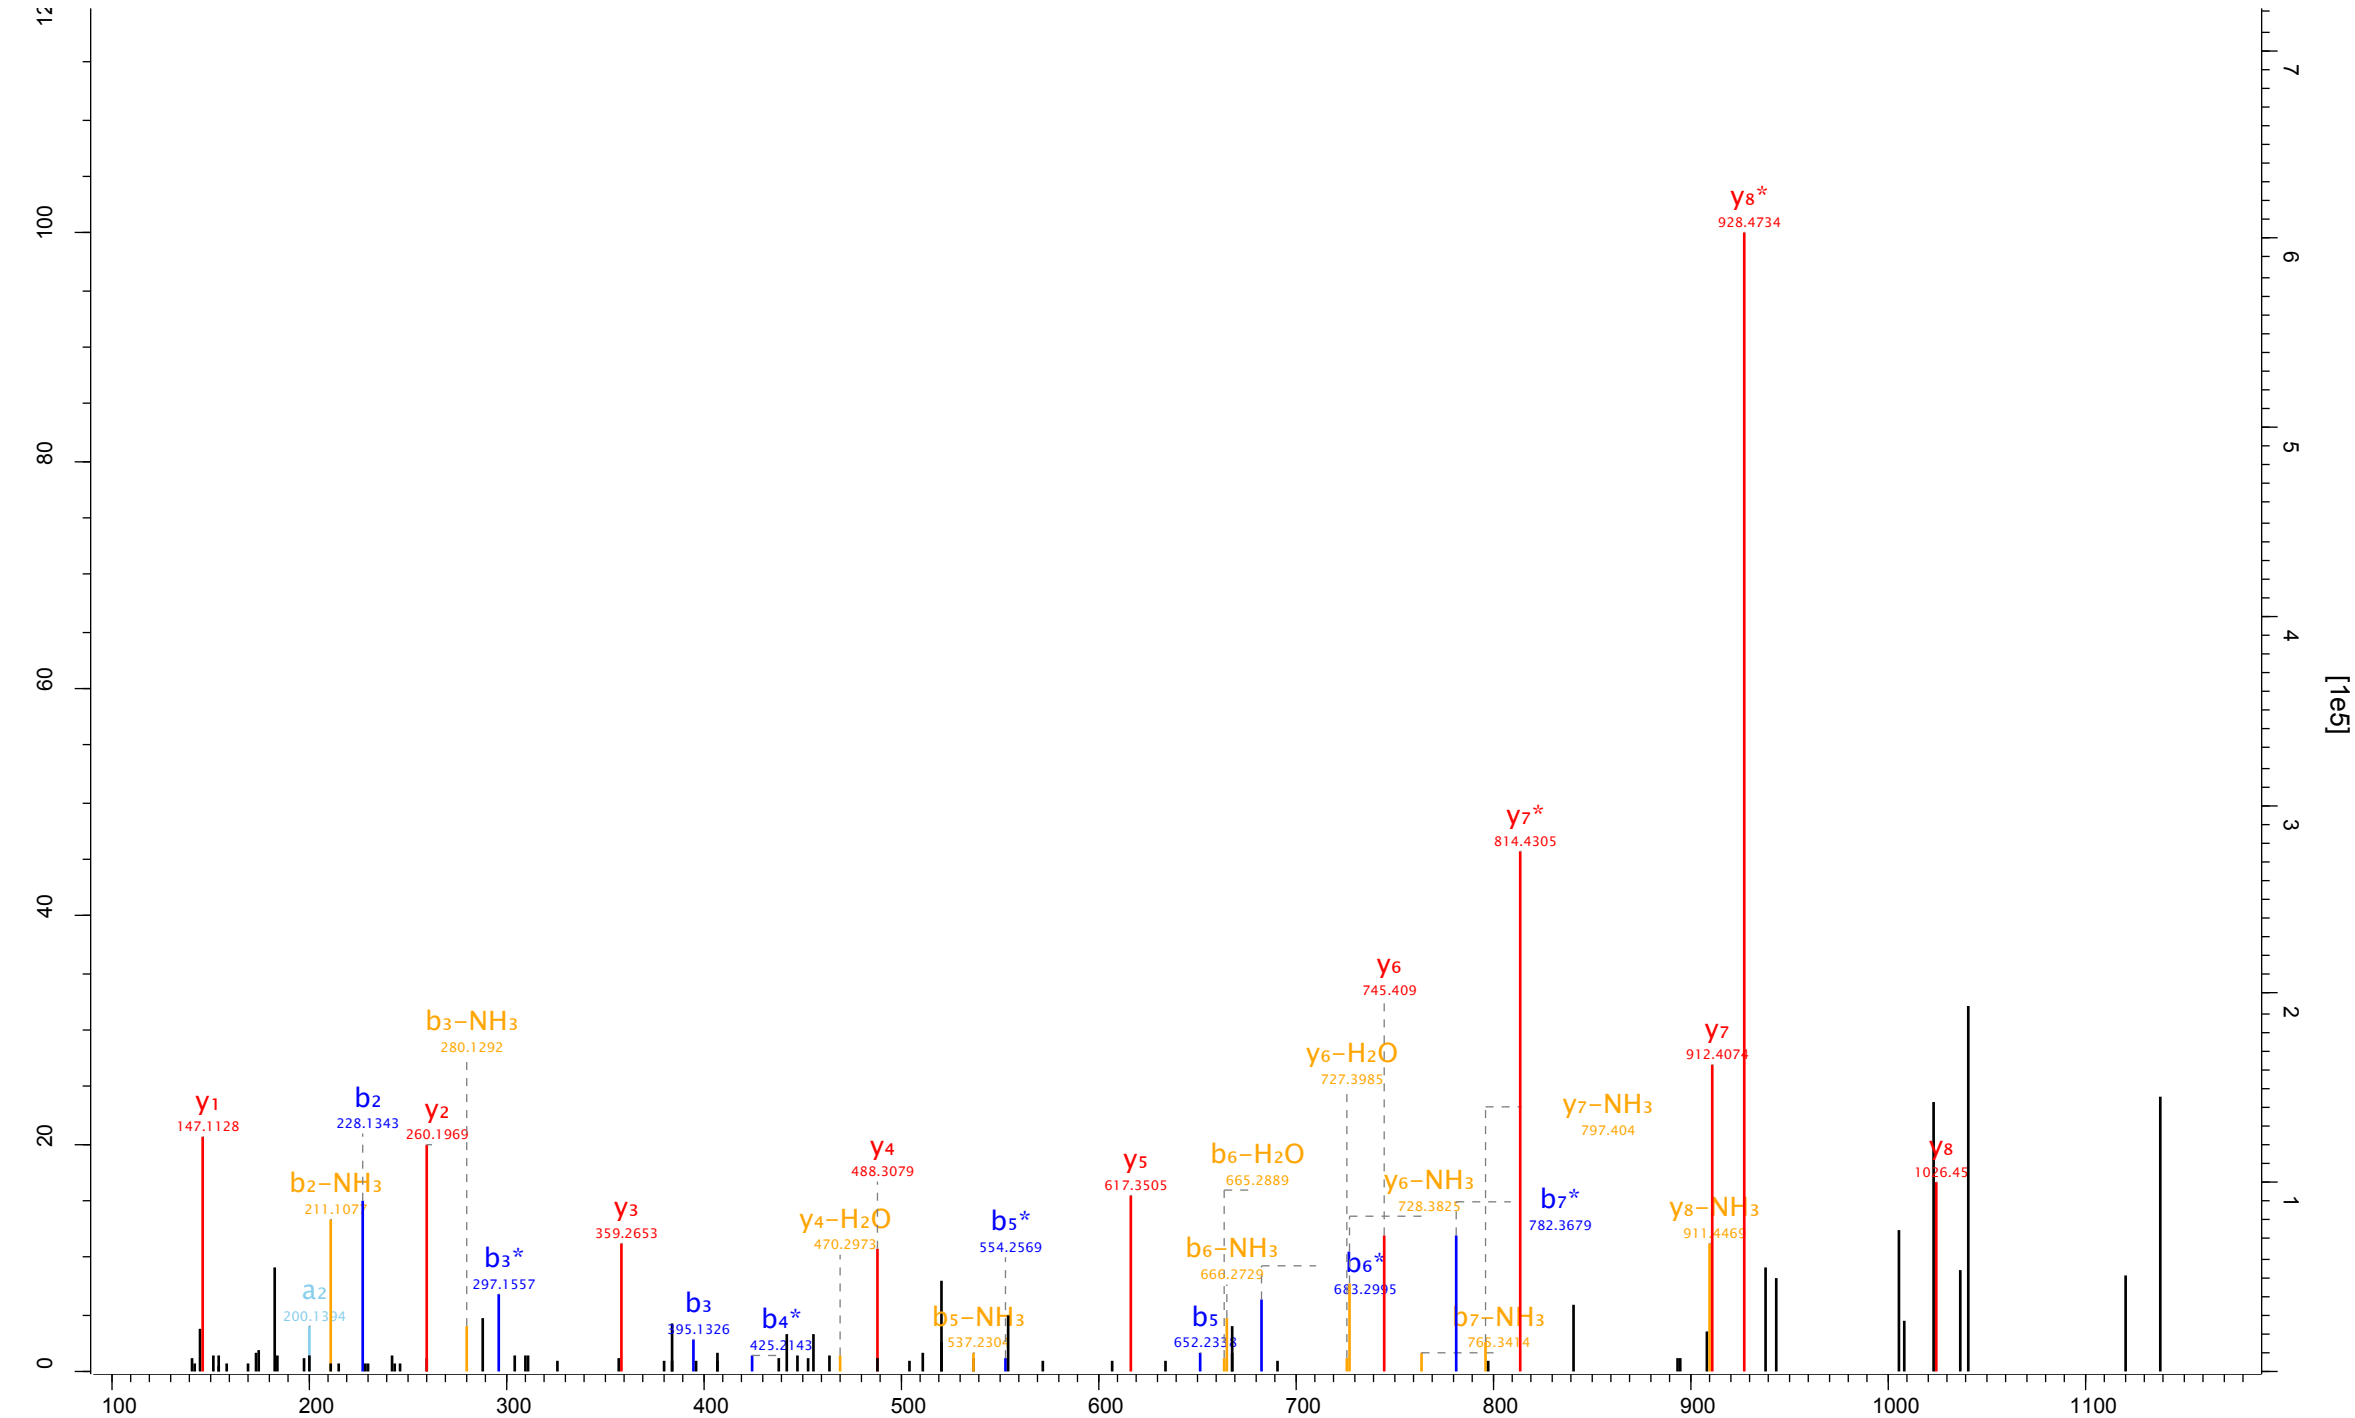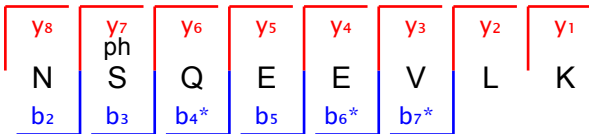

TraesCS4A01G328600.1 - S404

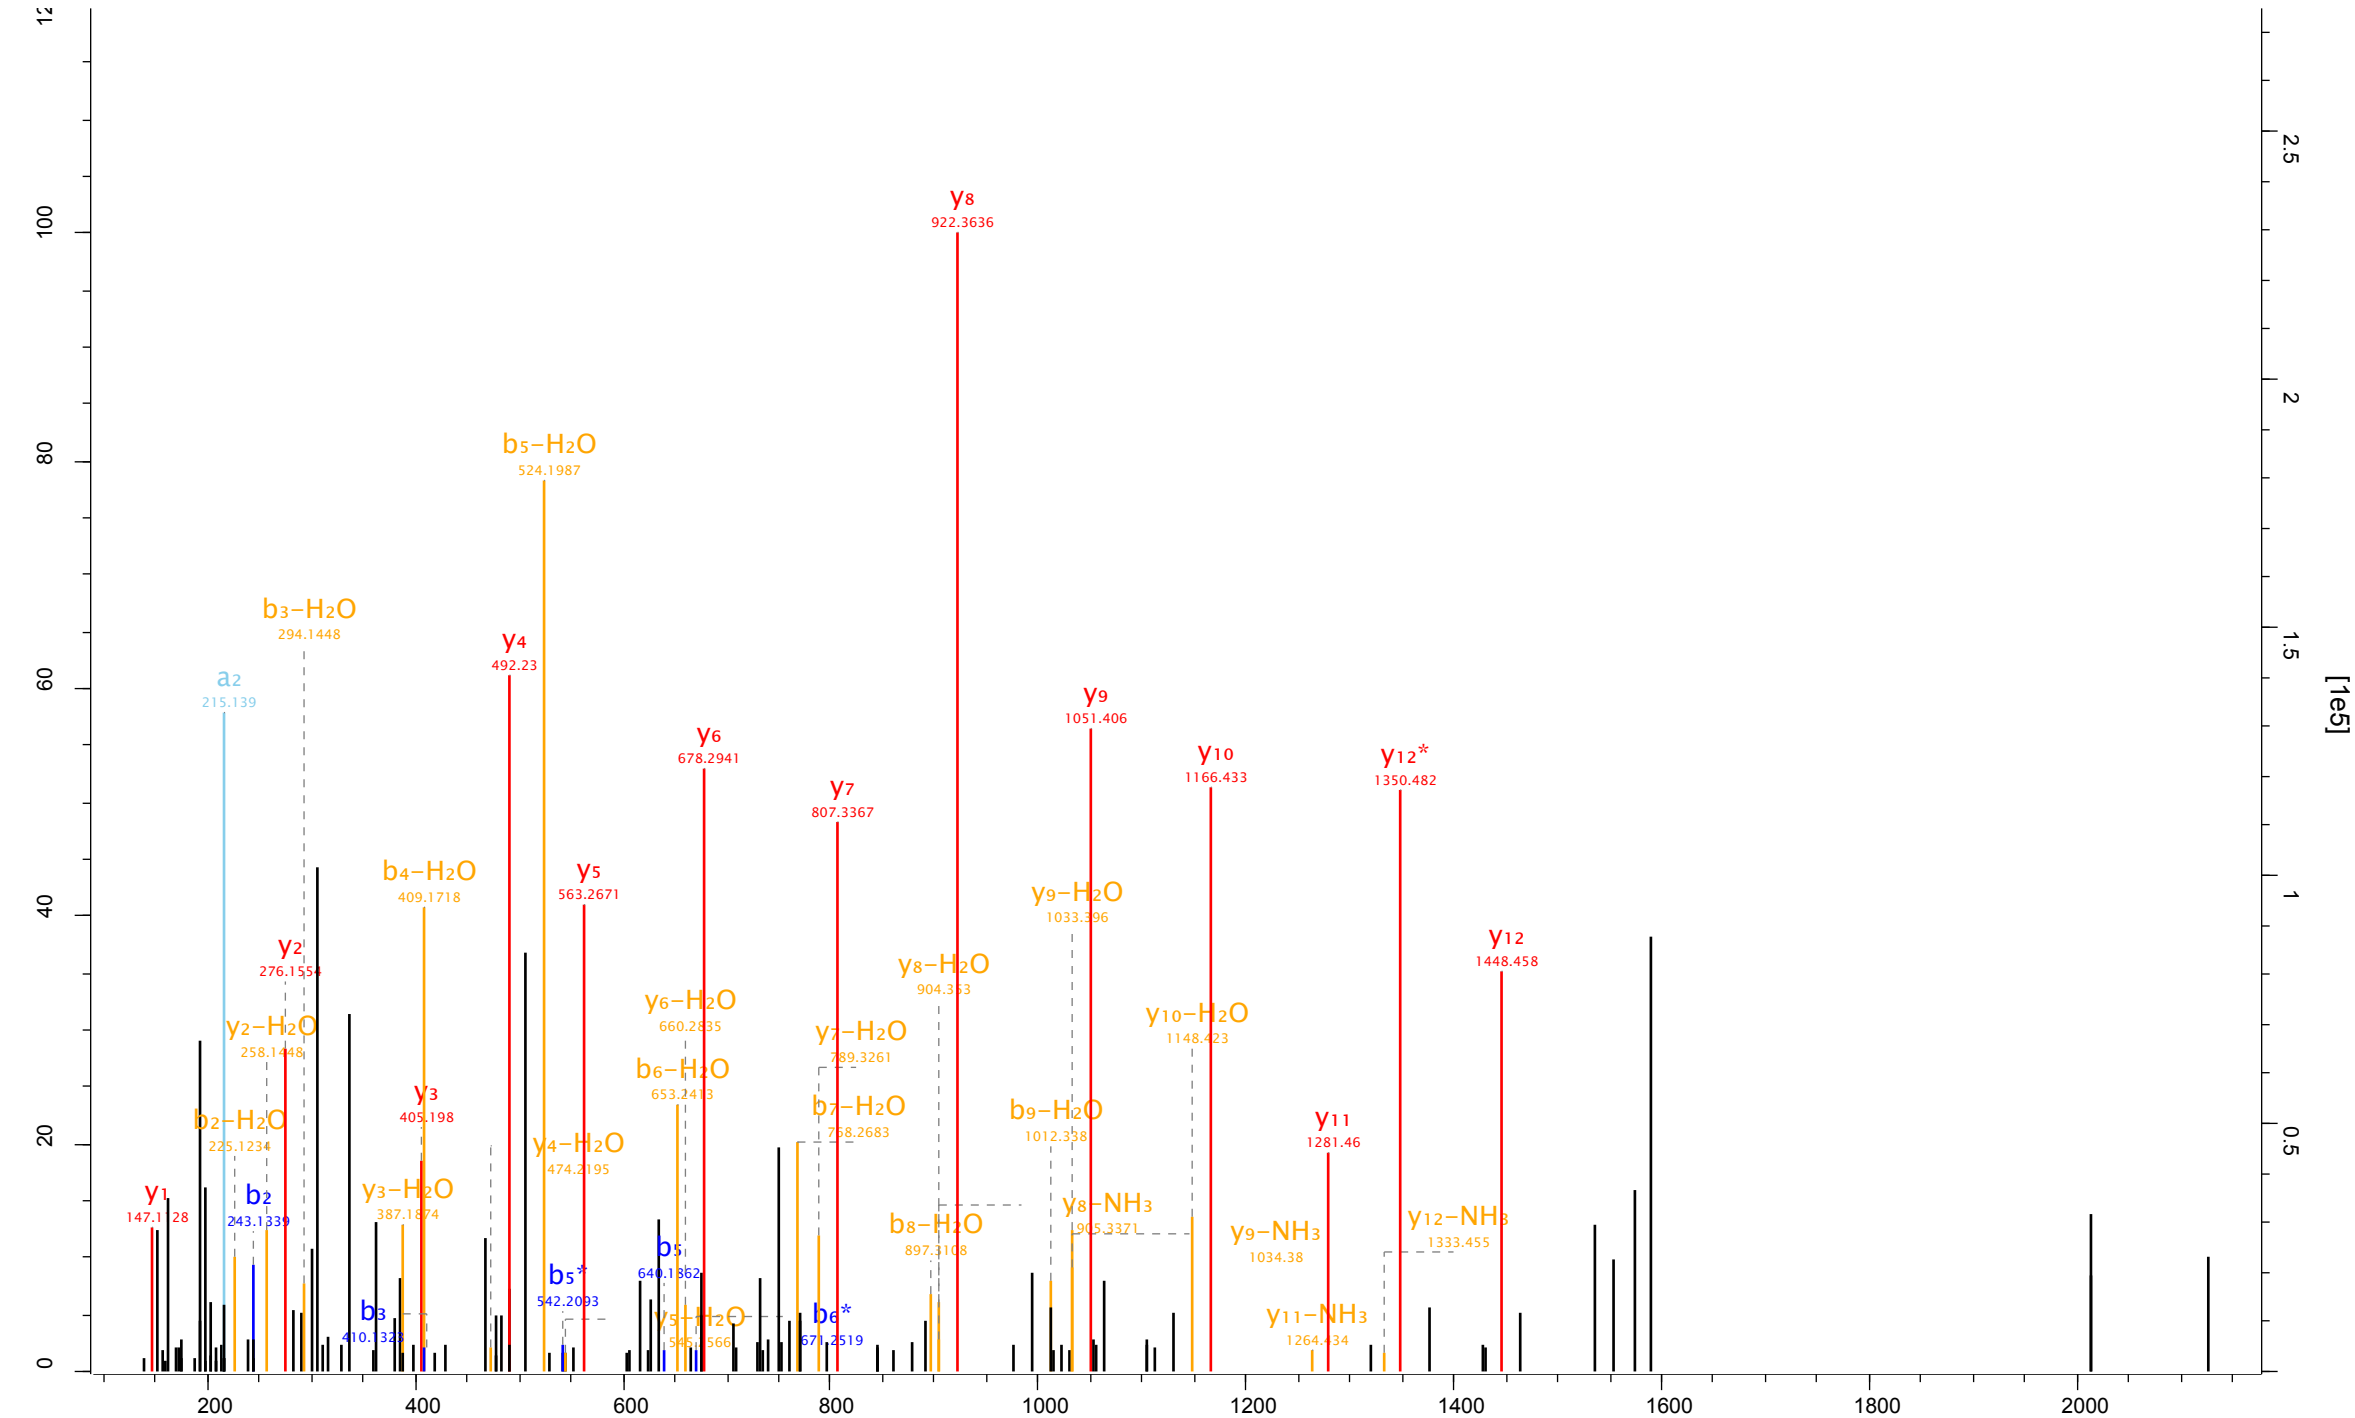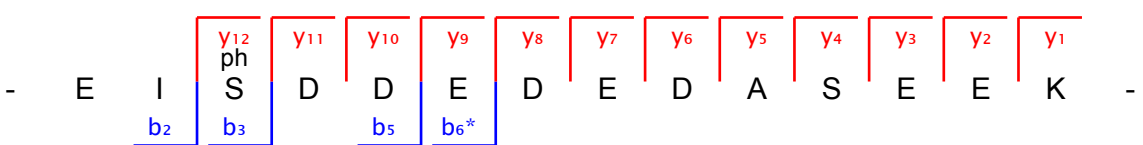

TraesCS2A01G033700.1 - S224

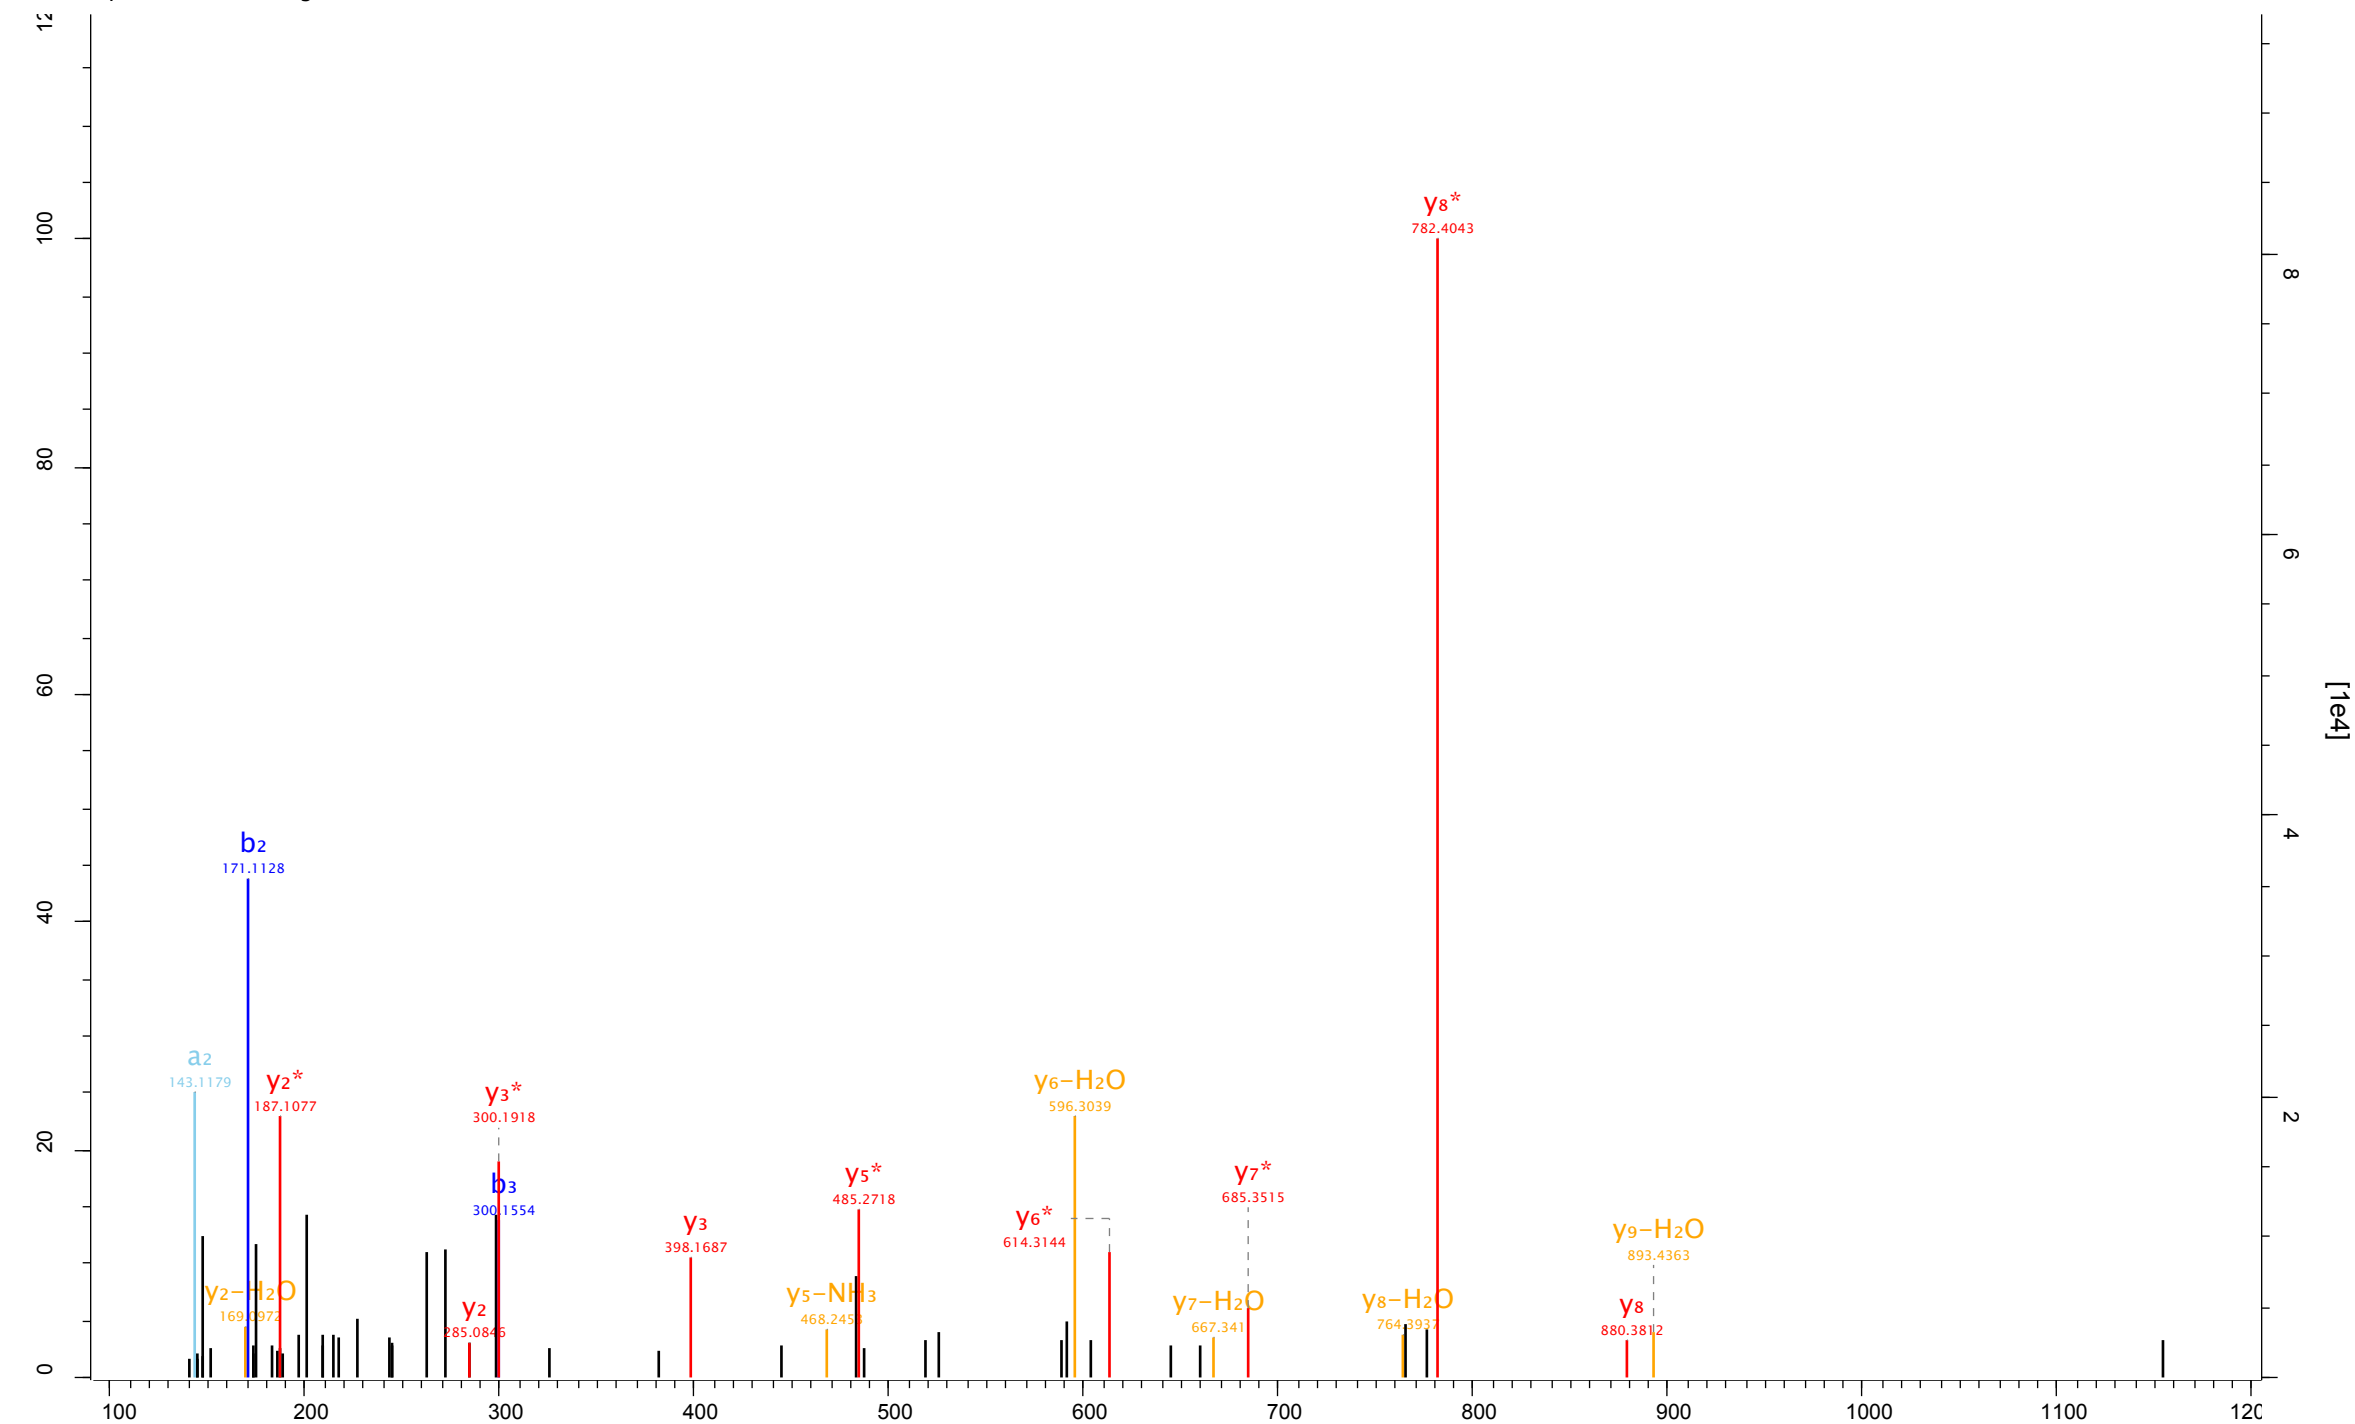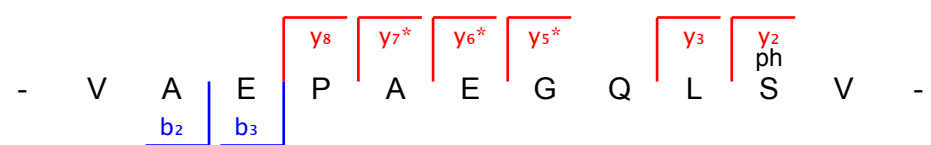

TraesCSU01G009200.1 - S577

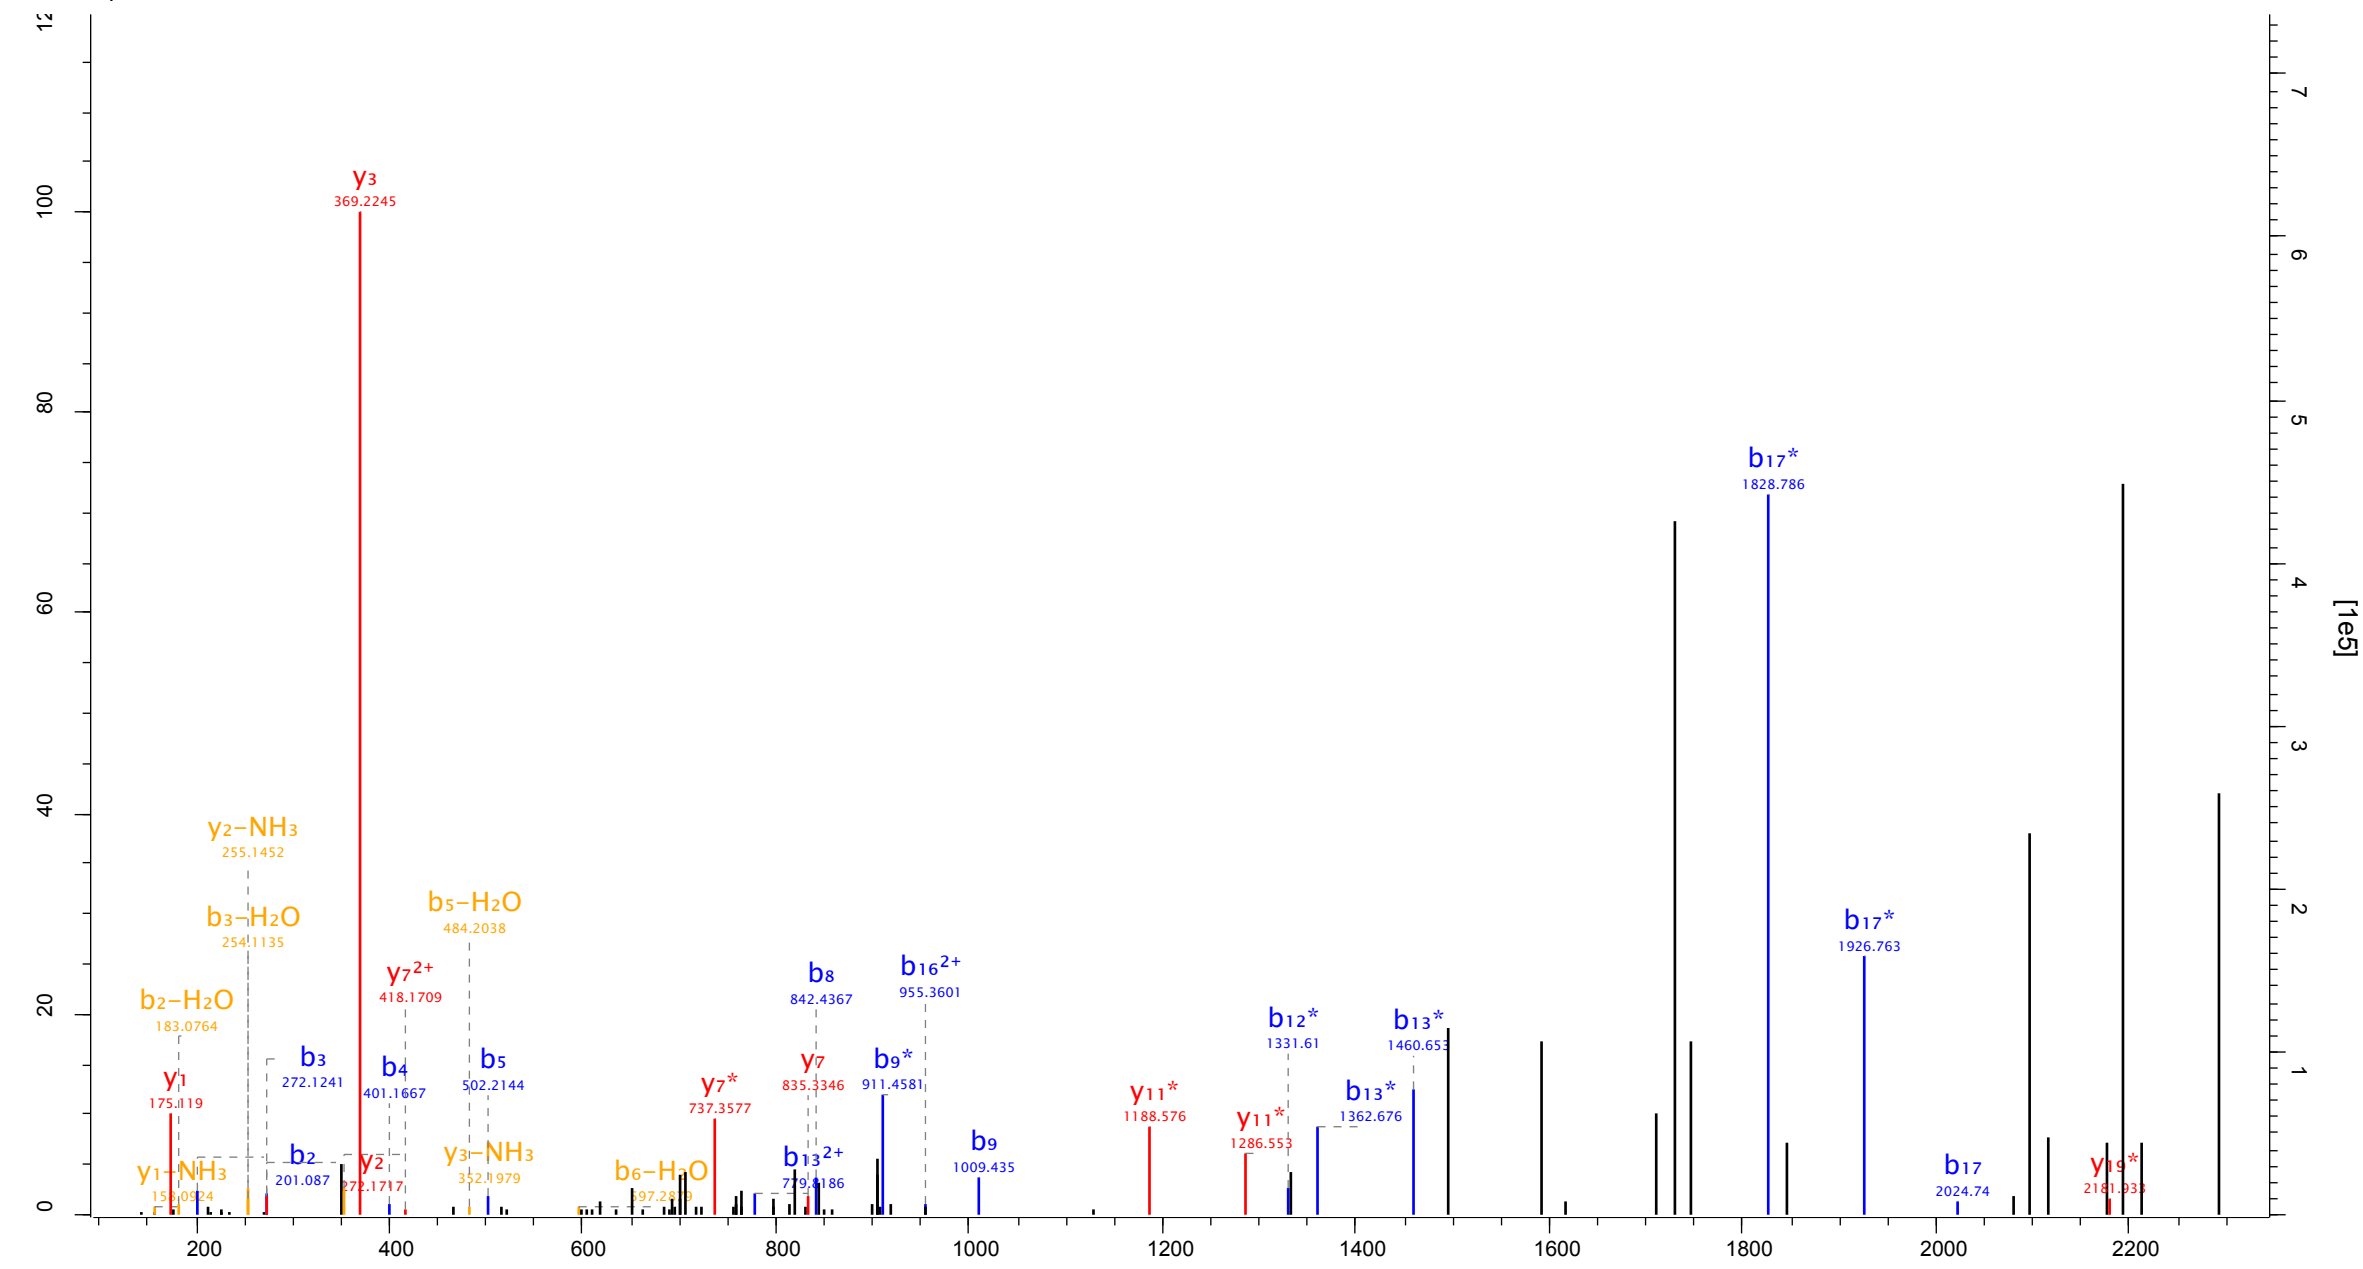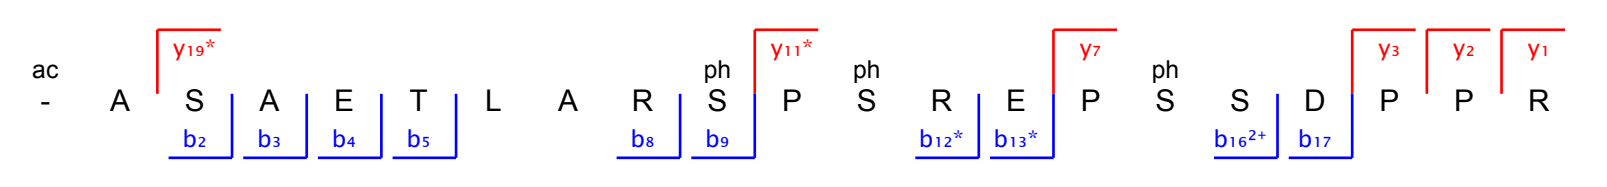

TraesCS2D01G281200.1 - S10 & S12

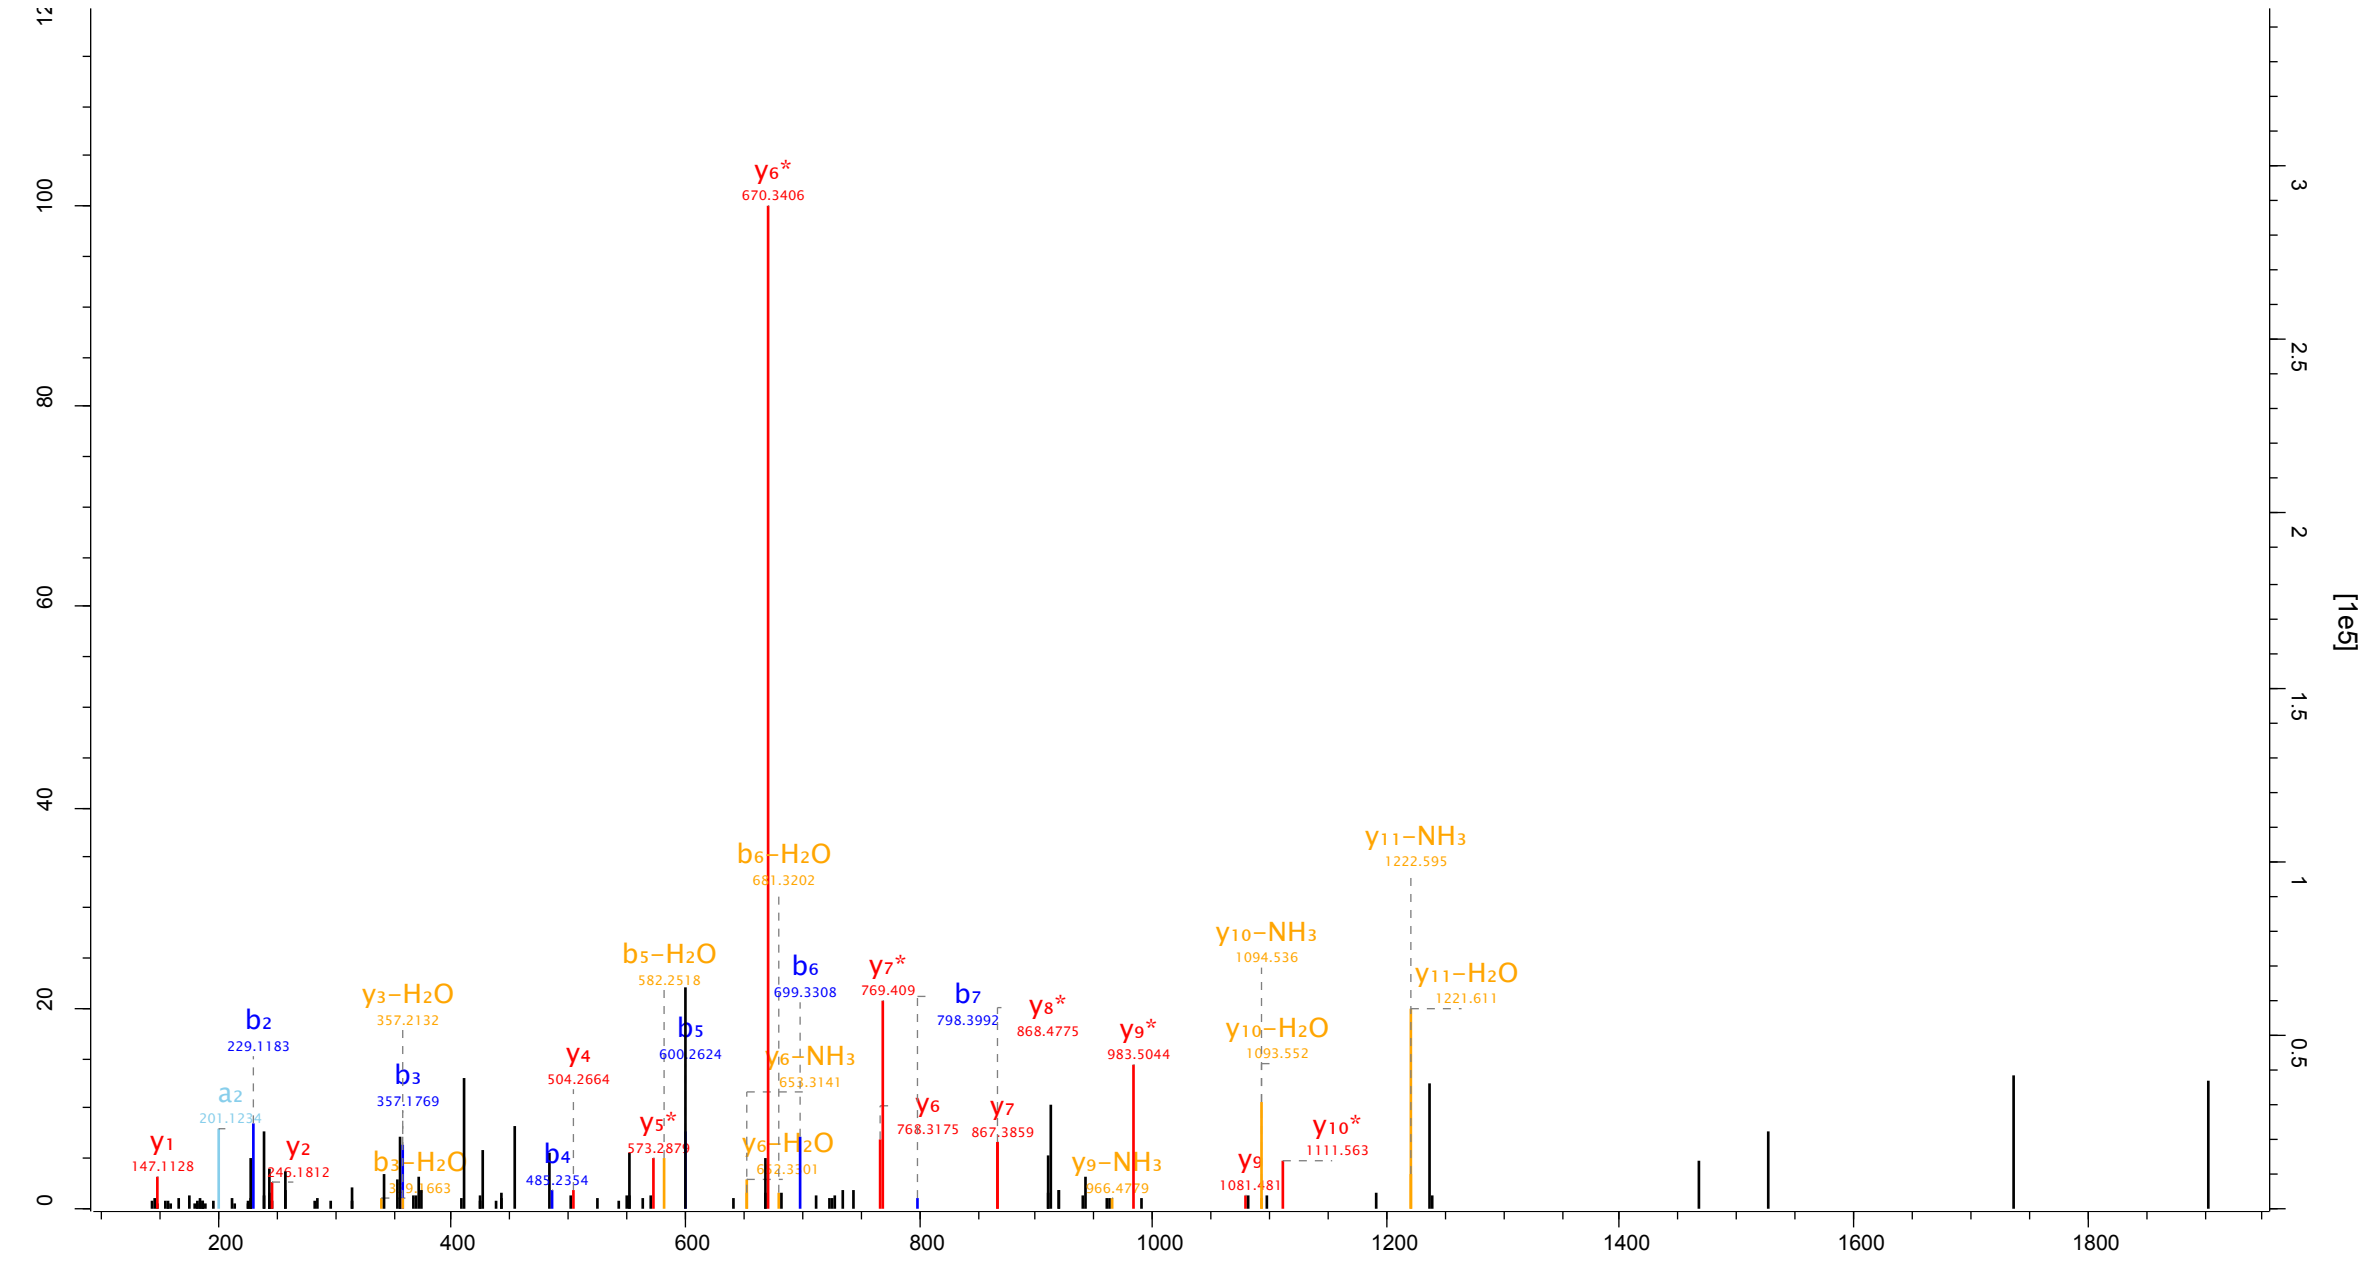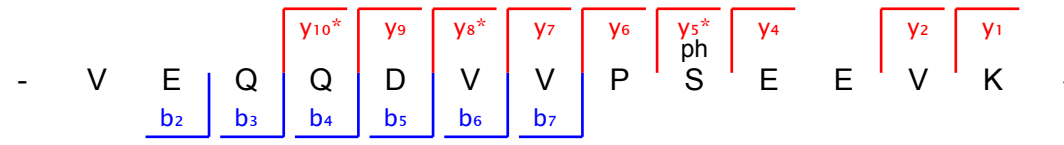

TraesCS2B01G177000.1 - S464

Raw File E16939\_2p3\_PSB-37\_IVSME\_tizhu\_34-3 Scan 20011 Method FTMS; HCD Score 115.05 m/z 704.8

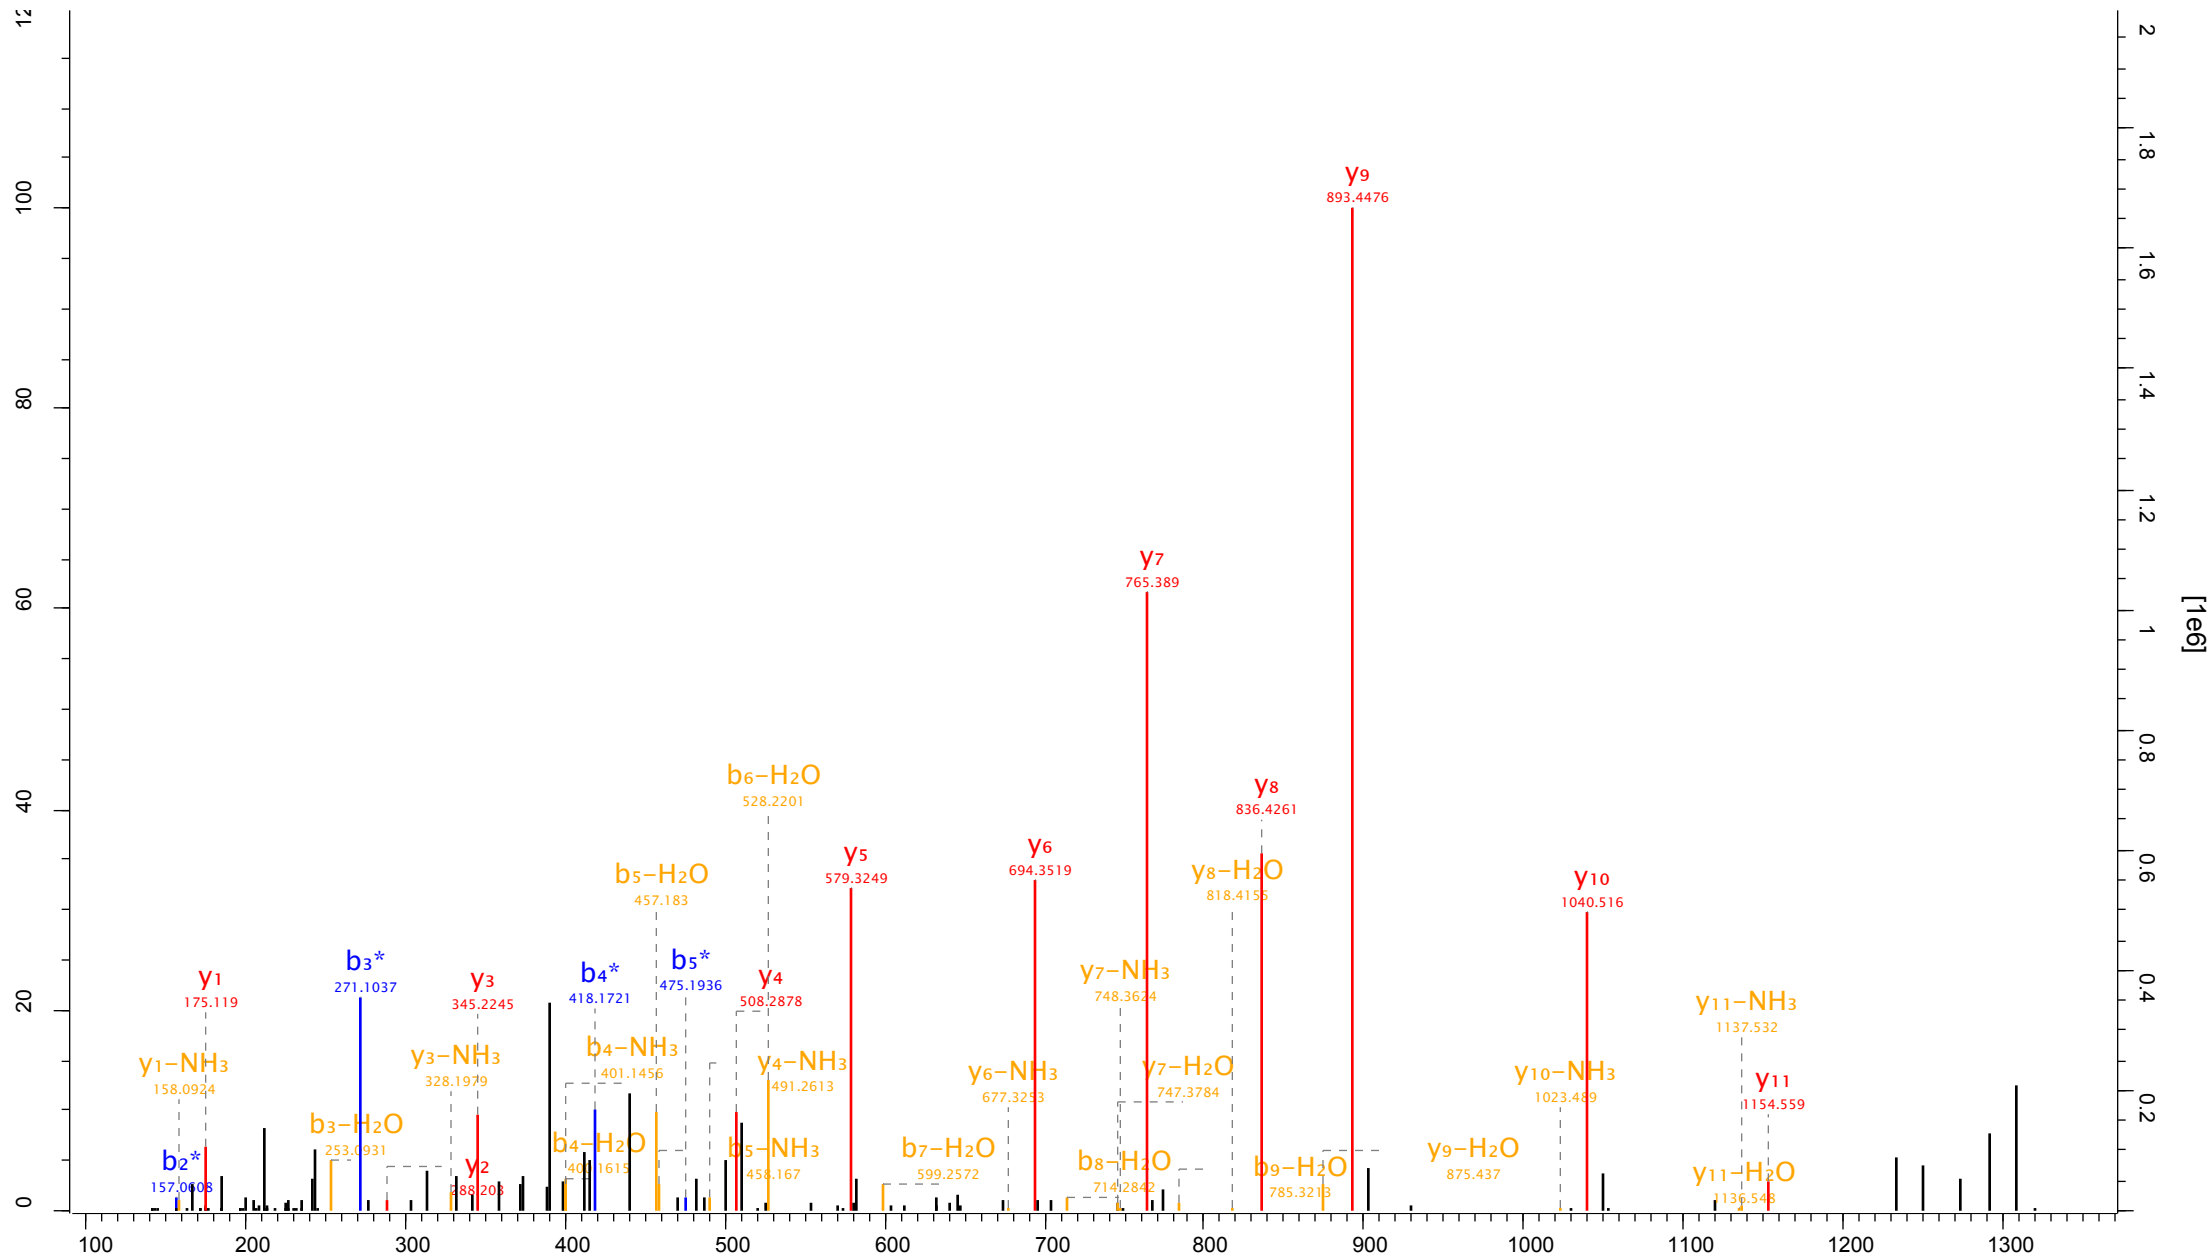

ph  
S S S N F G A A D A Y G I R -  
b2\* b3\* b4\* b5\* y11 y10 y9 y8 y7 y6 y5 y4 y3 y2 y1

TraesCS6A01G308600.1 - S268&269



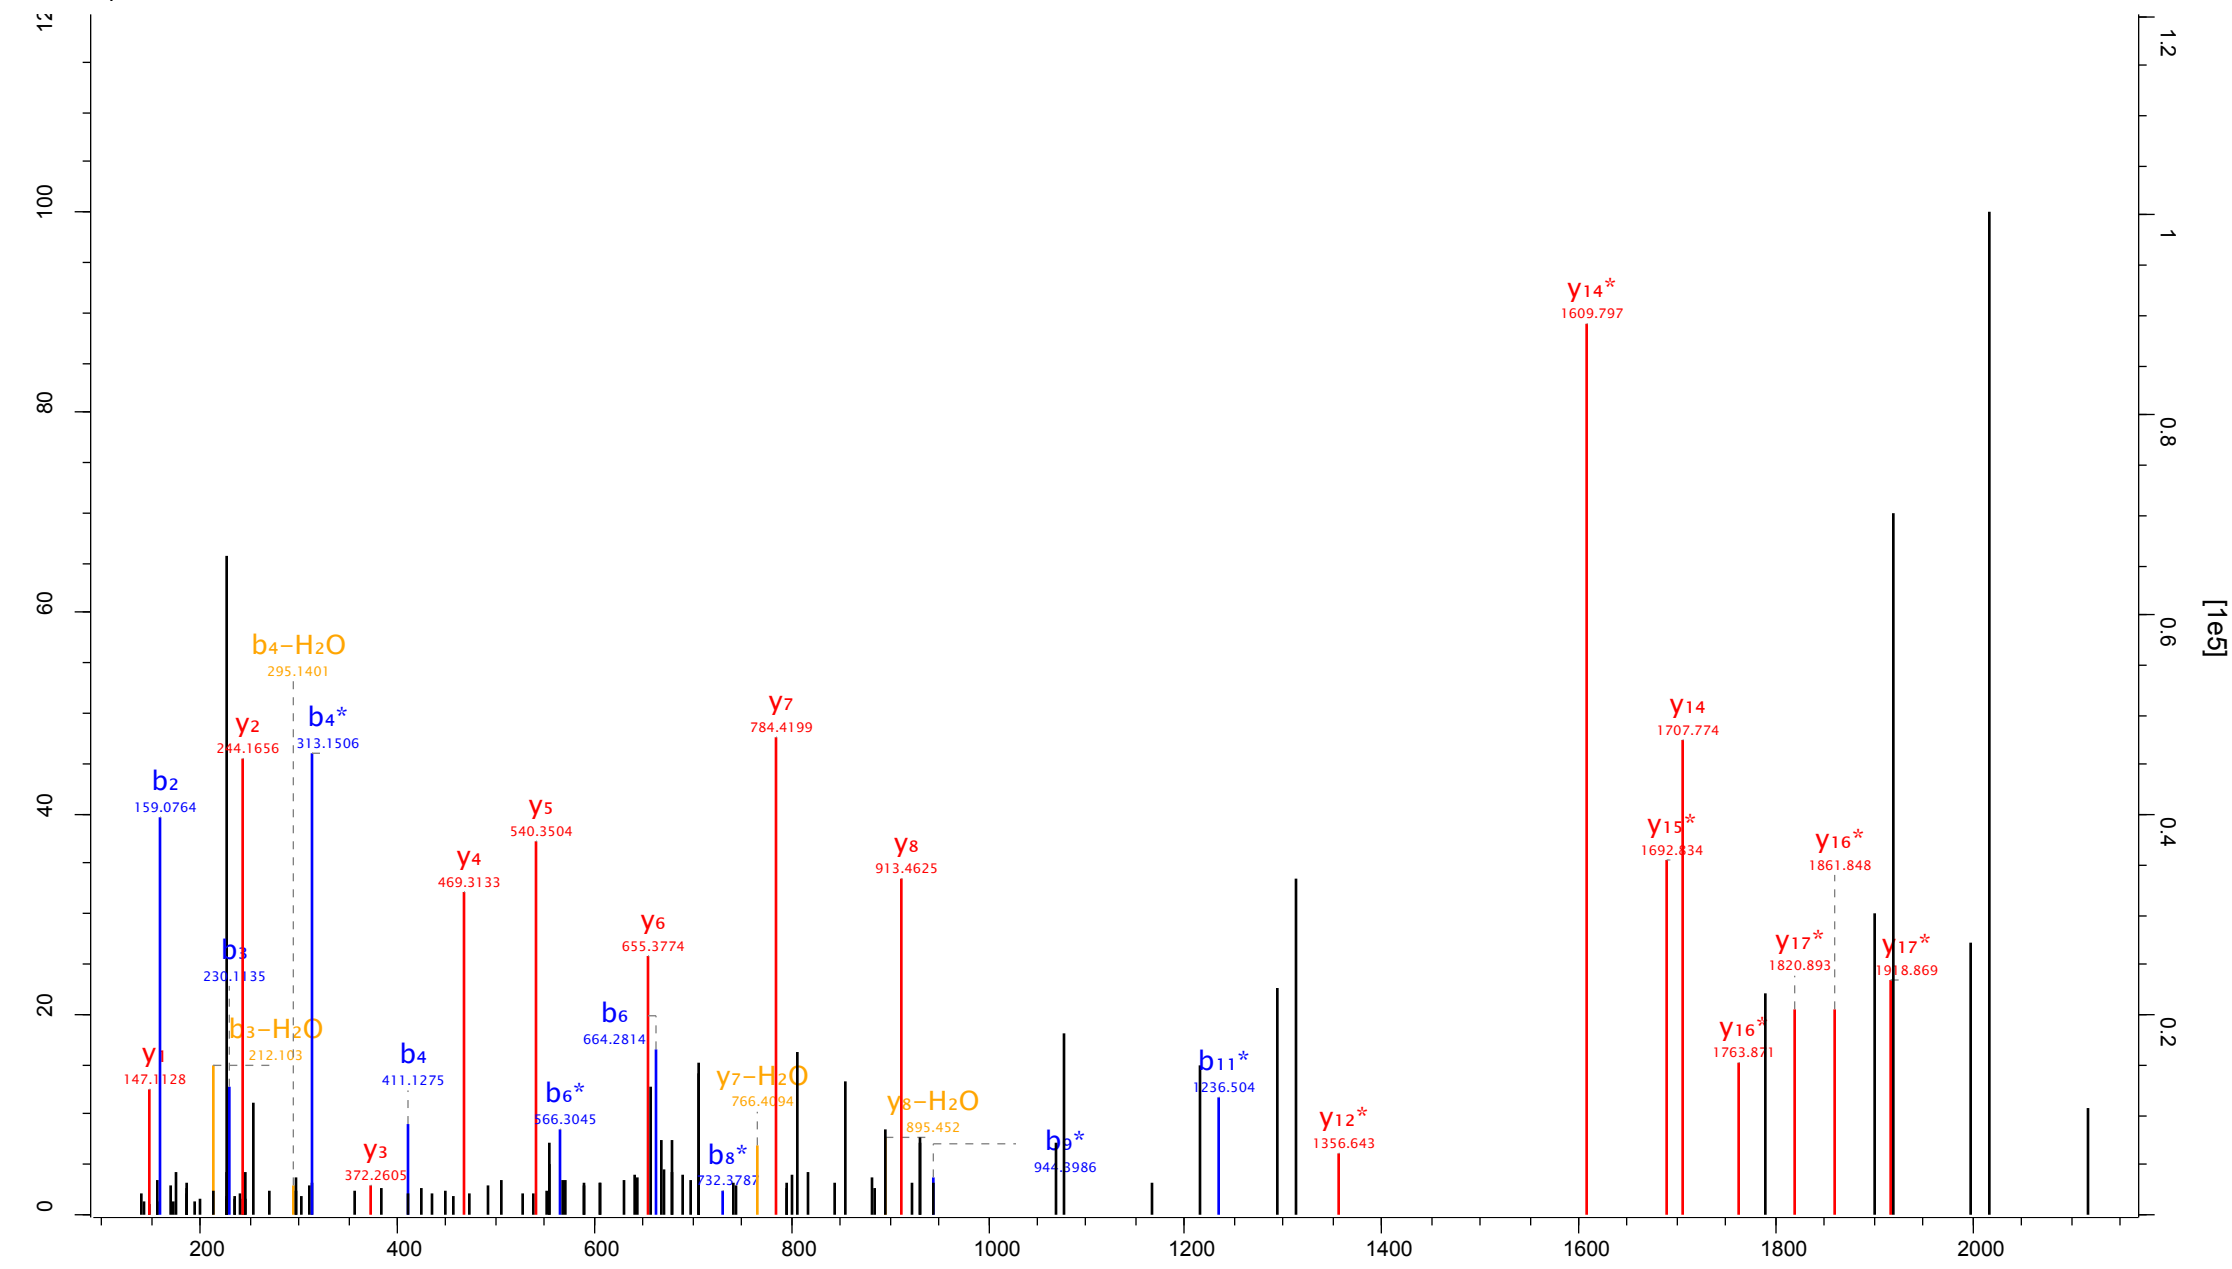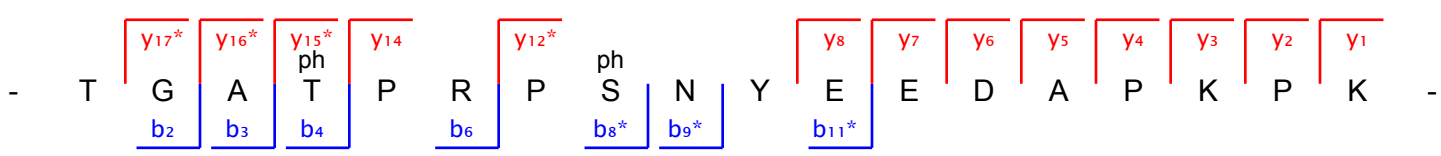

TraesCS6A01G308600.1 - T284

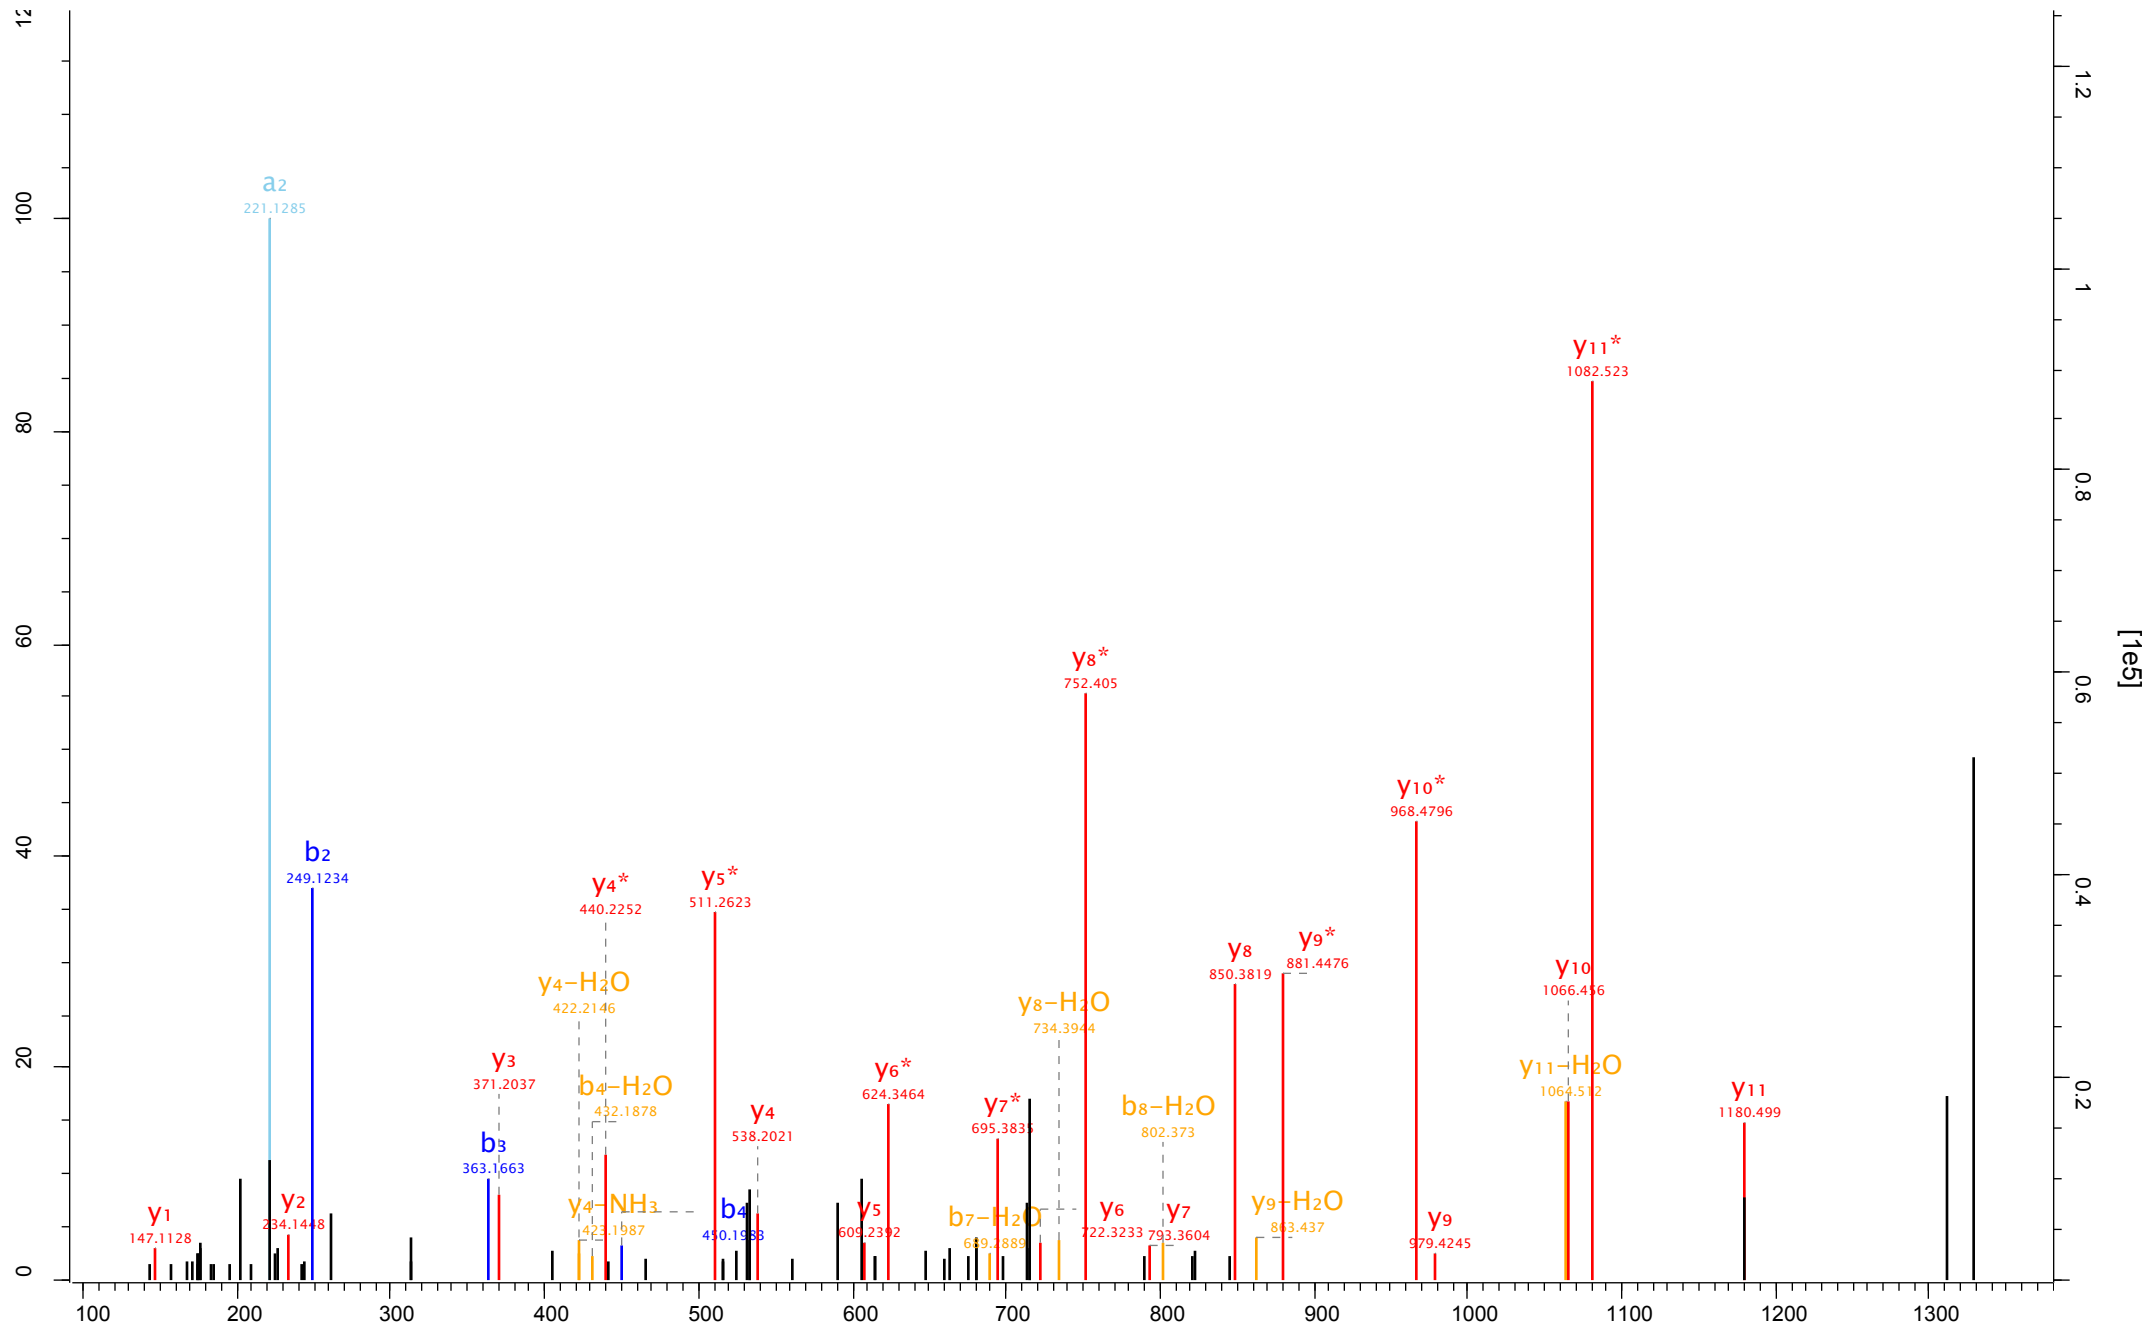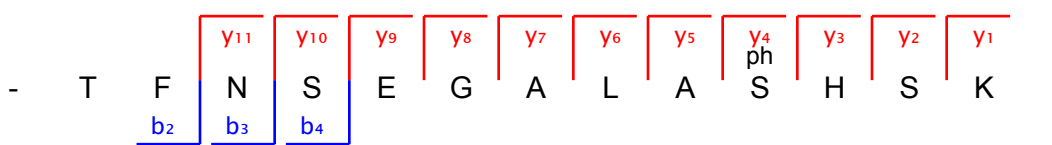

TraesCS1A01G445700.3 - S297

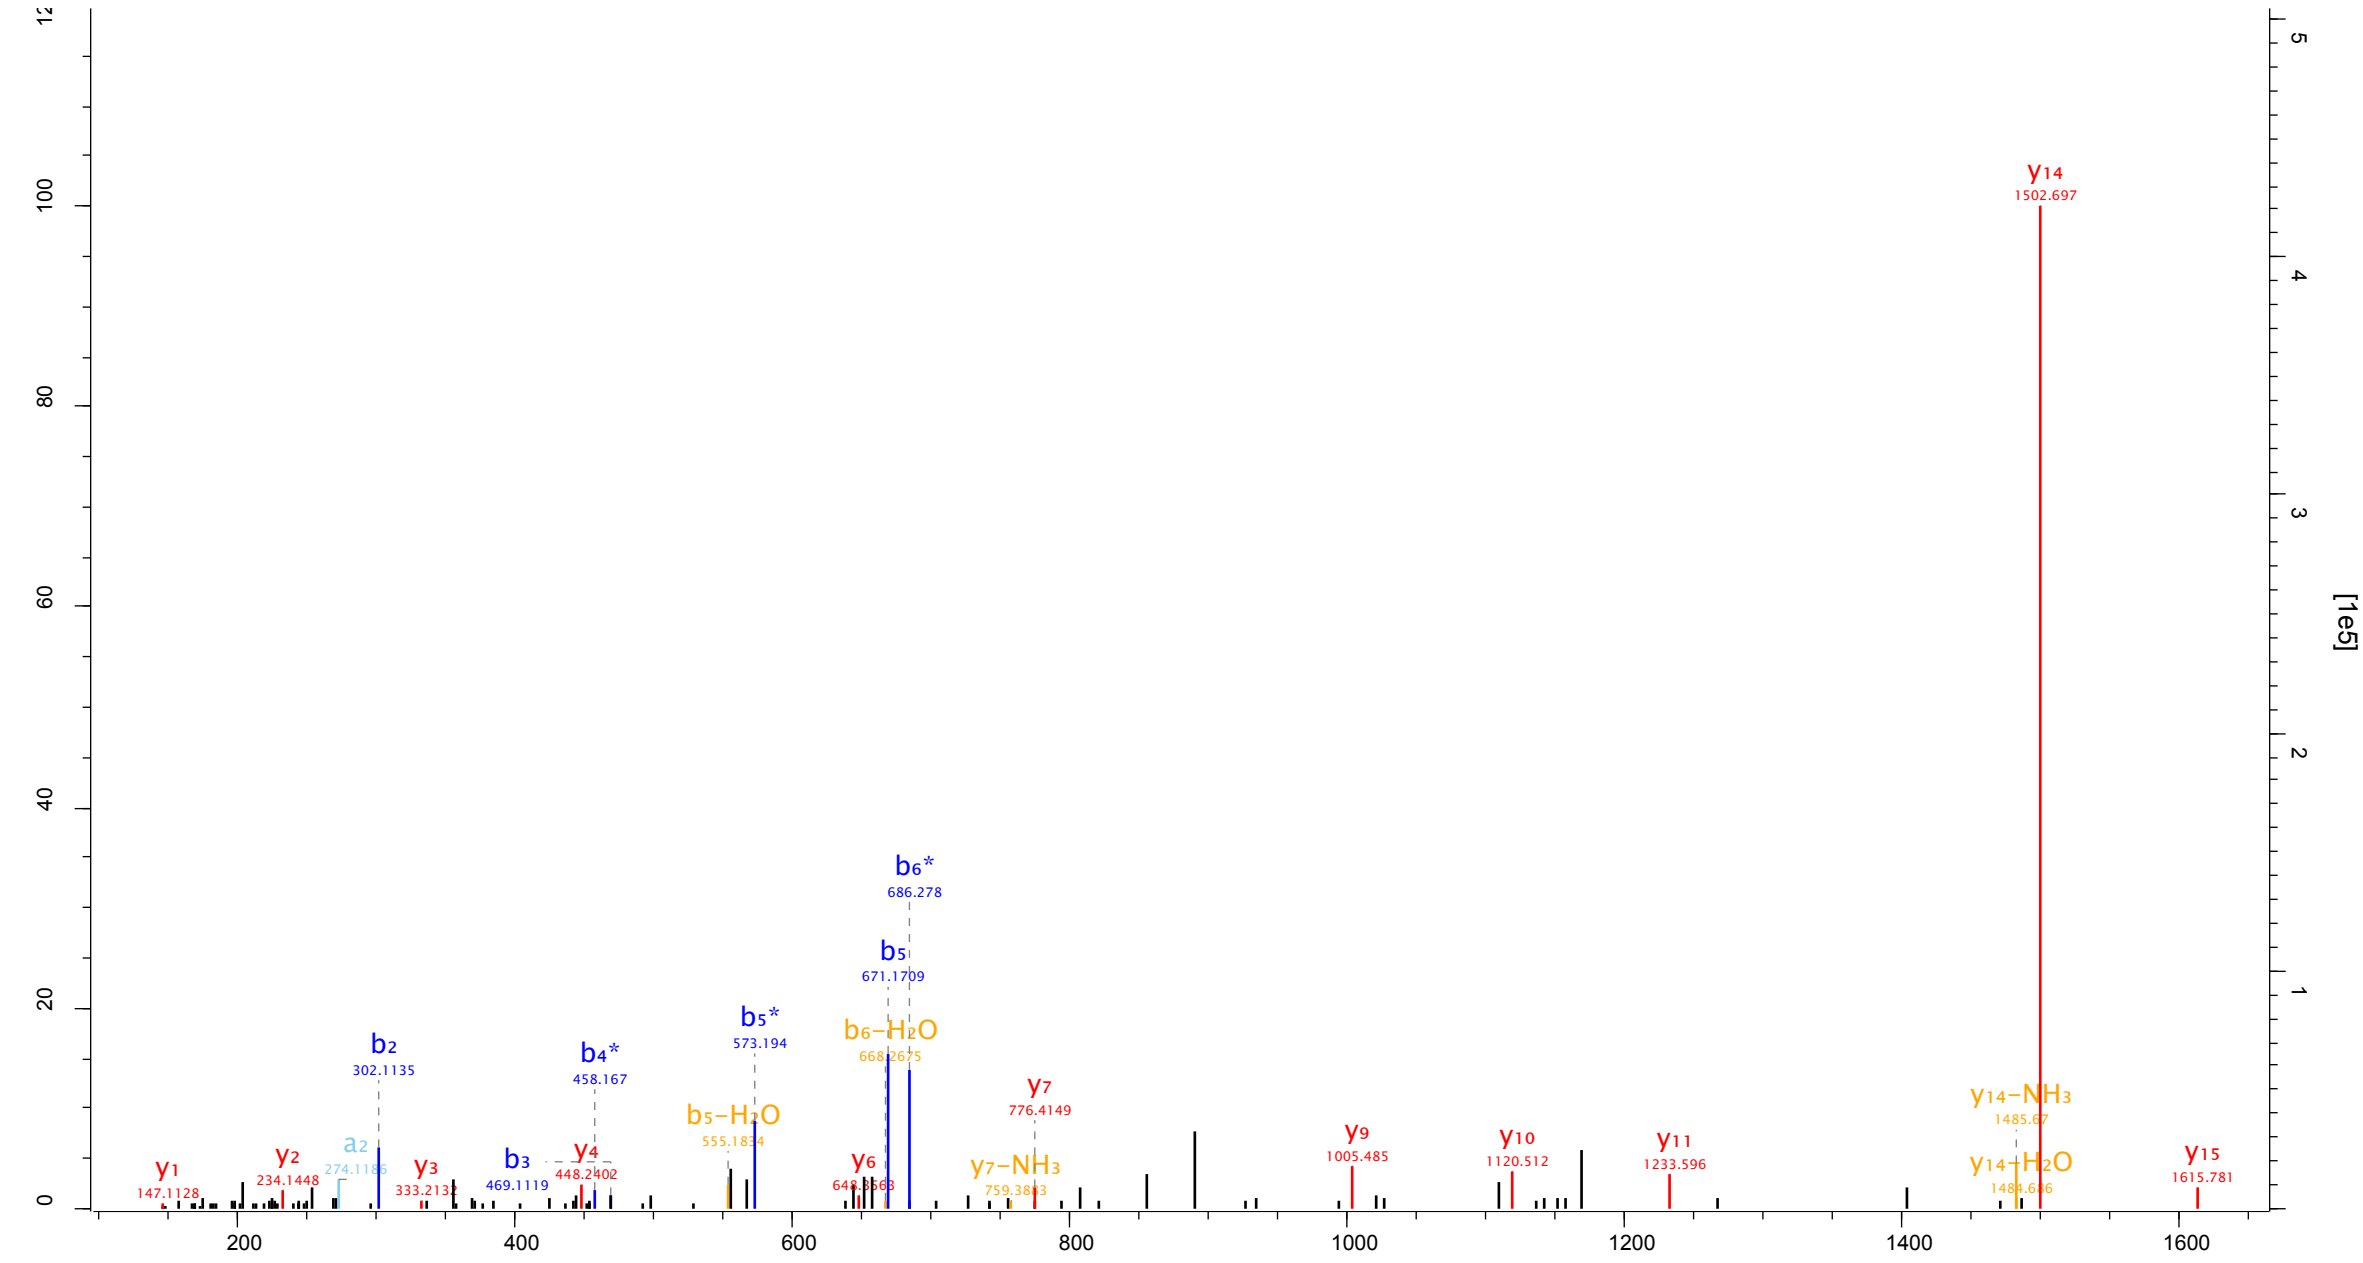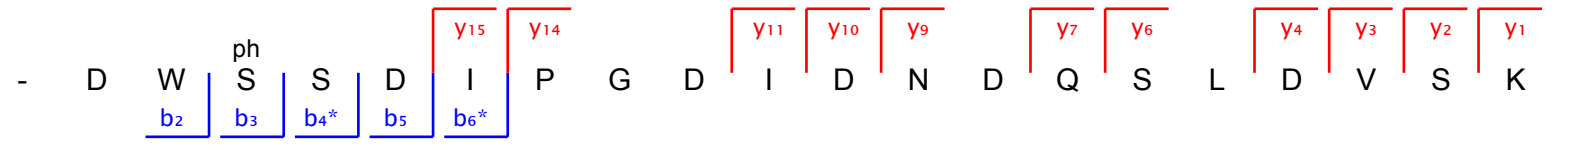

TraesCS2A01G262600.1 - S762

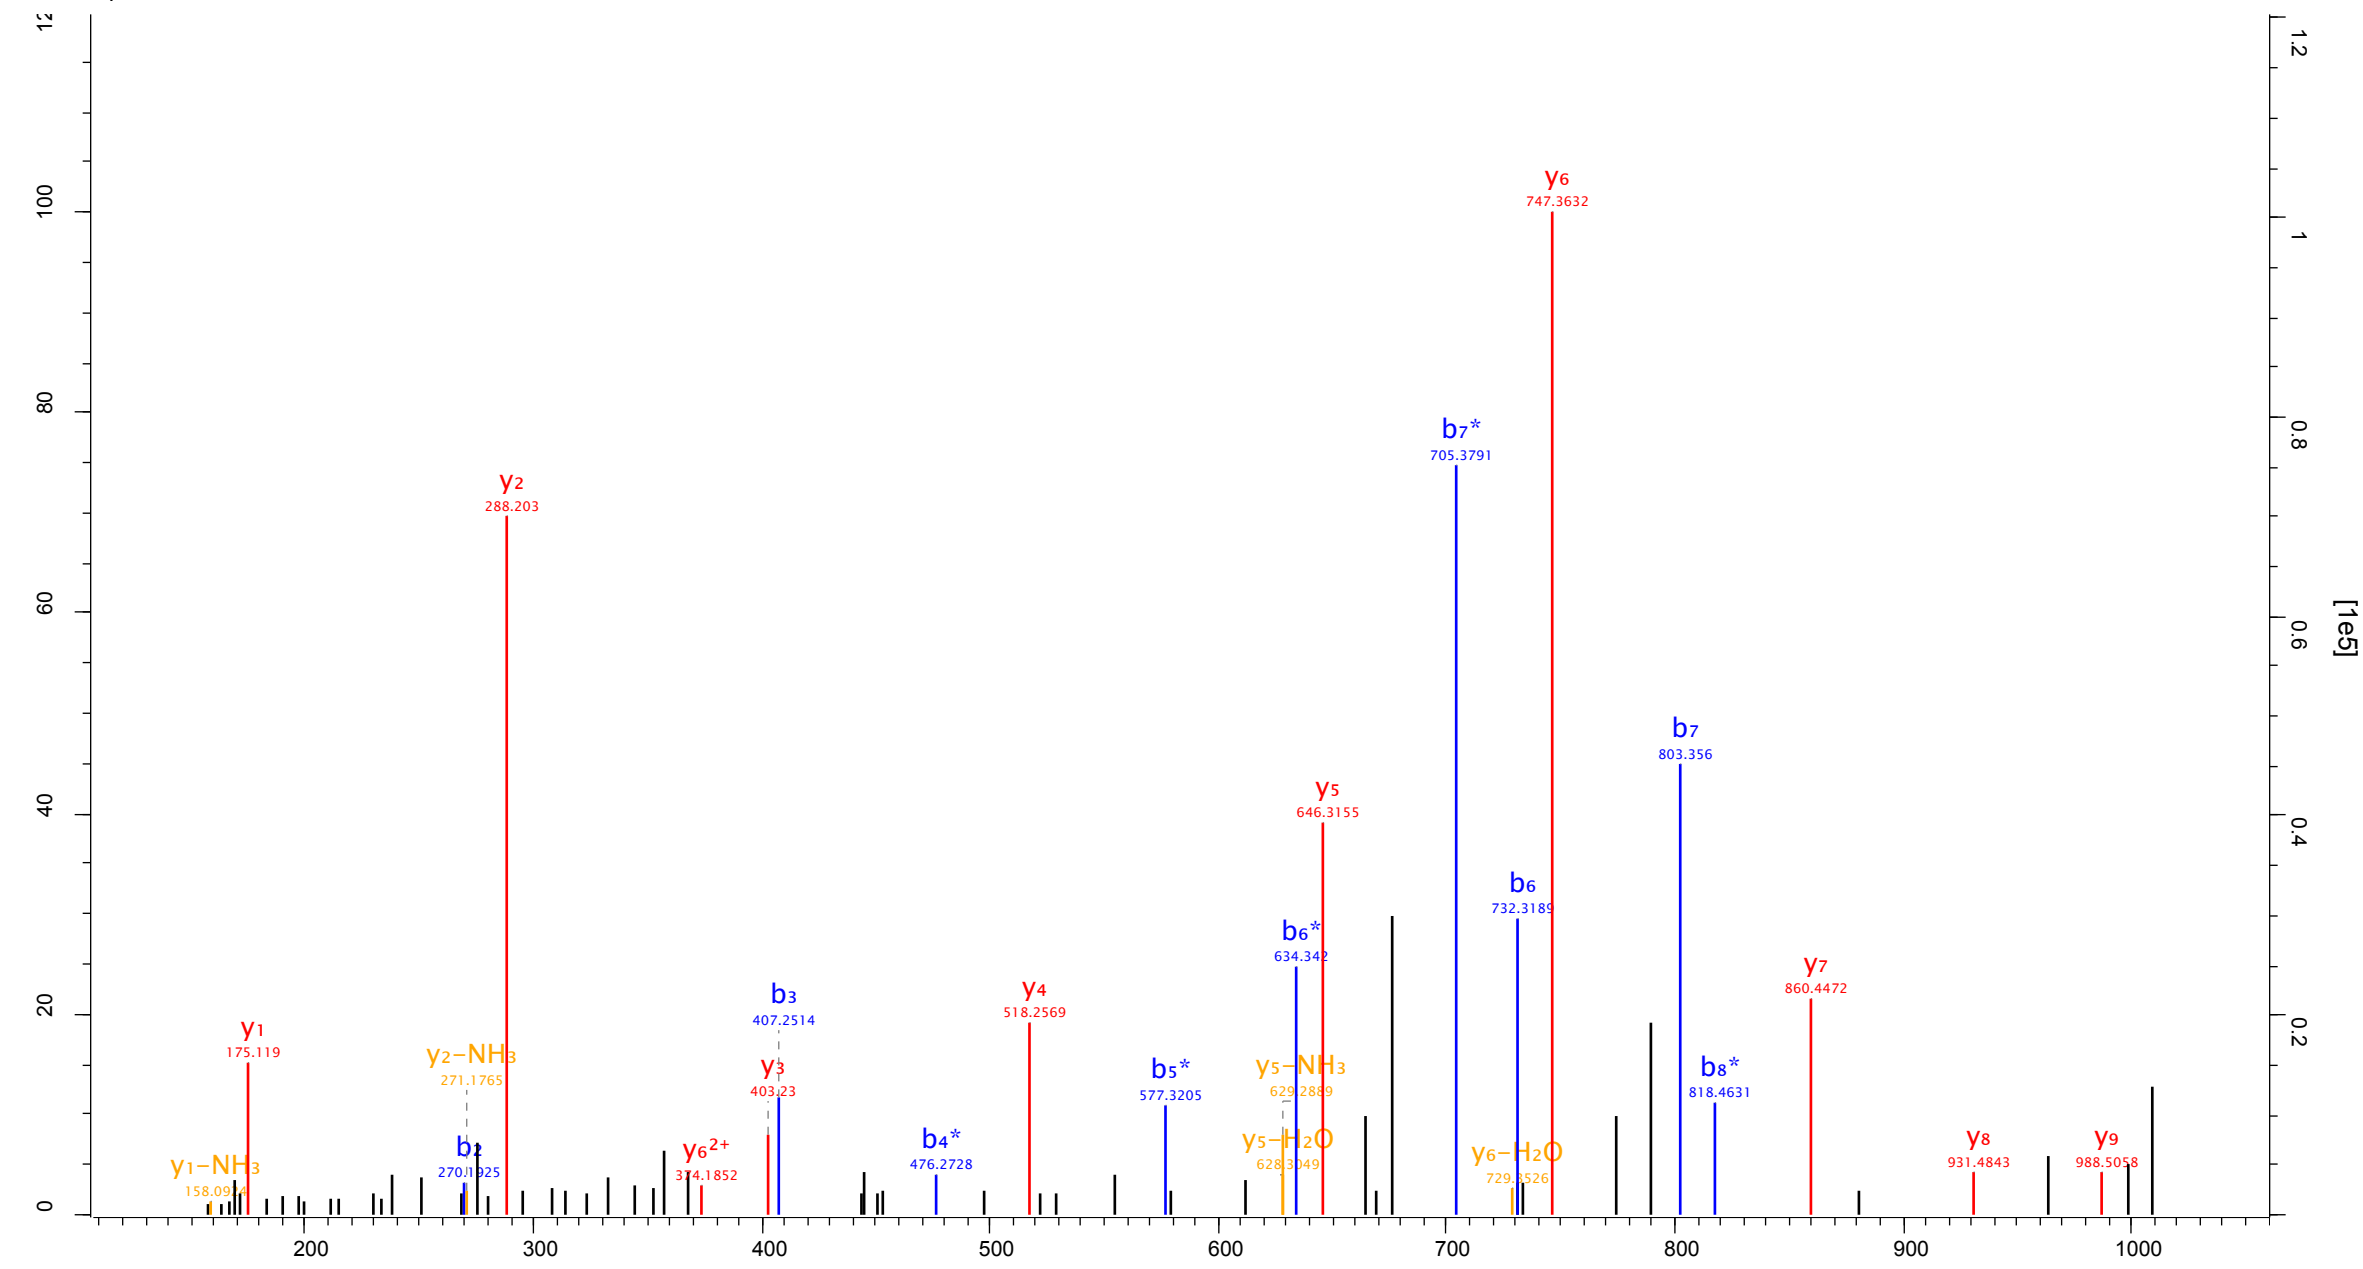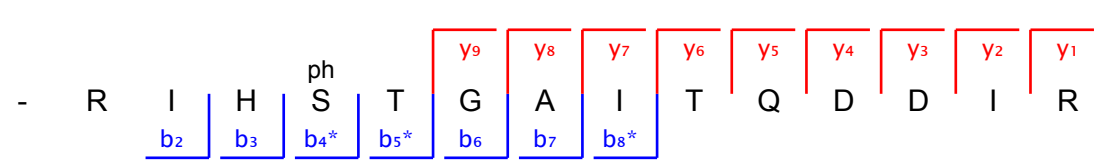

TraesCS4D01G266600.3 - S31

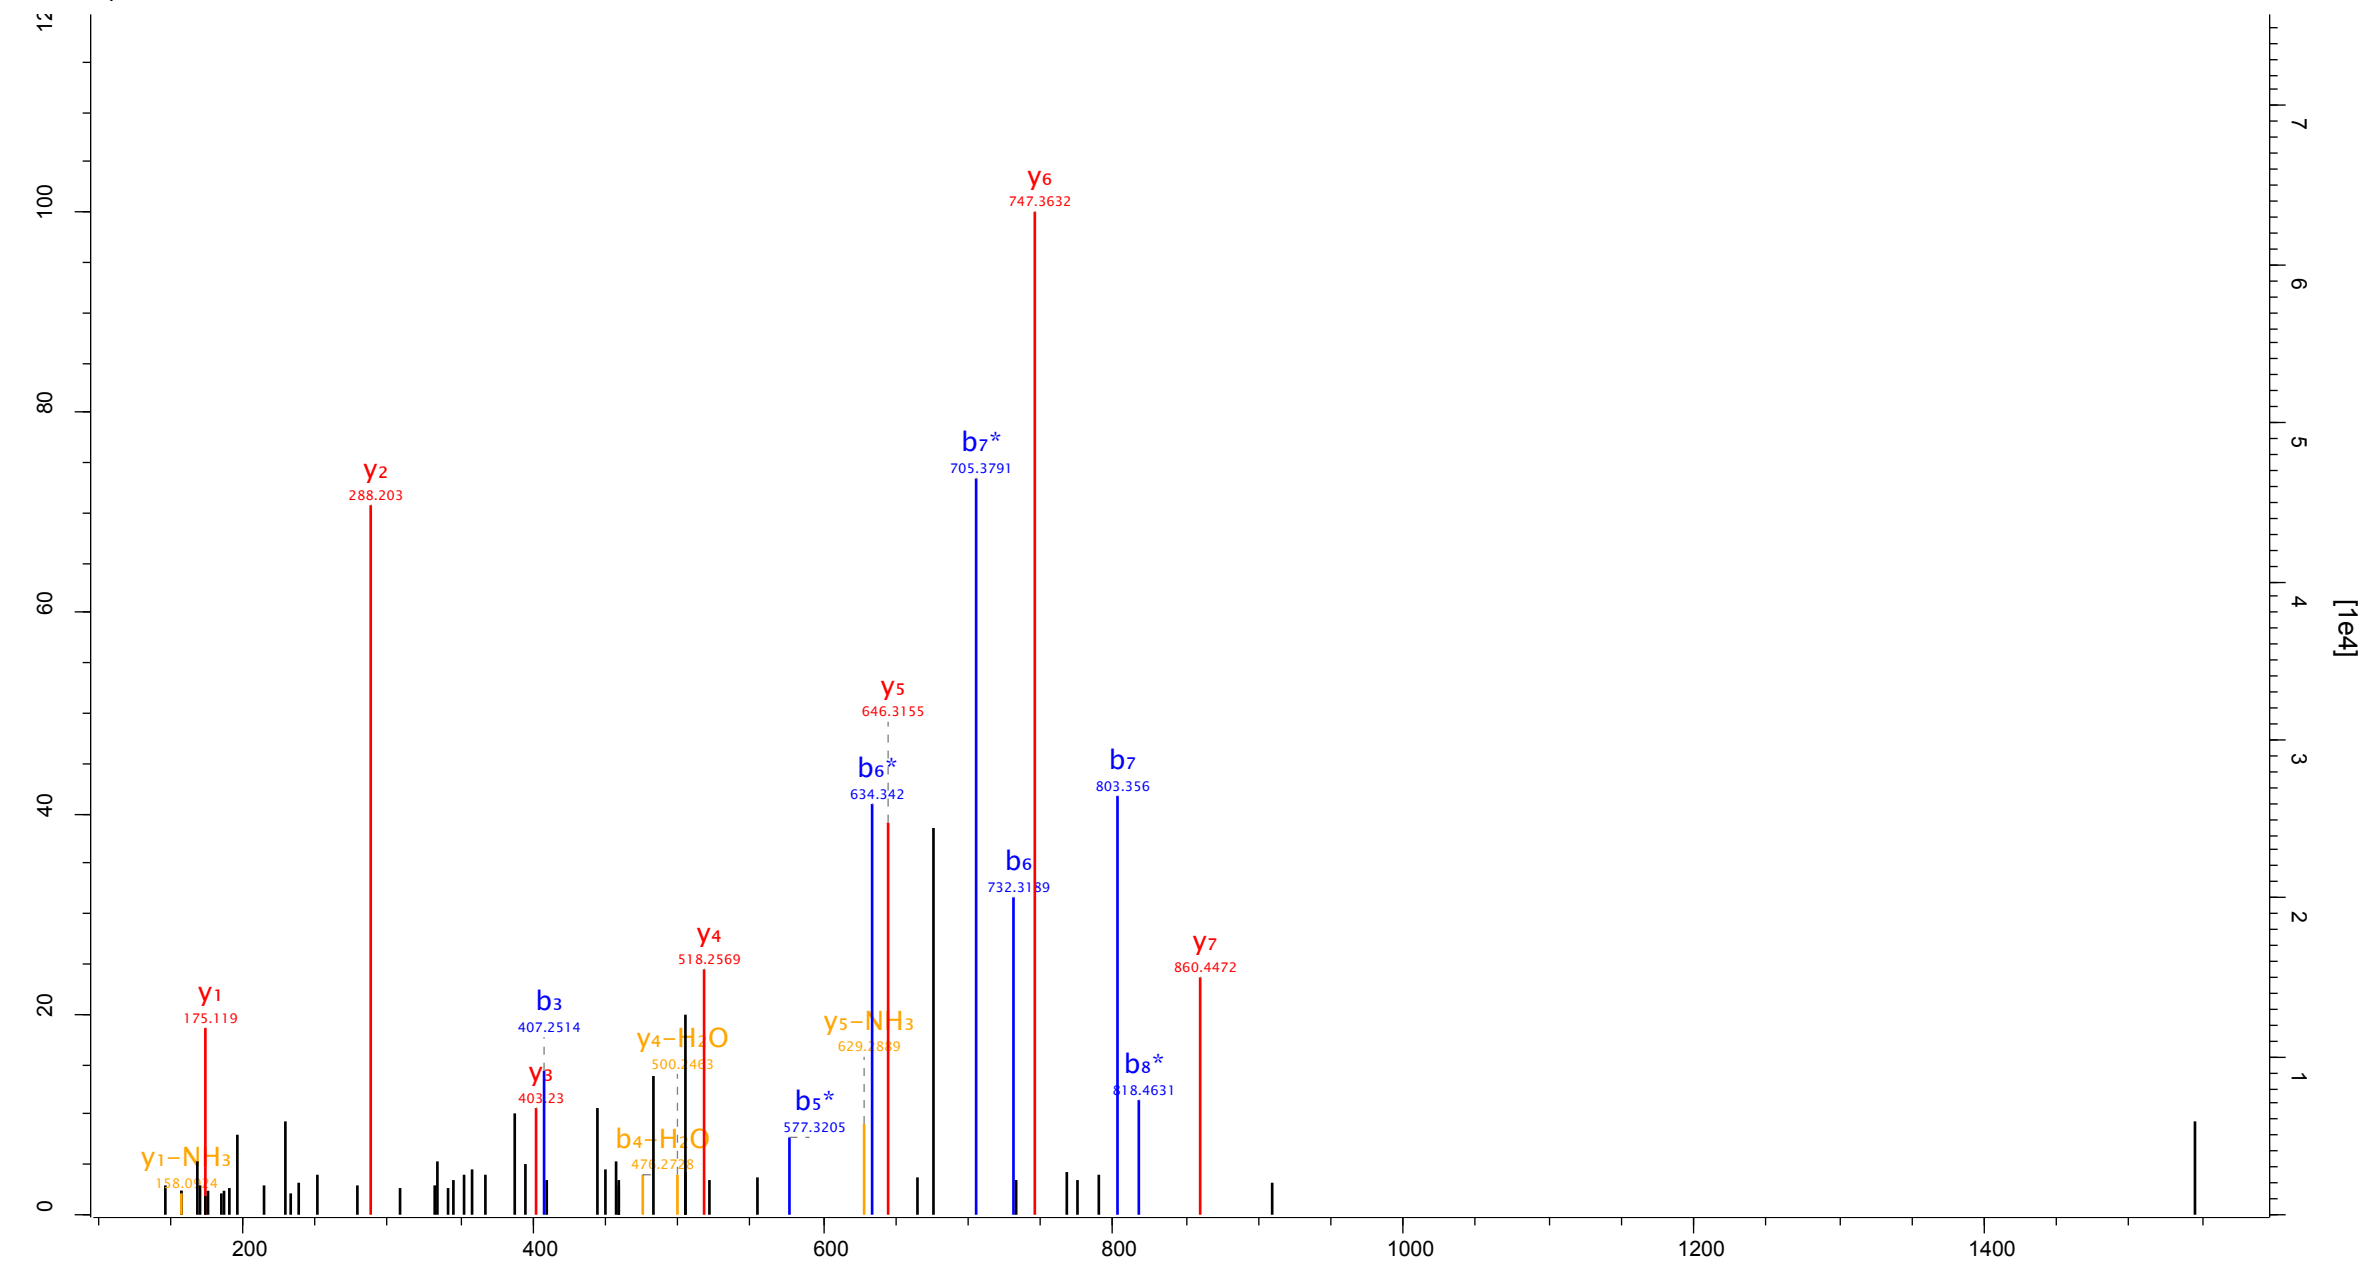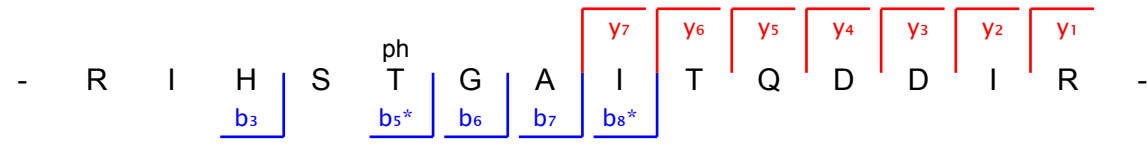

TraesCS4D01G266600.3 - T32

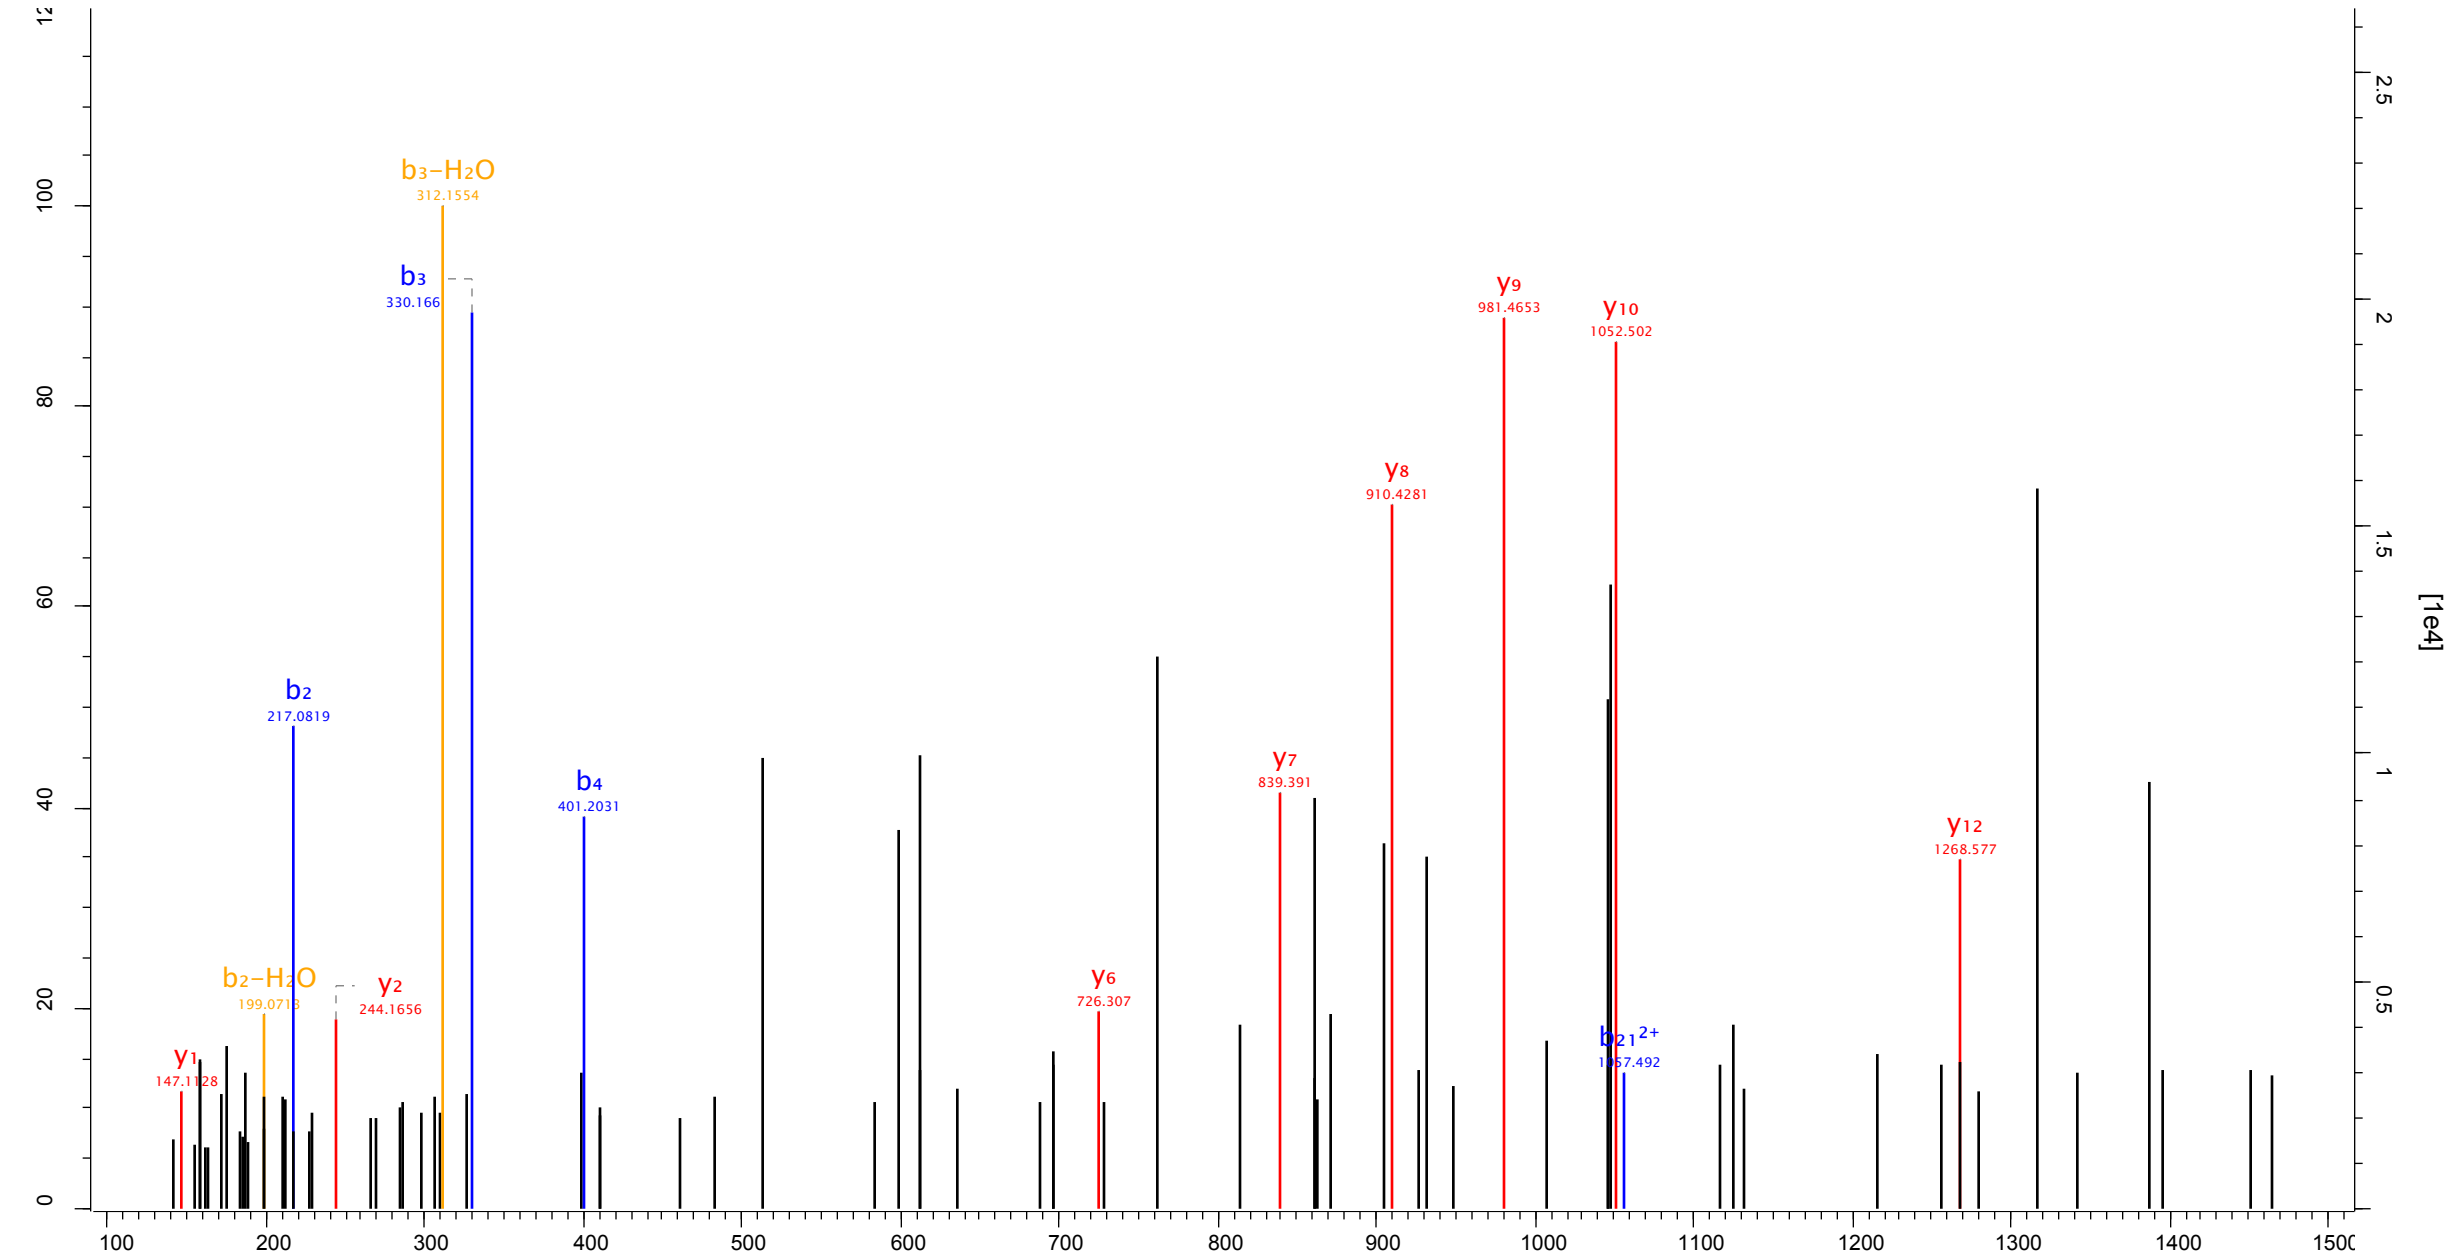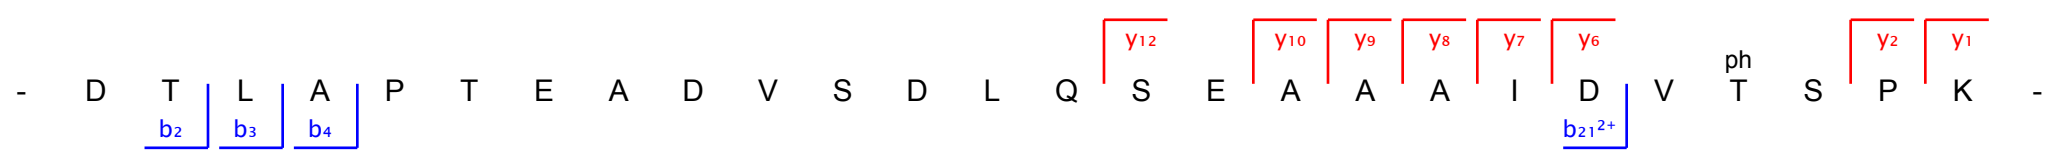

TraesCS7D01G206700.3 - T2492

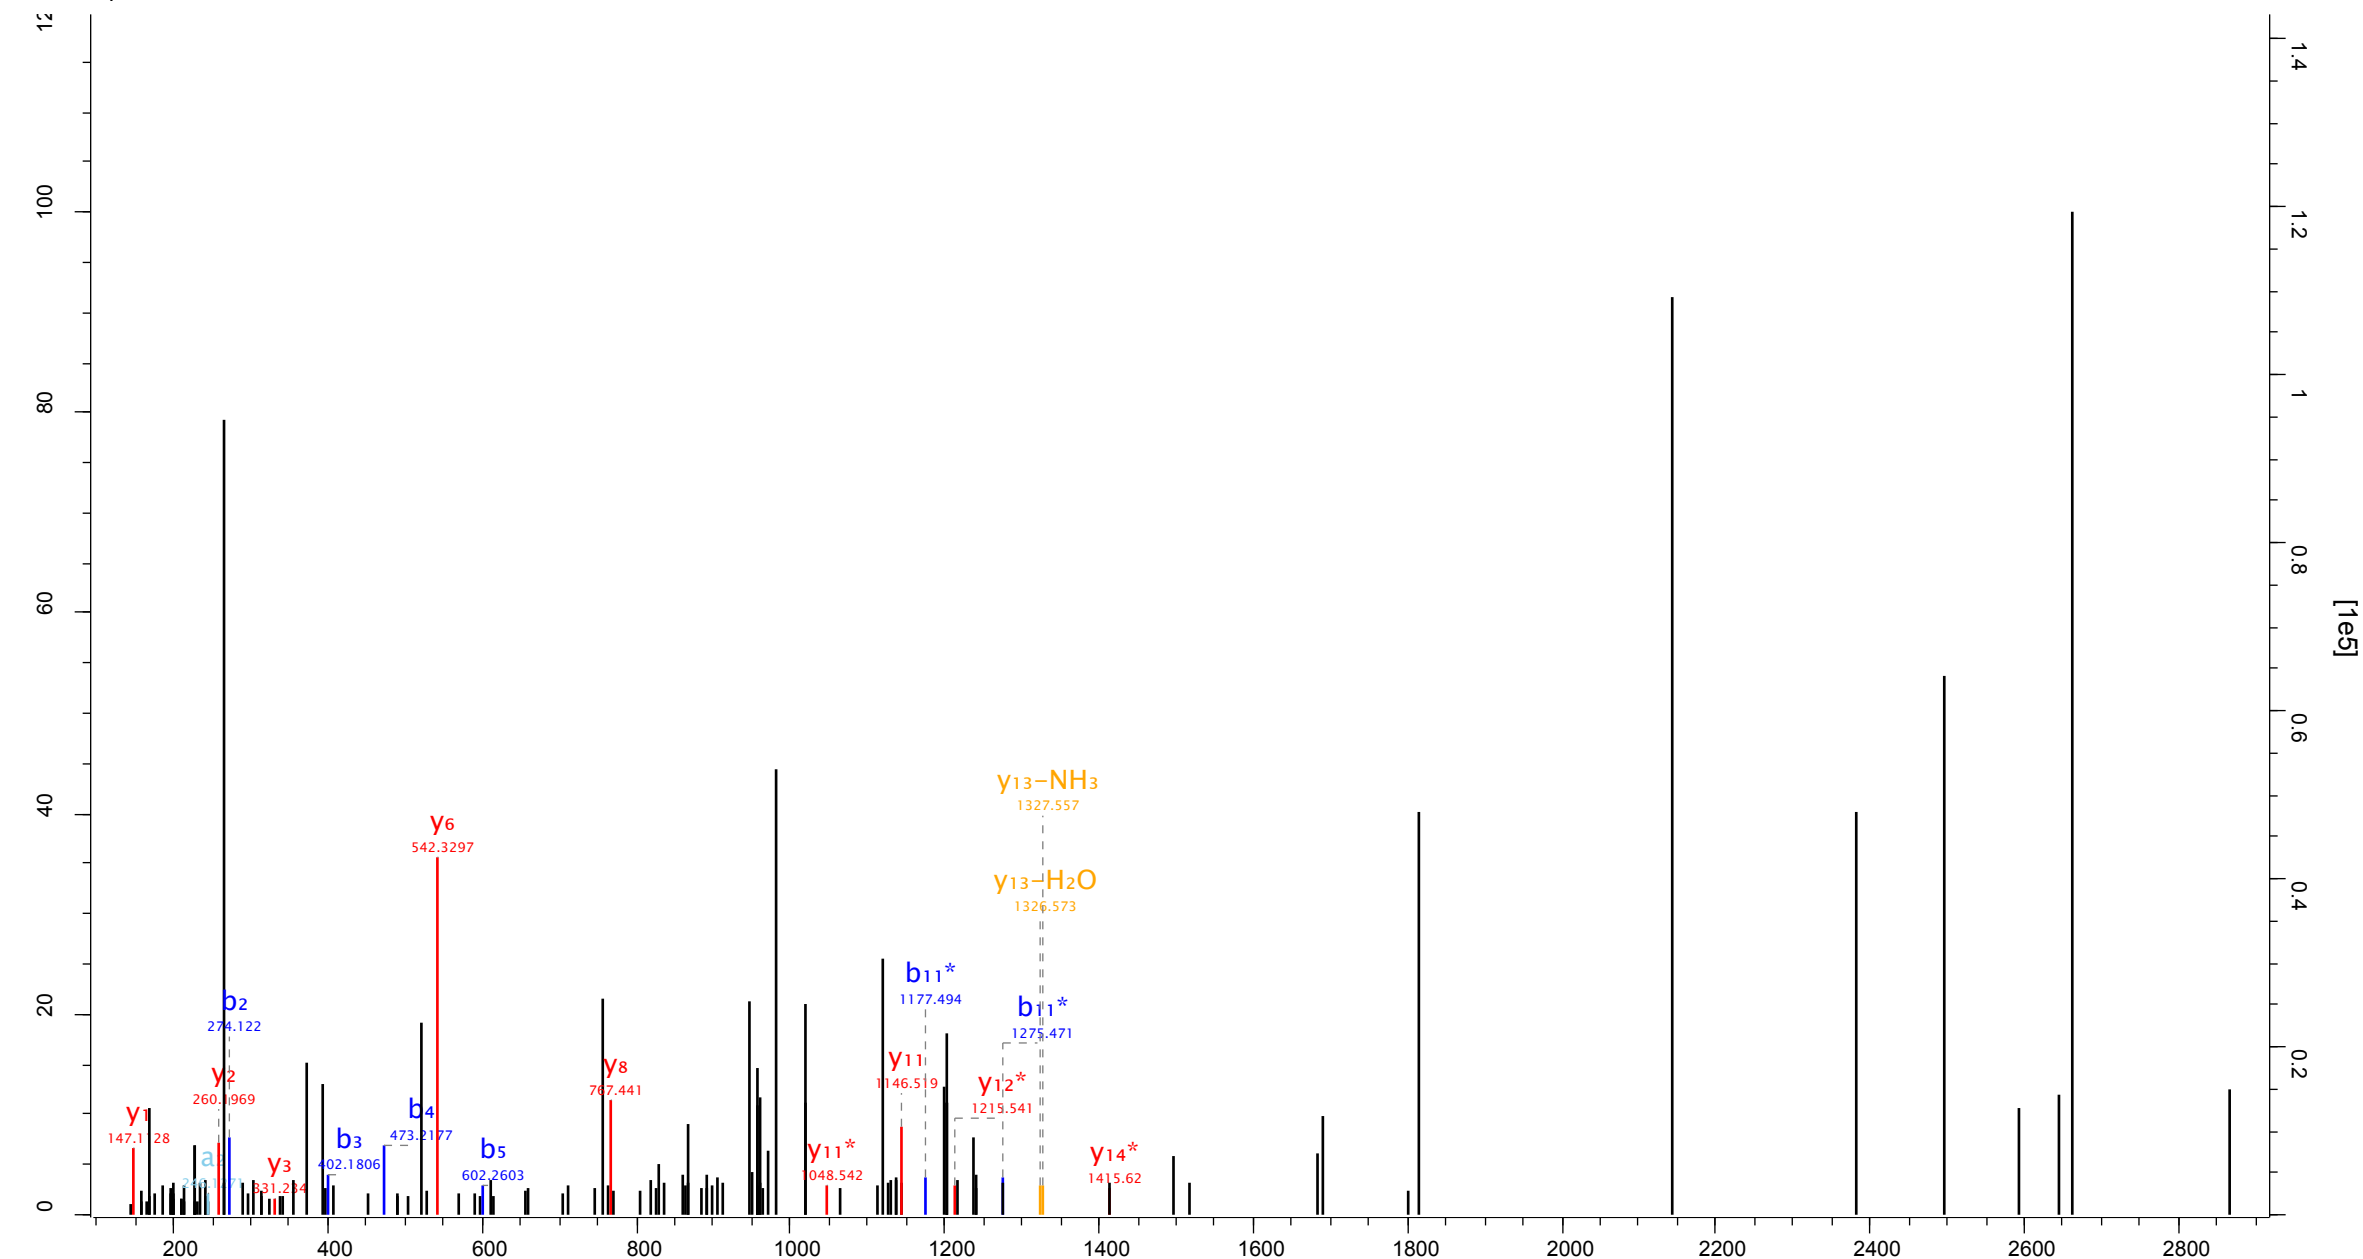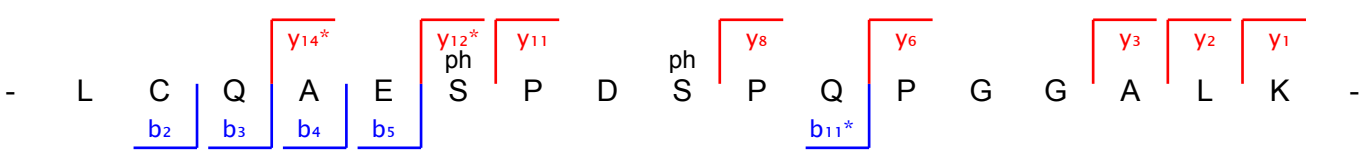

TraesCS7B01G110600.1 - S1668 and S1671

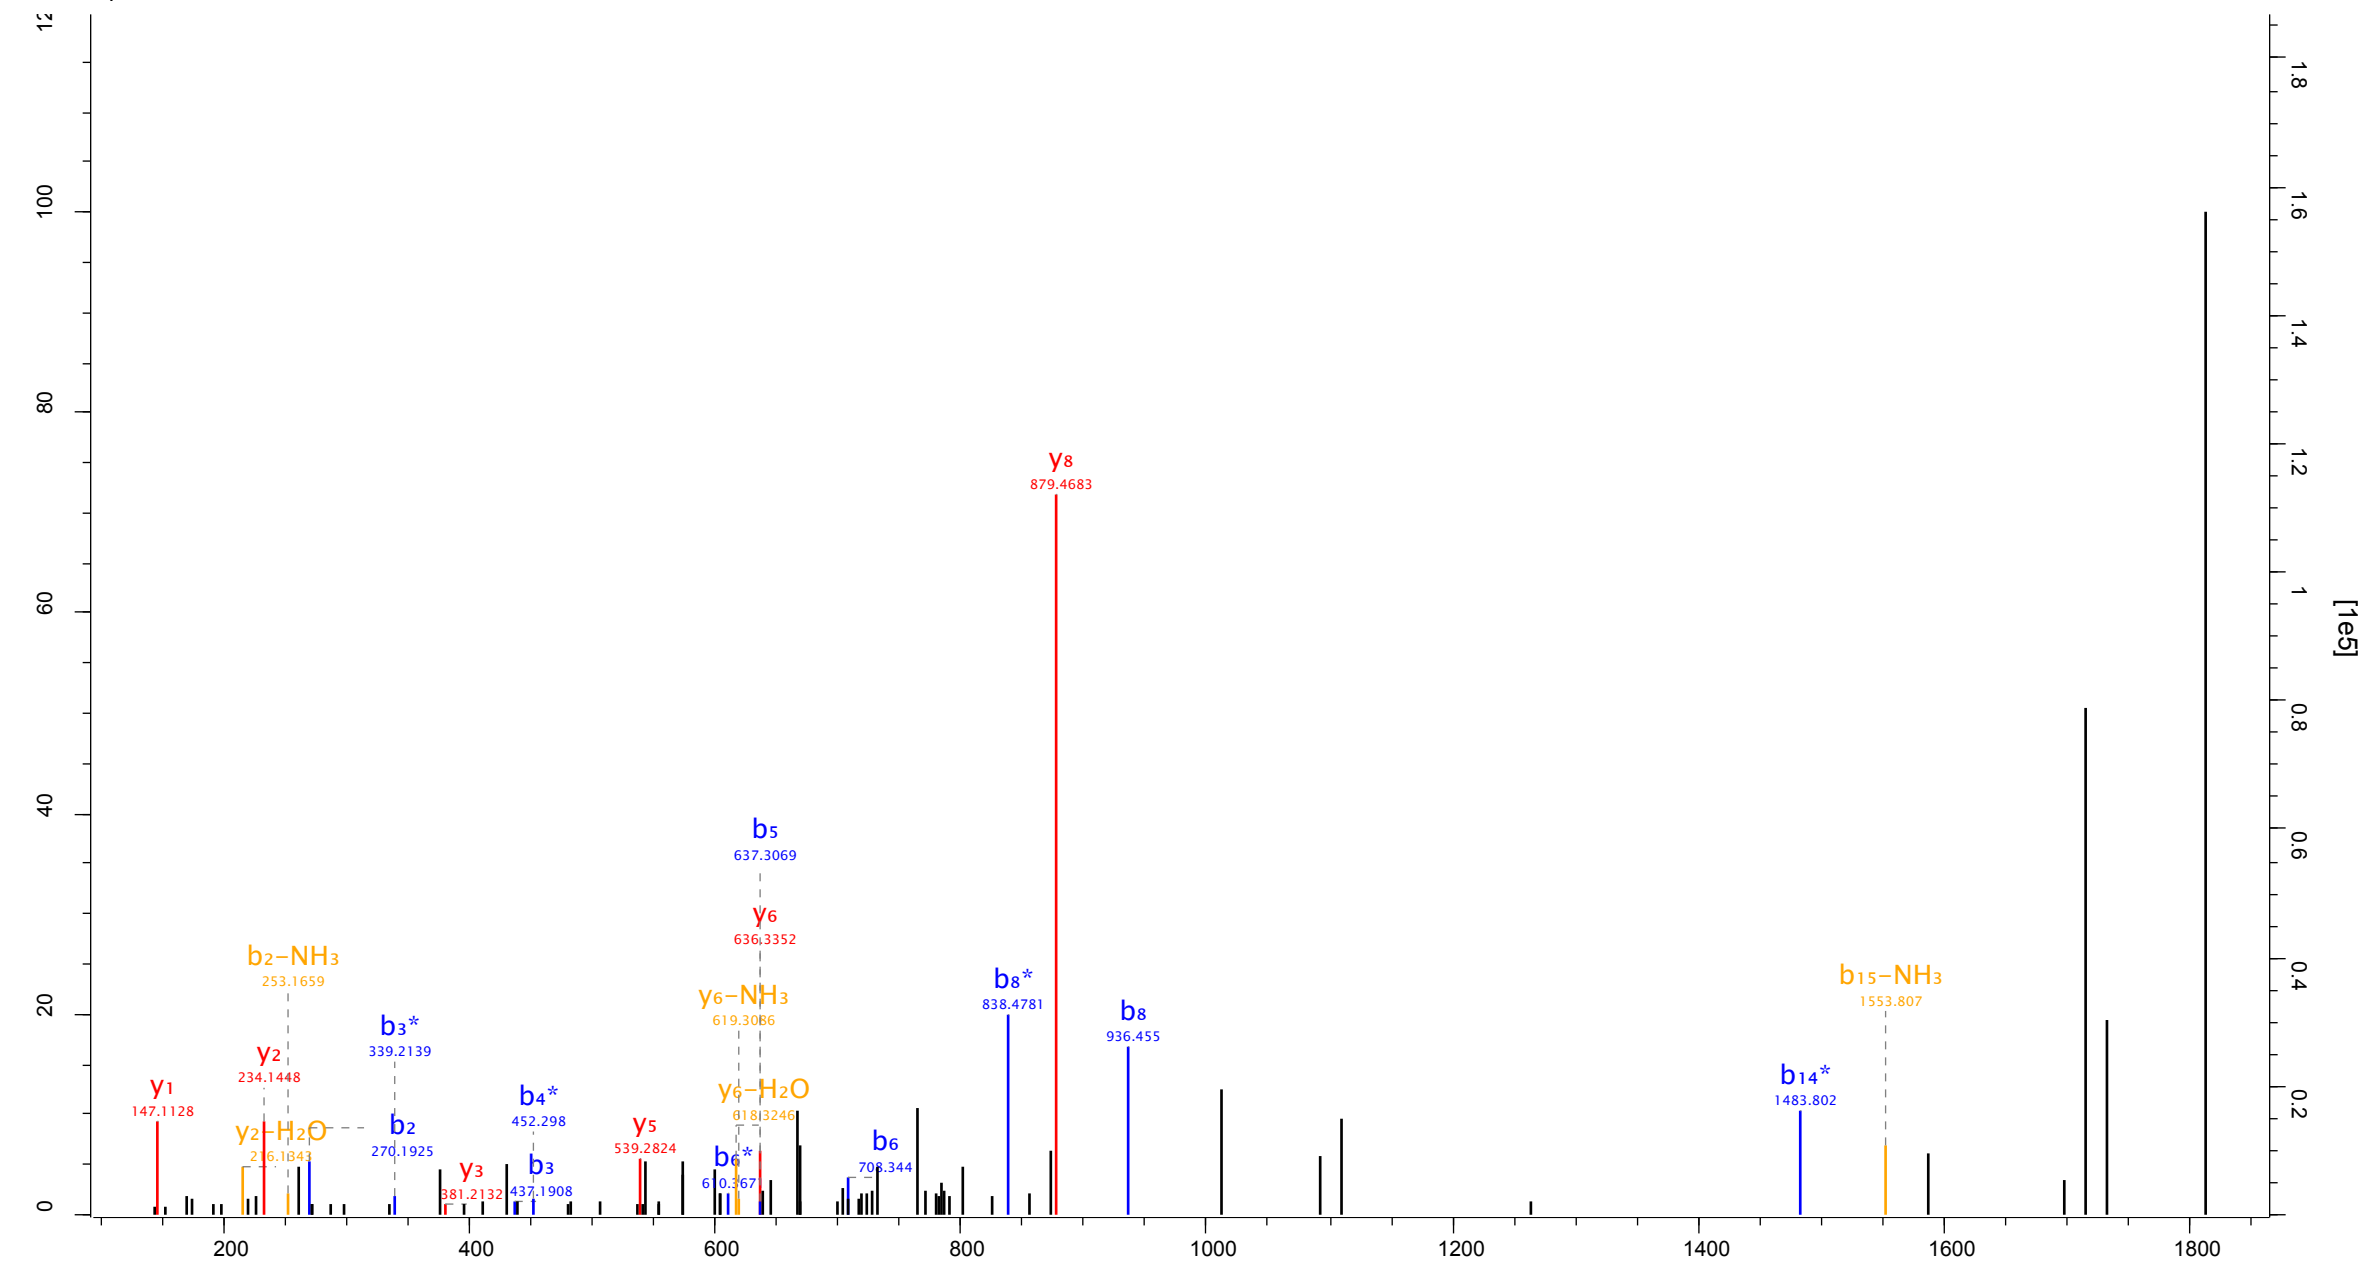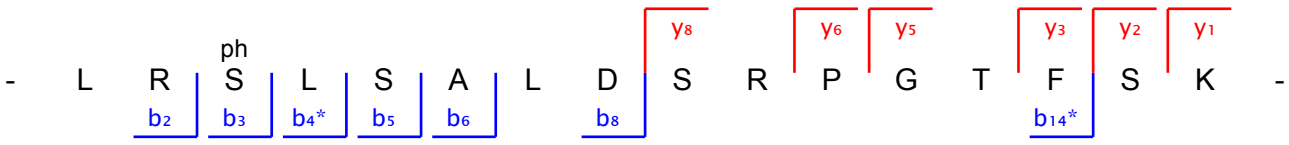

TraesCS6B01G048200.2 - S1728



Raw File E16933\_2p3\_PSB-37\_IVSME\_tizhu\_21-3 Scan 13385 Method FTMS; HCD Score 95.98 m/z 676.33

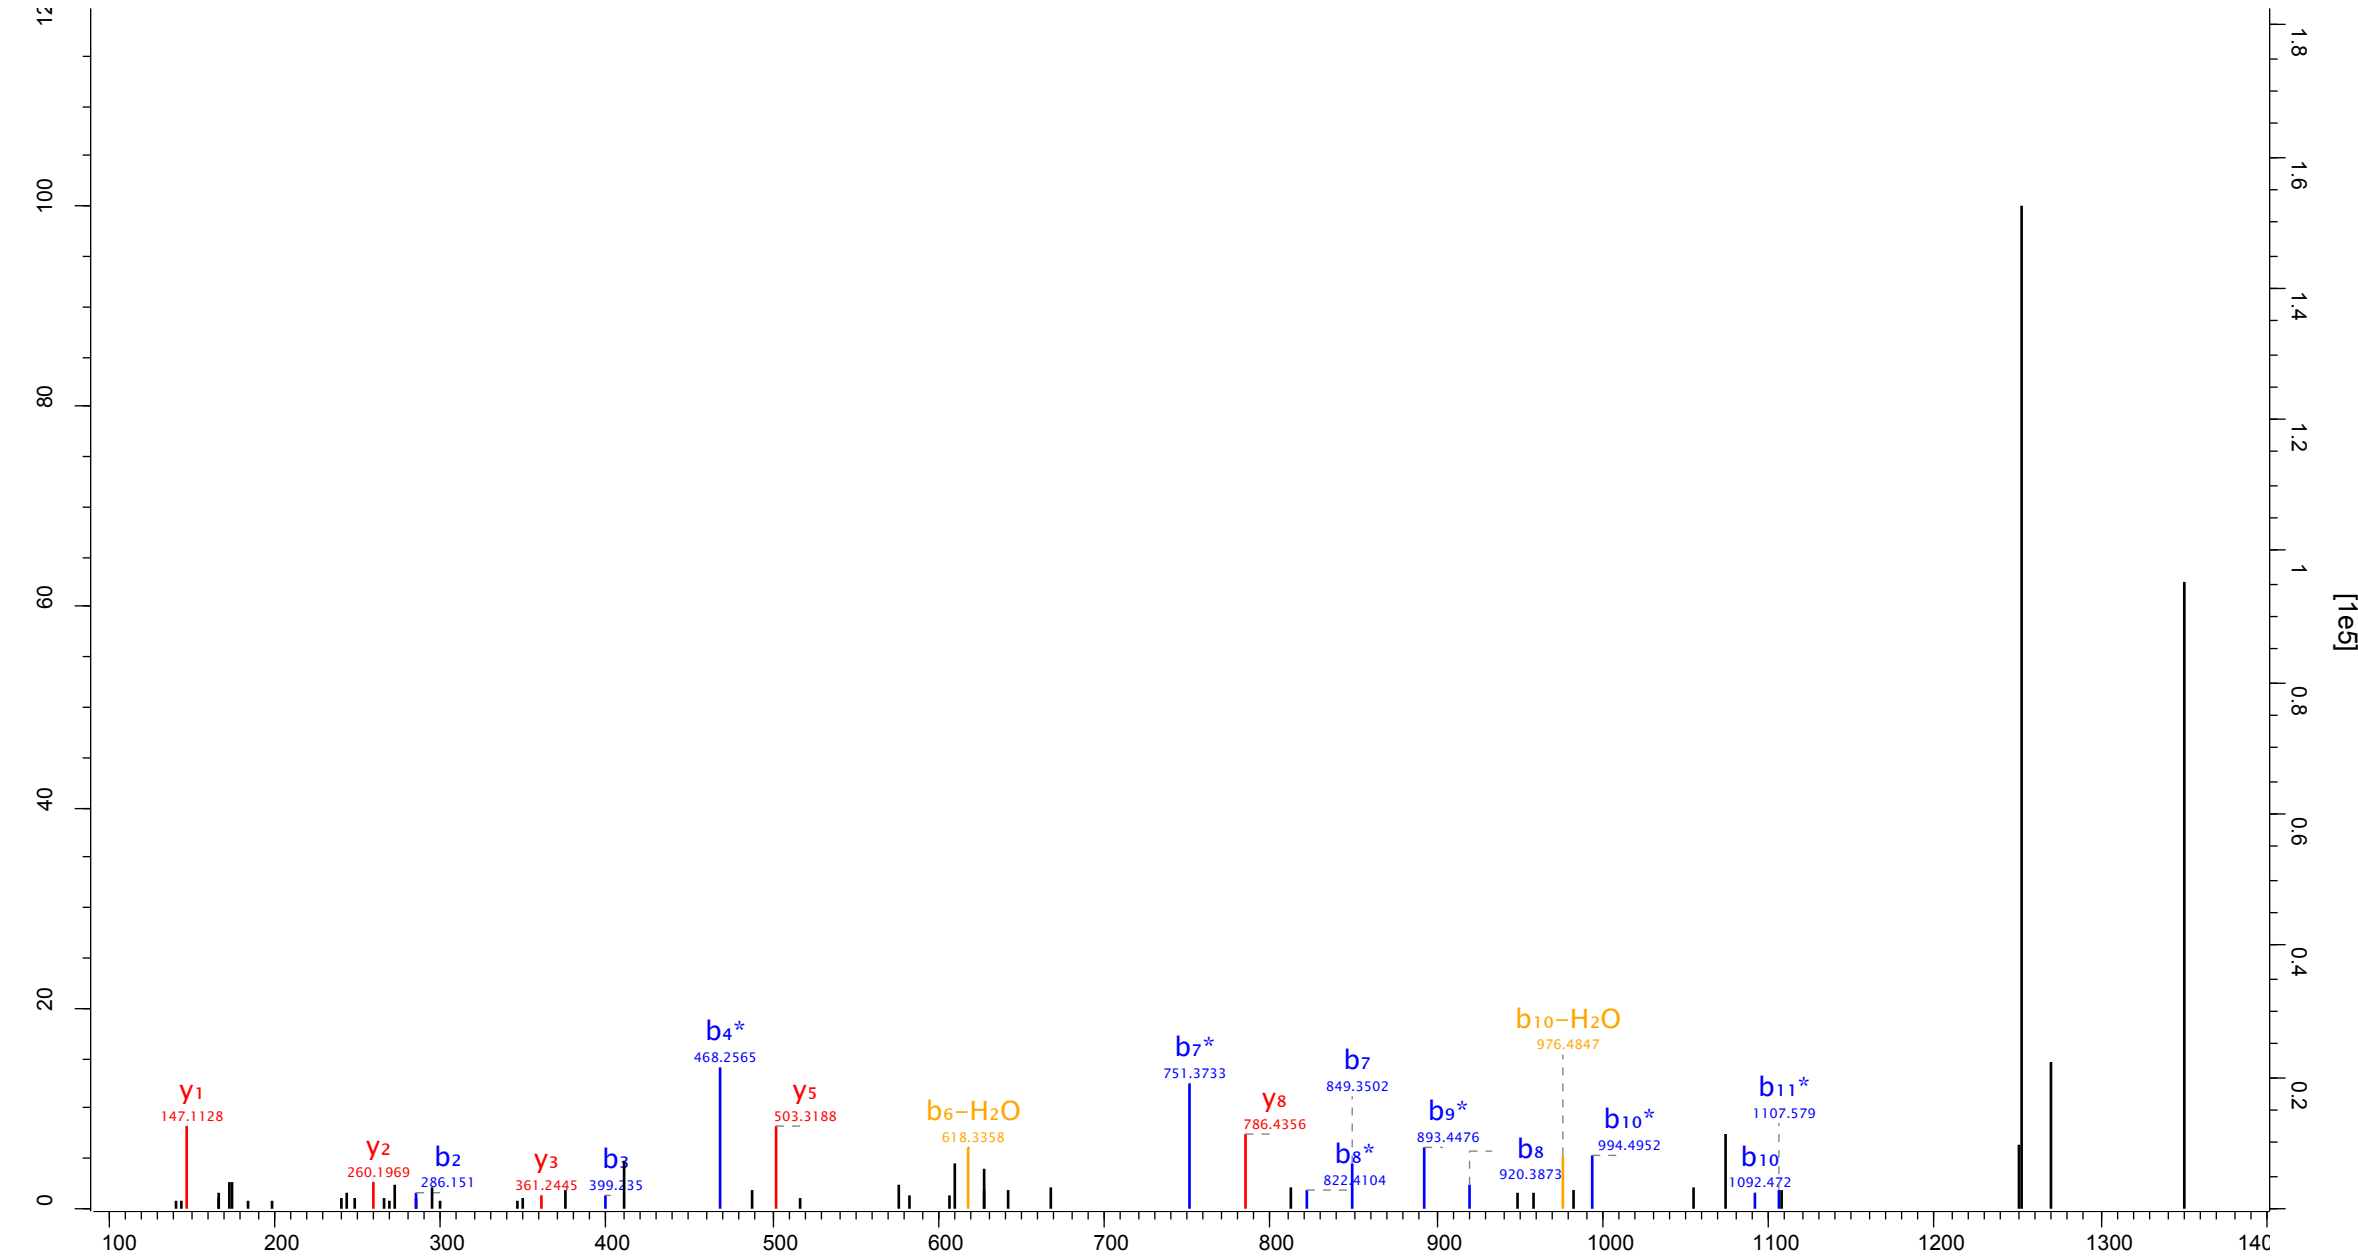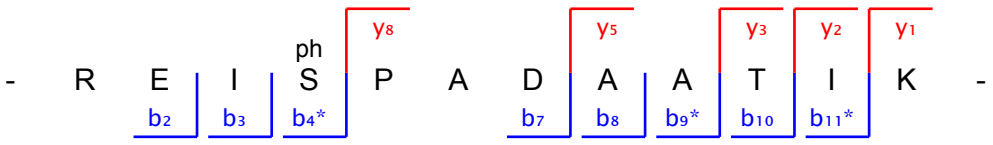

TraesCS5B01G410600.1 - S51

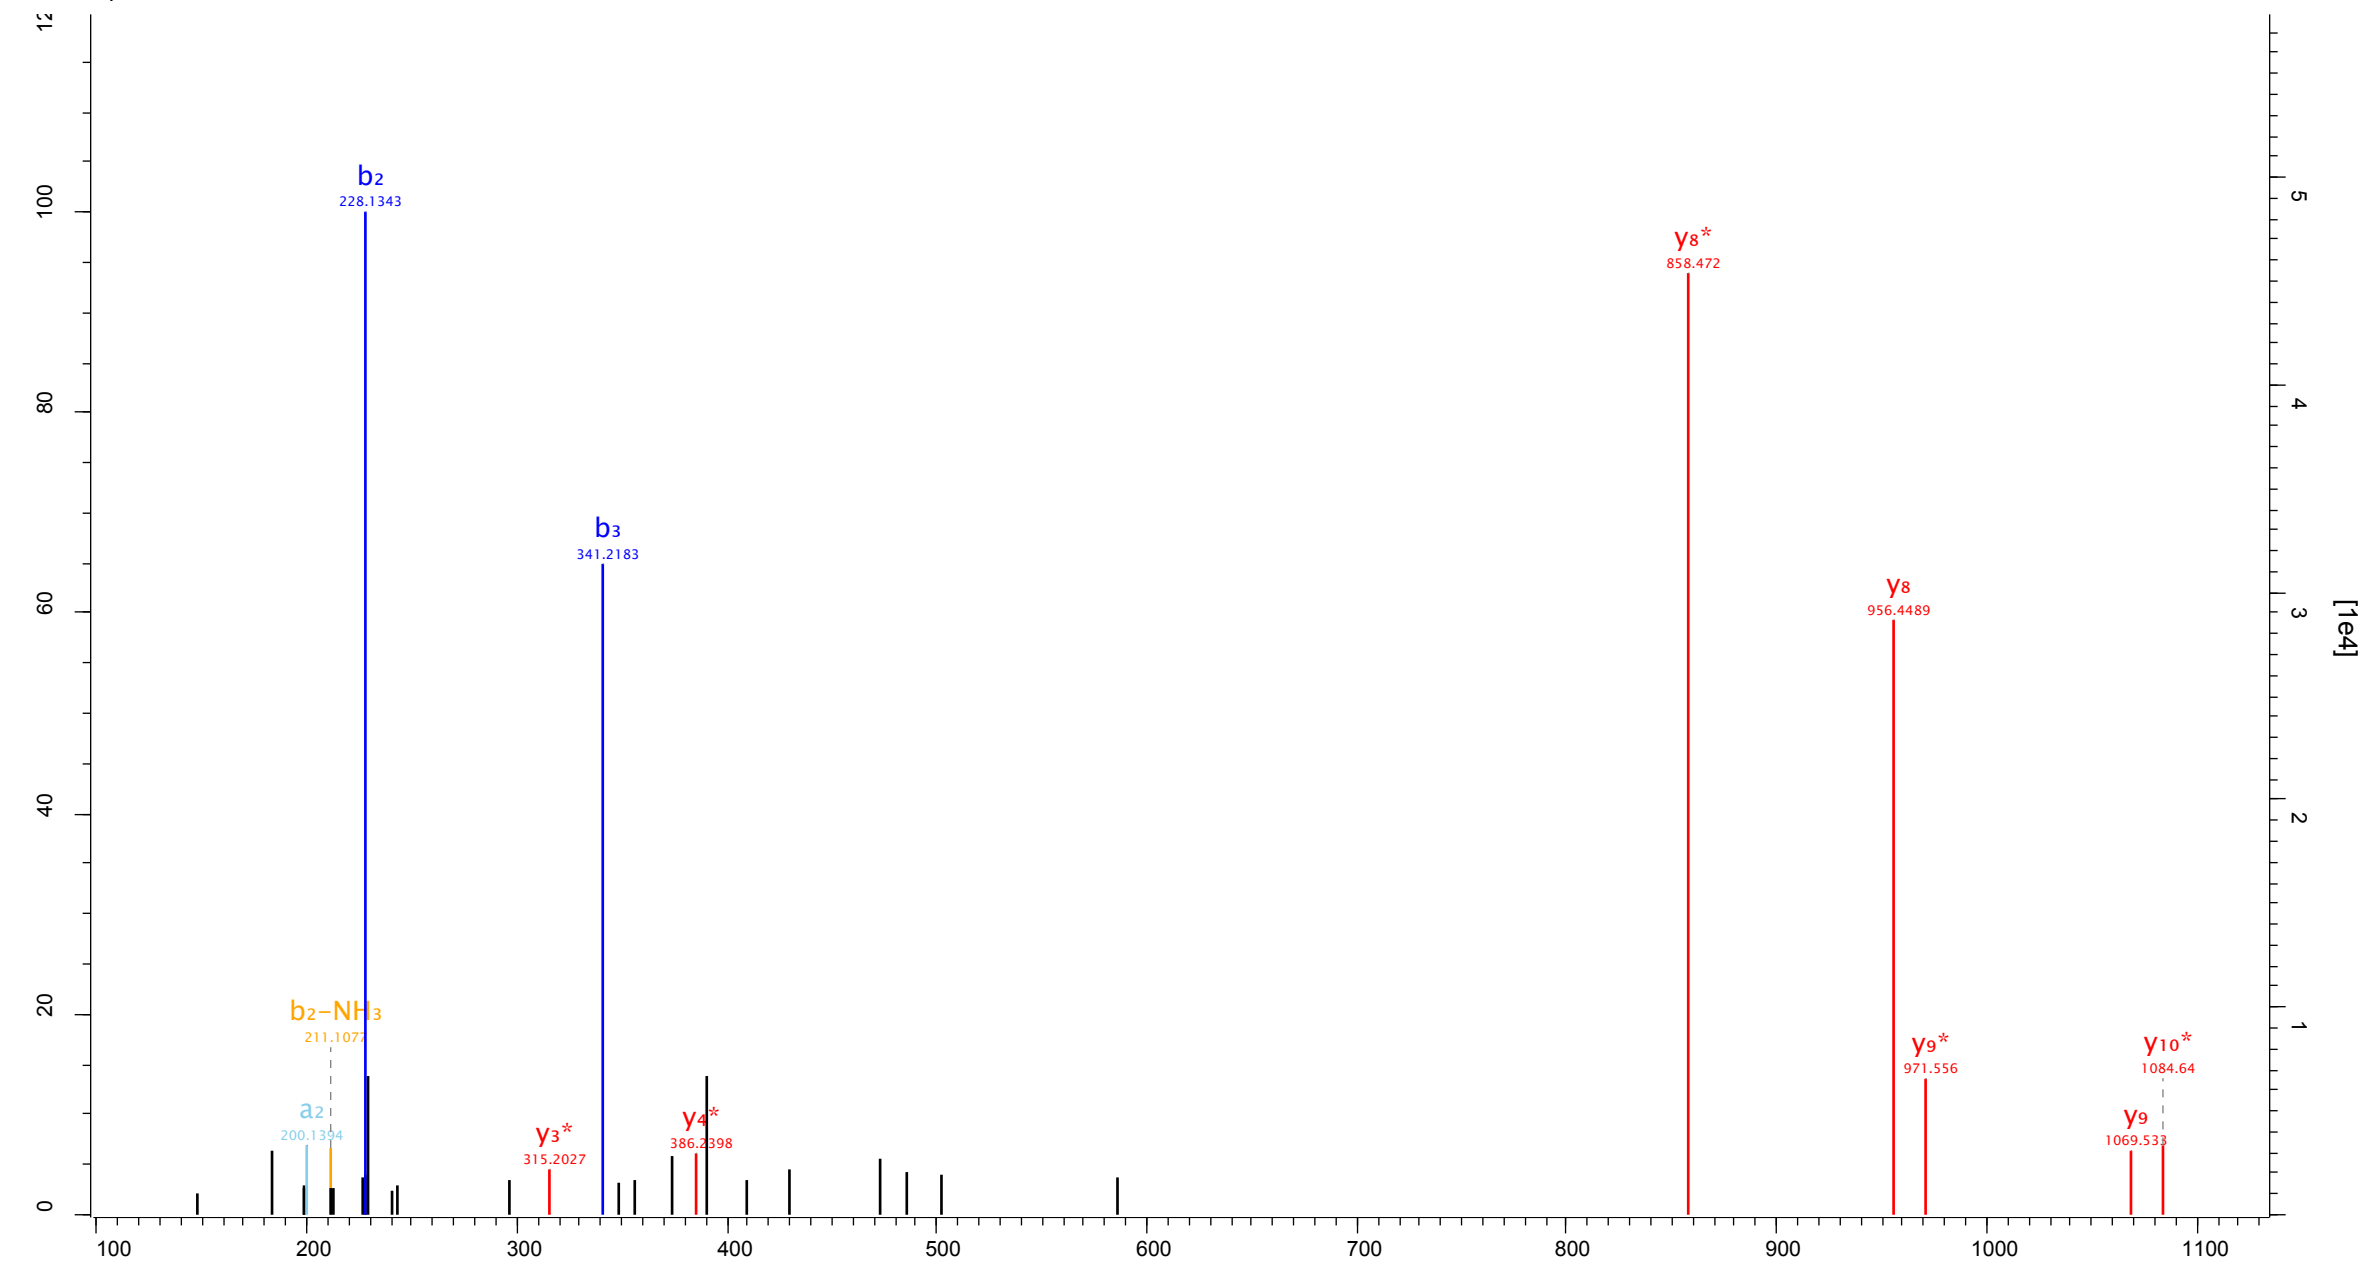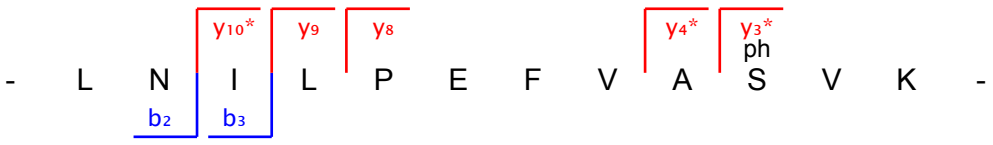

TraesCS6B01G377500.3 - S711

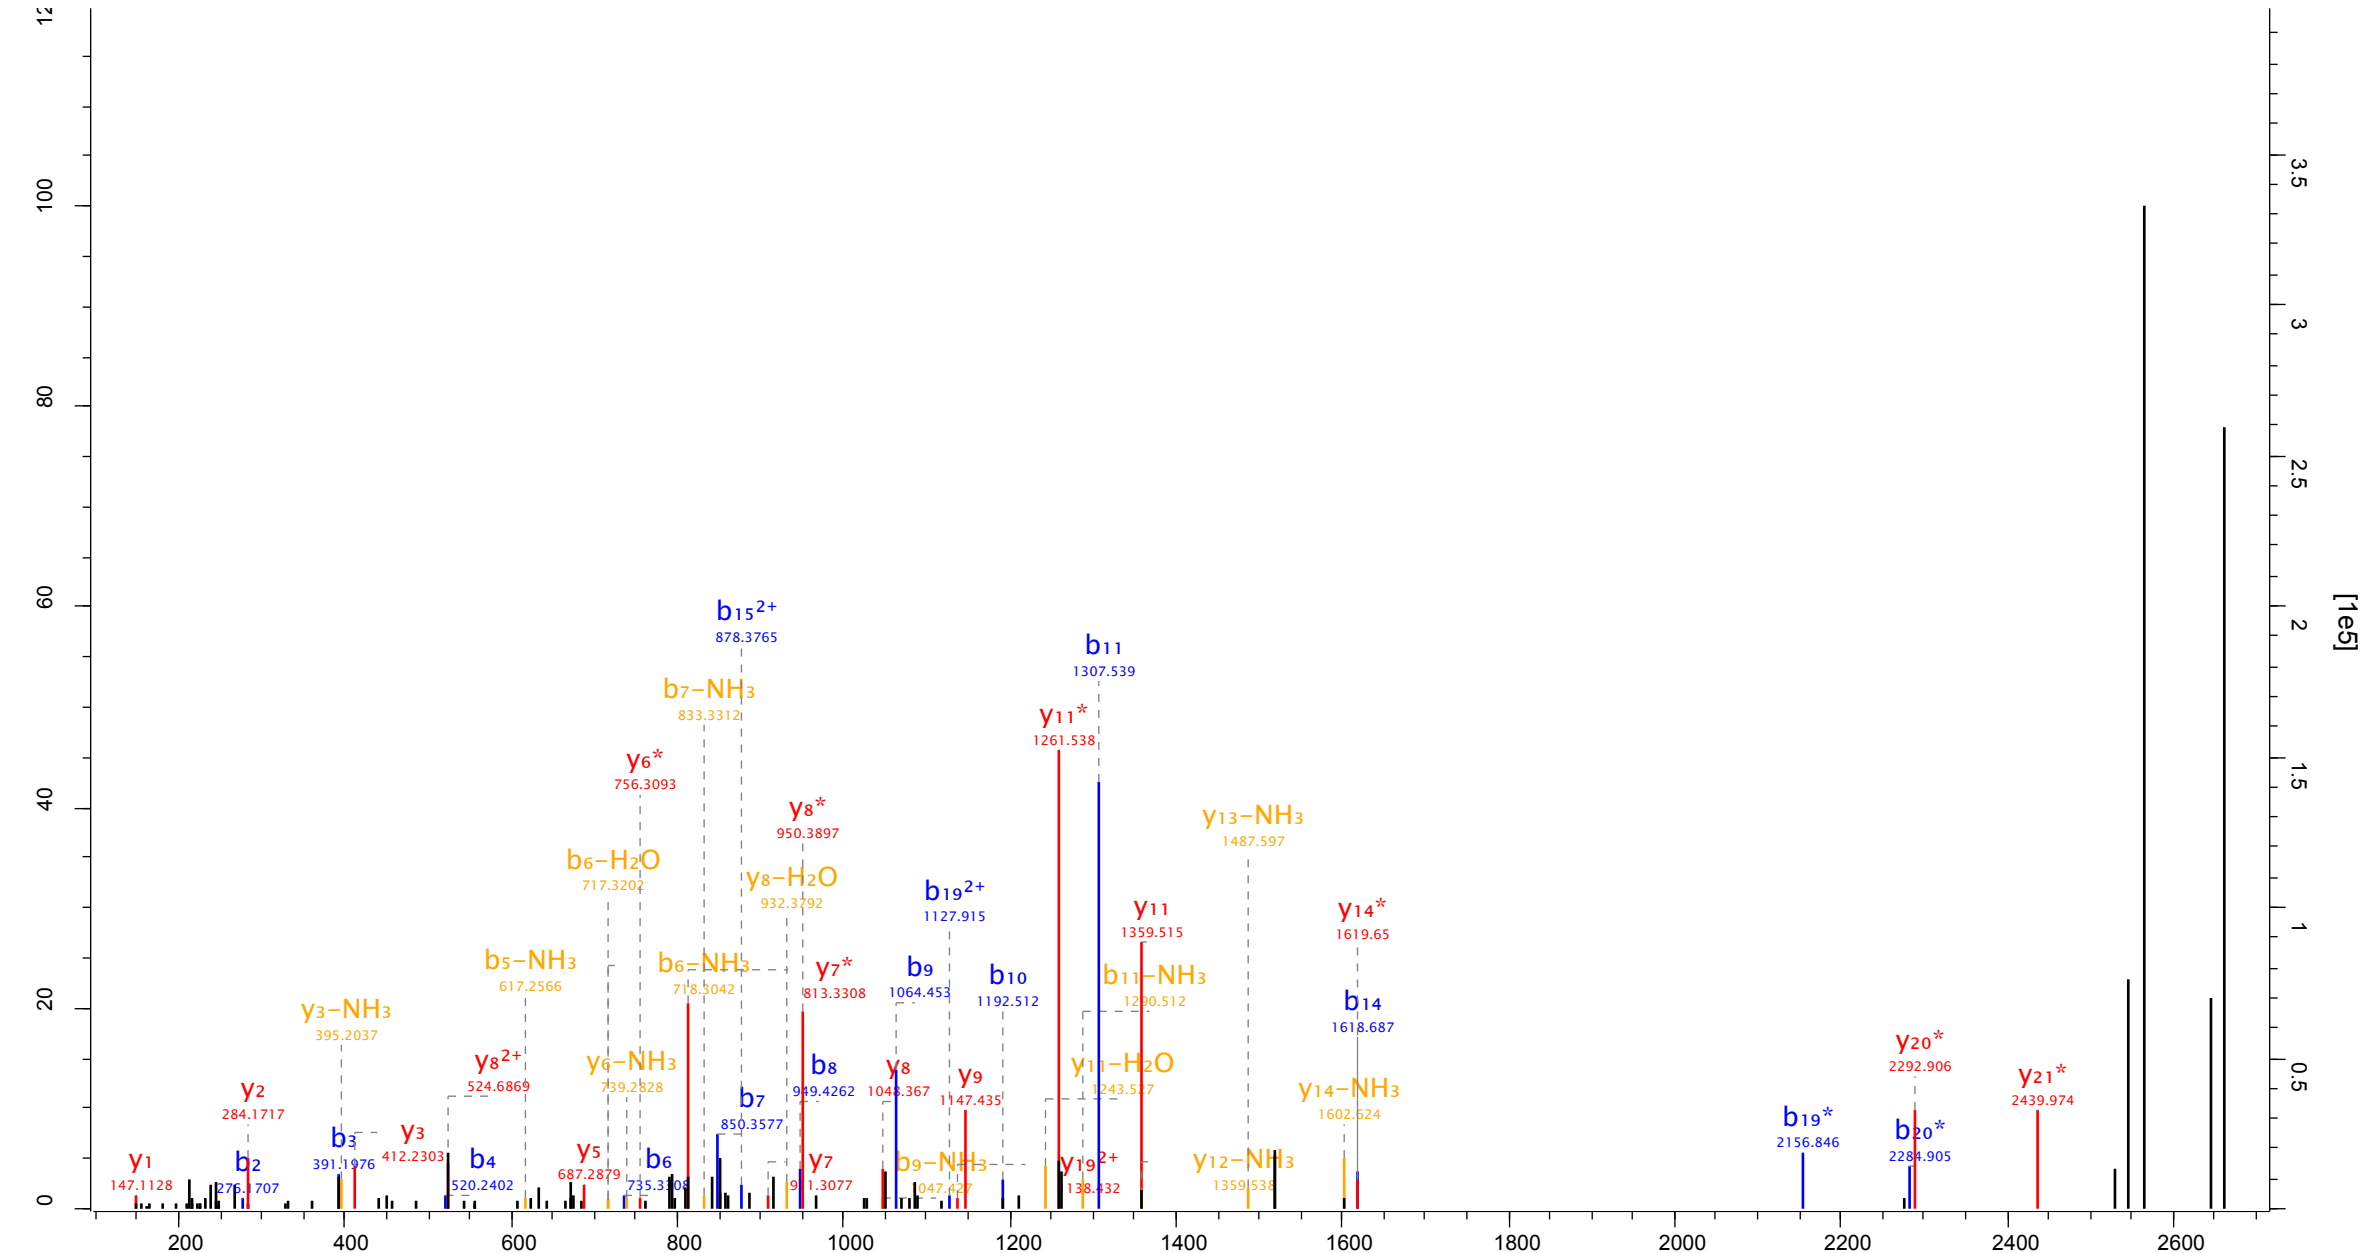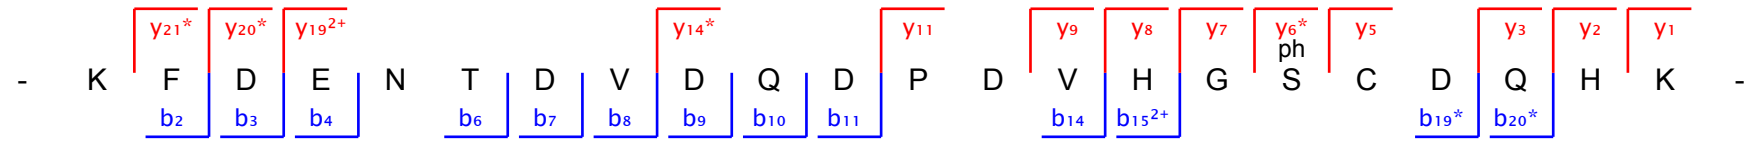

TraesCS6B01G377500.3 - S762

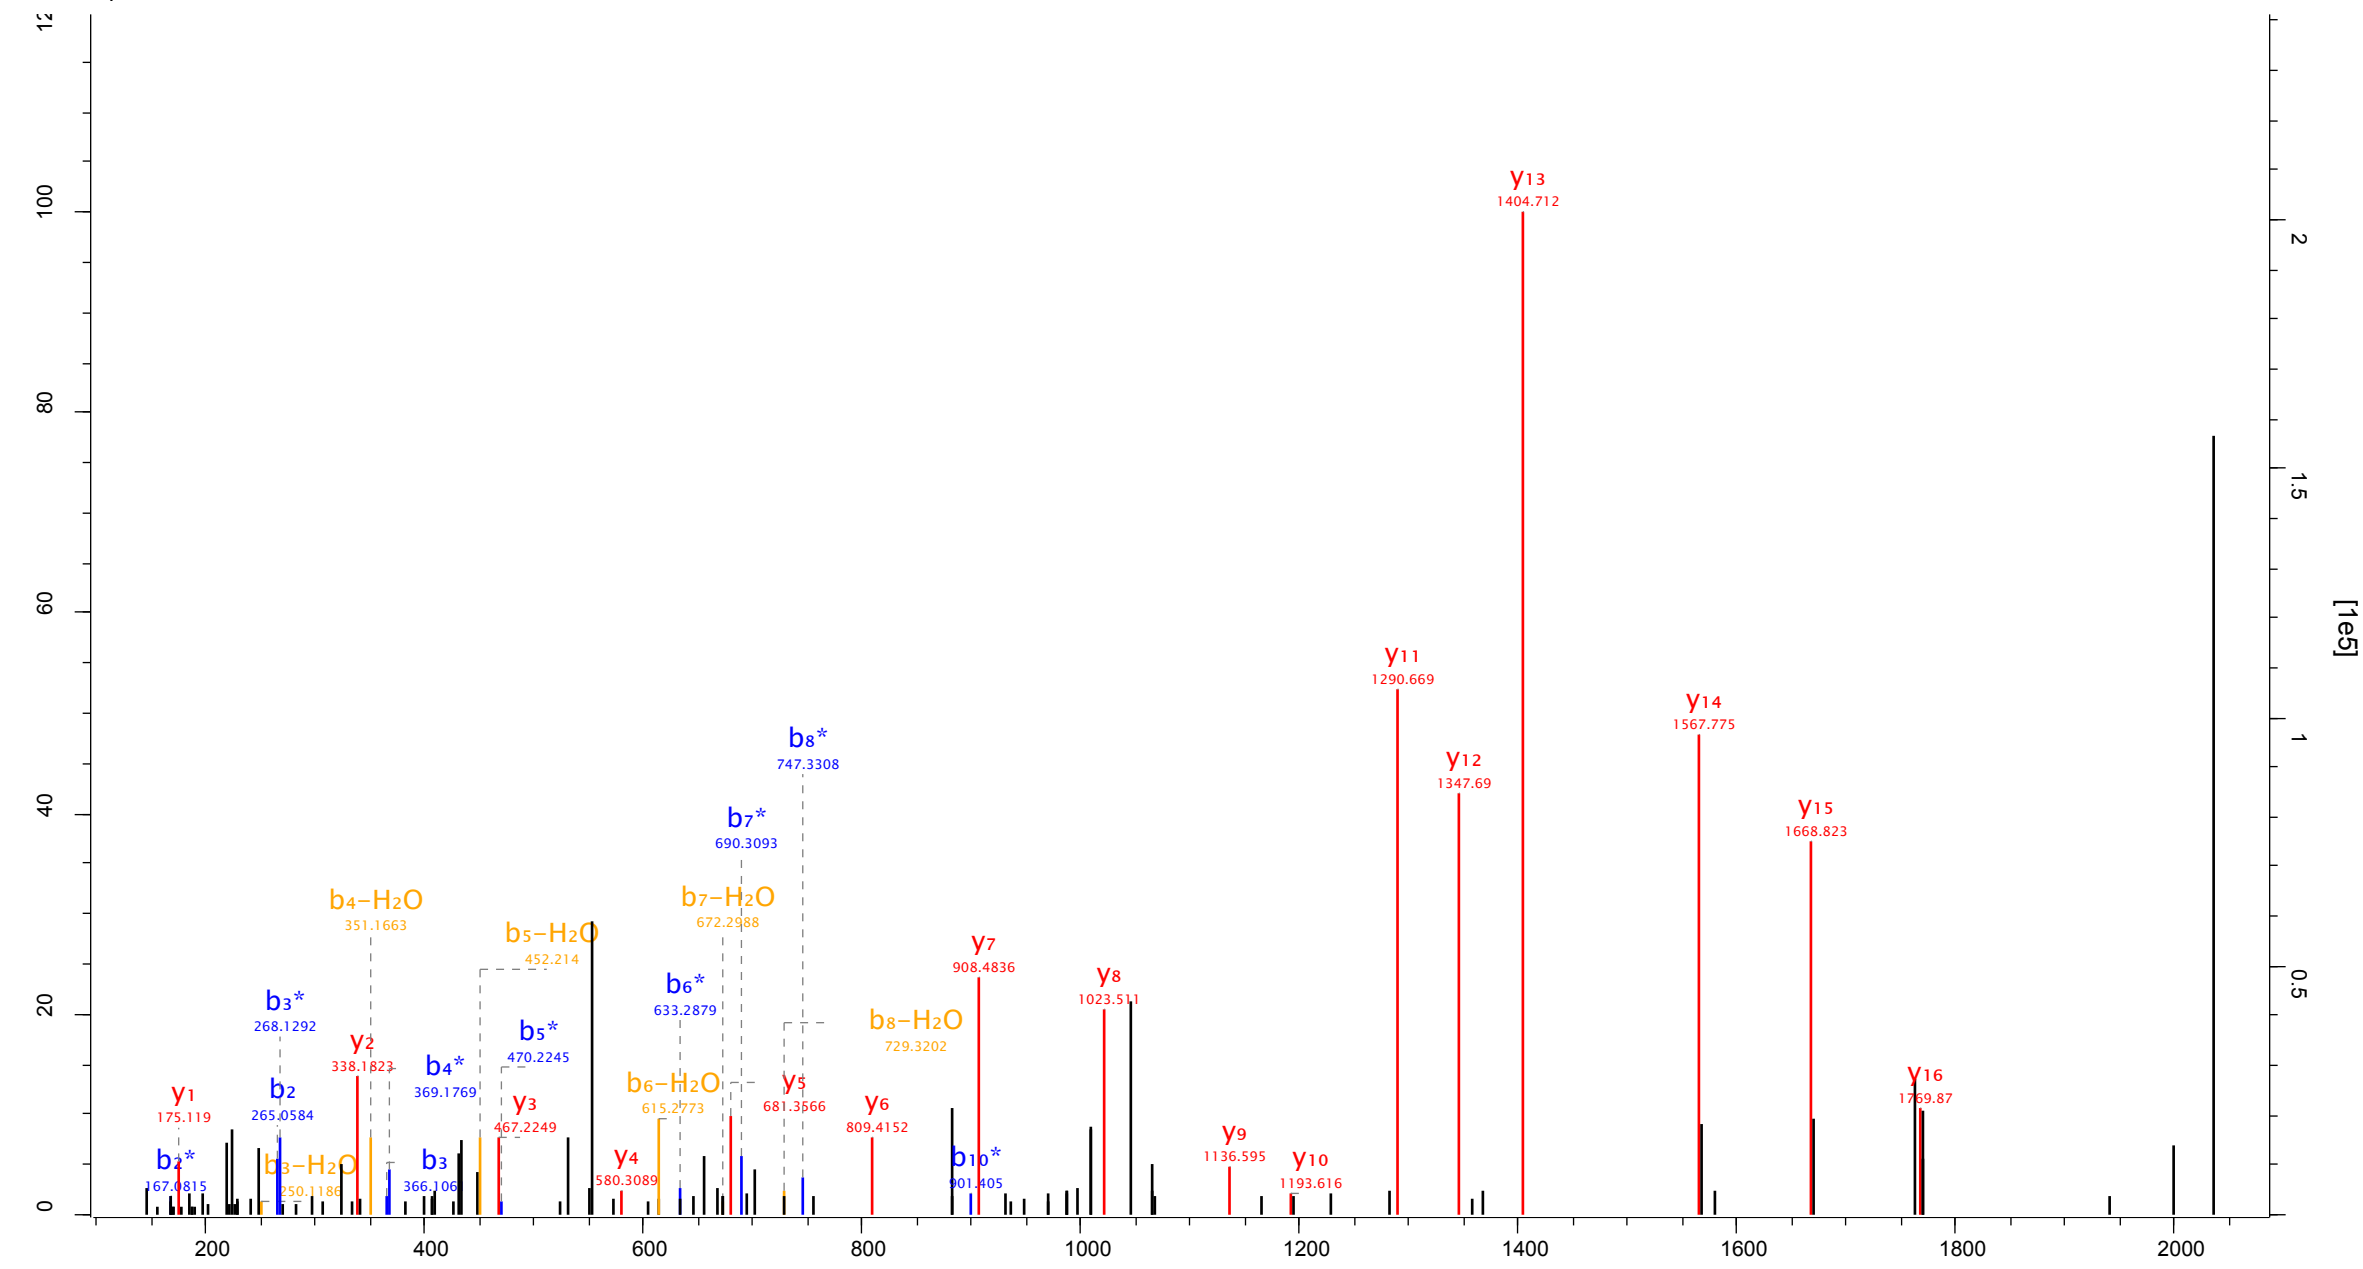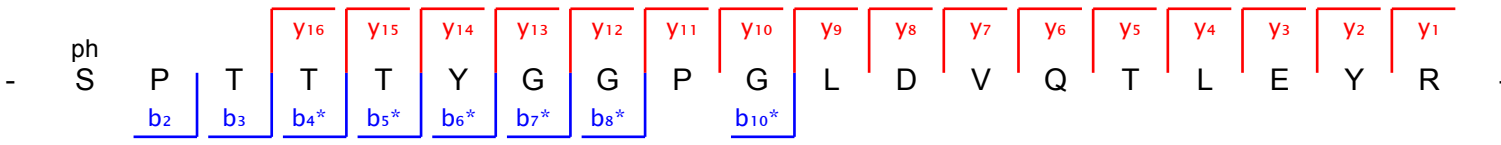

TraesCS5B01G387800.1 - S3236

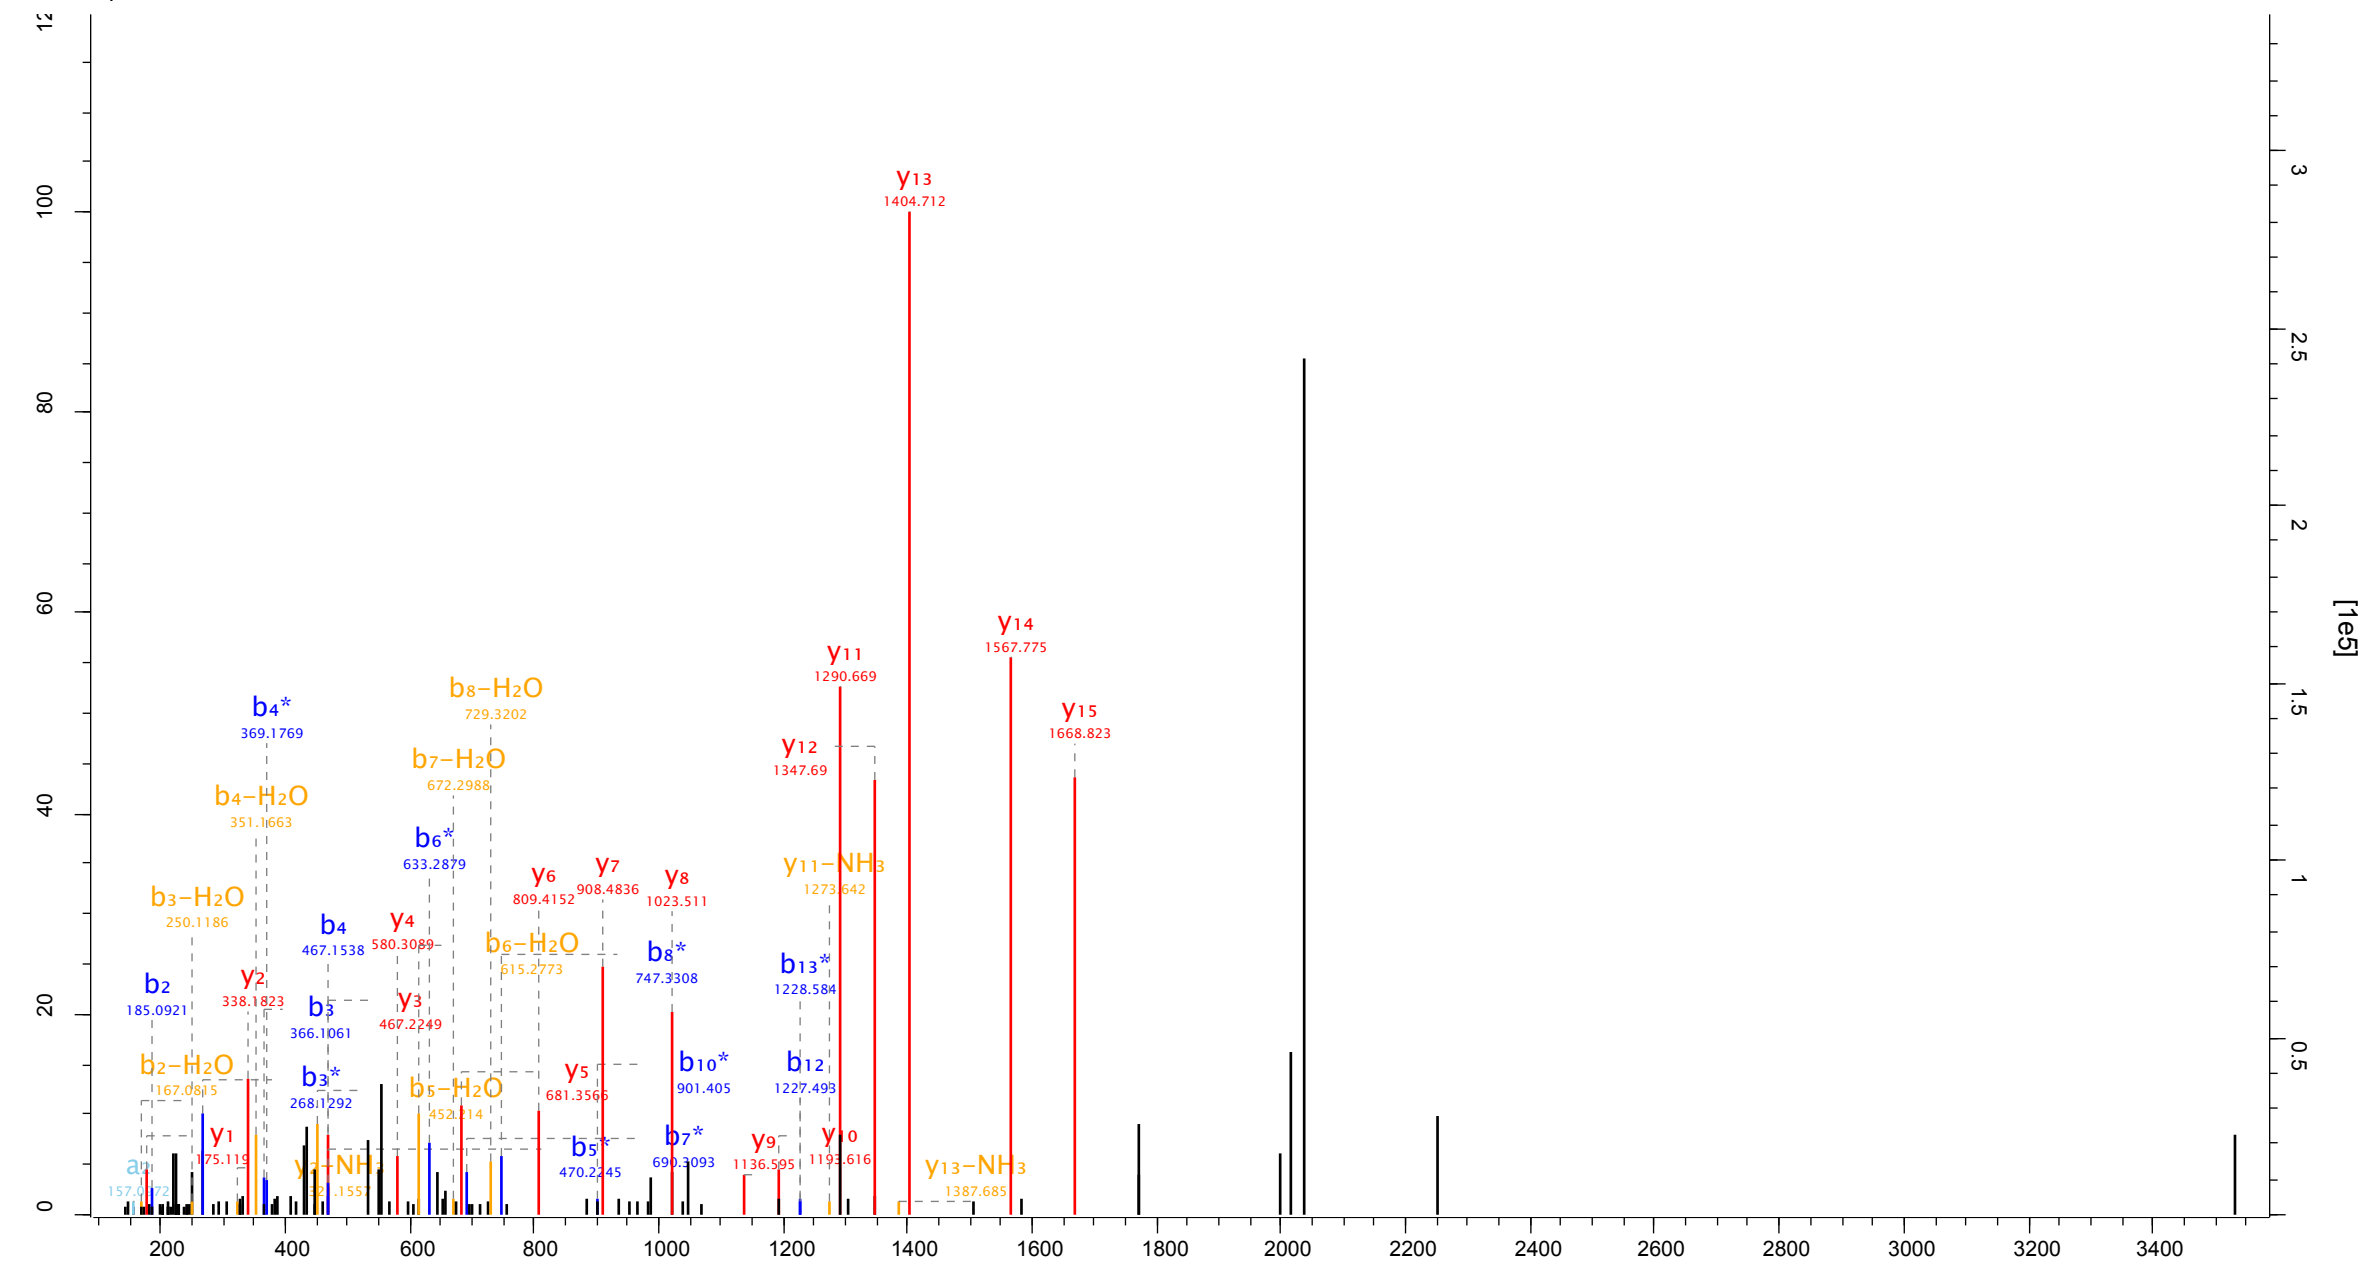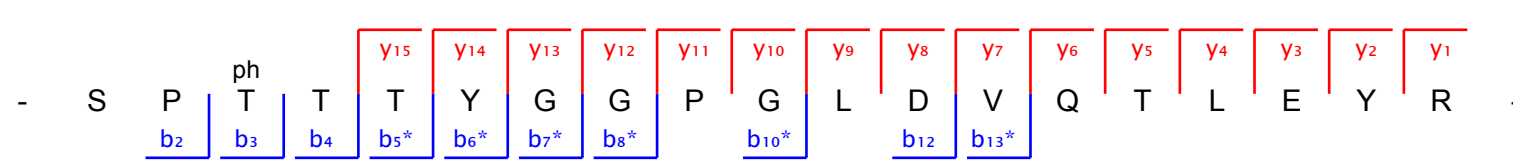

TraesCS5B01G387800.1 - T3238
